# Supplementary material
Source: PubMed Central journal article supplement (PMC5866229)
Supplement: NIHMS941196-supplement-Supporting_Information.pdf [file NIHMS941196-supplement-Supporting_Information.pdf]

## SUPPORTING INFORMATION

### Total Synthesis of Scytonemide A Employing Weinreb AM Solid-Phase Resin

Tyler A. Wilson,<sup>†§</sup> Robert J. Tokarski II,<sup>†§</sup> Peter Sullivan,<sup>‡</sup> Robert M. Demoret,<sup>†</sup> Jimmy Orjala,<sup>‡</sup>  
L. Harinantenaina Rakotondraibe,<sup>†</sup> James R. Fuchs<sup>†\*</sup>

<sup>†</sup>Division of Medicinal Chemistry & Pharmacognosy, College of Pharmacy, The Ohio State University,  
Columbus, OH 43210, United States

<sup>‡</sup>Department of Medicinal Chemistry and Pharmacognosy, College of Pharmacy, University of Illinois at  
Chicago, Chicago, IL 60612, United States

#### Corresponding Author

\*Email: [fuchs.42@osu.edu](mailto:fuchs.42@osu.edu)

<sup>§</sup>These authors contributed equally to the work presented herein.

## Table of Contents

|                                                                                                                                                                     |     |
|---------------------------------------------------------------------------------------------------------------------------------------------------------------------|-----|
| Determination of loading efficiency <sup>S1-S2</sup>                                                                                                                | S2  |
| <u>Tyr(OtBu)<sub>1</sub>-Gly<sub>2</sub>-D-Gln(Trt)<sub>3</sub>-Ile<sub>4</sub>-Ser-(OtBu)<sub>5</sub>-Val<sub>6</sub>-Leu<sub>7</sub> cyclic imine (<b>6a</b>)</u> |     |
| <sup>1</sup> H NMR spectra (CDCl <sub>3</sub> )                                                                                                                     | S3  |
| <sup>13</sup> C NMR spectra (CDCl <sub>3</sub> )                                                                                                                    | S4  |
| HSQC NMR spectra (CDCl <sub>3</sub> )                                                                                                                               | S5  |
| HMBC NMR spectra (CDCl <sub>3</sub> )                                                                                                                               | S6  |
| <u>Synthesis of Fmoc-Ser(OTBS)-OH intermediates <b>8</b> and <b>9</b></u>                                                                                           |     |
| <sup>1</sup> H NMR spectra of <b>8</b> (CDCl <sub>3</sub> )                                                                                                         | S7  |
| <sup>13</sup> C NMR spectra of <b>8</b> (CDCl <sub>3</sub> )                                                                                                        | S8  |
| <sup>1</sup> H NMR spectra of <b>9</b> (CDCl <sub>3</sub> )                                                                                                         | S9  |
| <sup>13</sup> C NMR spectra of <b>9</b> (CDCl <sub>3</sub> )                                                                                                        | S10 |
| <u>Tyr(OTBS)<sub>1</sub>-Gly<sub>2</sub>-D-Gln<sub>3</sub>-Ile<sub>4</sub>-Ser<sub>5</sub>-Val<sub>6</sub>-Leu<sub>7</sub> cyclic imine (<b>12a</b>)</u>            |     |
| <sup>1</sup> H NMR spectra (DMSO- <i>d</i> <sub>6</sub> )                                                                                                           | S11 |
| <sup>13</sup> C NMR spectra (DMSO- <i>d</i> <sub>6</sub> )                                                                                                          | S12 |
| HSQC NMR spectra (DMSO- <i>d</i> <sub>6</sub> )                                                                                                                     | S13 |
| HMBC NMR spectra (DMSO- <i>d</i> <sub>6</sub> )                                                                                                                     | S14 |
| Figure S1. Assignment of –NH and –OH protons in <sup>1</sup> HNMR                                                                                                   | S15 |
| Figure S2. Selective NOESY for TBS-Me (0.16 ppm)                                                                                                                    | S16 |
| Figure S3. D-Gln <sub>3</sub> backbone –NH HMBC correlations                                                                                                        | S17 |
| Figure S4. Val <sub>6</sub> and Ile <sub>4</sub> backbone –NH HMBC correlations                                                                                     | S18 |
| Figure S5. Leu <sub>7</sub> and Gly <sub>2</sub> backbone –NH HMBC correlations                                                                                     | S19 |
| Figure S6. Ser <sub>5</sub> backbone –NH HMBC correlations                                                                                                          | S20 |
| Figure S7A. D-Gln <sub>3</sub> side chain –NH HMBC correlations                                                                                                     | S21 |
| Figure S7B. D-Gln <sub>3</sub> side chain –NH HMBC correlations (continued)                                                                                         | S22 |
| Figure S8. Ser <sub>5</sub> side chain -OH HMBC correlations                                                                                                        | S23 |
| <u>Tyr(OTBS)<sub>1</sub>-Gly<sub>2</sub>-D-Gln<sub>3</sub>-Ile<sub>4</sub>-Ser(OTIPS)<sub>5</sub>-Val<sub>6</sub>-Leu<sub>7</sub> cyclic imine (<b>12b</b>)</u>     |     |
| <sup>1</sup> H NMR spectra (DMSO- <i>d</i> <sub>6</sub> )                                                                                                           | S24 |
| <sup>13</sup> C NMR spectra (DMSO- <i>d</i> <sub>6</sub> )                                                                                                          | S25 |
| <u>Scytonemide A (<b>1</b>)</u>                                                                                                                                     |     |
| <sup>1</sup> H NMR spectra (DMSO- <i>d</i> <sub>6</sub> )                                                                                                           | S26 |
| <sup>13</sup> C NMR spectra (DMSO- <i>d</i> <sub>6</sub> )                                                                                                          | S27 |
| HSQC NMR spectra (DMSO- <i>d</i> <sub>6</sub> )                                                                                                                     | S28 |
| <sup>1</sup> H NMR spectra (methanol- <i>d</i> <sub>4</sub> )                                                                                                       | S29 |
| Figure S9. Selective TOCSY experiments for amino acid residues                                                                                                      | S30 |
| Figure S10. <sup>1</sup> H NMR spectra for <b>1</b> from Krunic et al. <sup>S3</sup> , Malins et al. <sup>S1</sup> , and present work                               | S31 |
| References                                                                                                                                                          | S32 |

### Determination of Loading Efficiency<sup>S1</sup>

The Fmoc-Leu loaded Weinreb resin (100 mg, substitution = 0.44 mmol/g for synthesis of **6a**, 0.73 mmol/g for synthesis of **12a/b**) was shaken in a solution of piperidine/DMF (3 mL, 1:9 v/v) for 5 min and then repeated for 10 min. The deprotection solutions were combined and an aliquot (150  $\mu$ L) was diluted 20-fold to 3 mL. 300  $\mu$ L of this solution was then diluted 10-fold to 3 mL and placed in a quartz cuvette to measure UV absorbance of the piperidine-fulvene adduct ( $\lambda = 289.8$  nm,  $\epsilon_c = 6089$  M<sup>-1</sup> cm<sup>-1</sup> as recommended by Eissler et al<sup>S2</sup>) for quantification of Leu loaded onto the resin.

Equation for Loading Efficiency:

$$\text{Loading} \left( \frac{\text{mmol}}{\text{g}} \right) = \frac{(\text{Abs}_{289.8} * v_{\text{cuvette}} * D)}{(\epsilon_c * l * m^{\text{resin}})}$$

where  $V_{\text{cuvette}} = 3$  mL

D (dilution factor) = 200

$\epsilon_c^{\text{S2}} = 6089$  mL\*mmol<sup>-1</sup>\*cm<sup>-1</sup>

l (path length) = 1 cm

$m^{\text{resin}} = 100$  mg

Weinreb Resin, substitution = 0.44 mmol/g: Abs<sub>298.8</sub> = 0.336, loading = 0.331 mmol/g

Weinreb Resin, substitution = 0.73 mmol/g: Abs<sub>298.8</sub> = 0.299, loading = 0.295 mmol/g



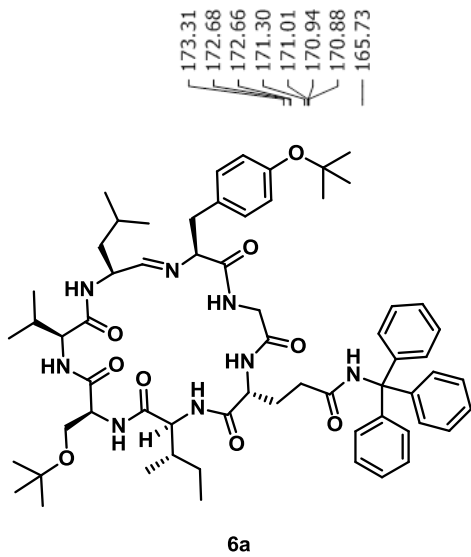

**6a**

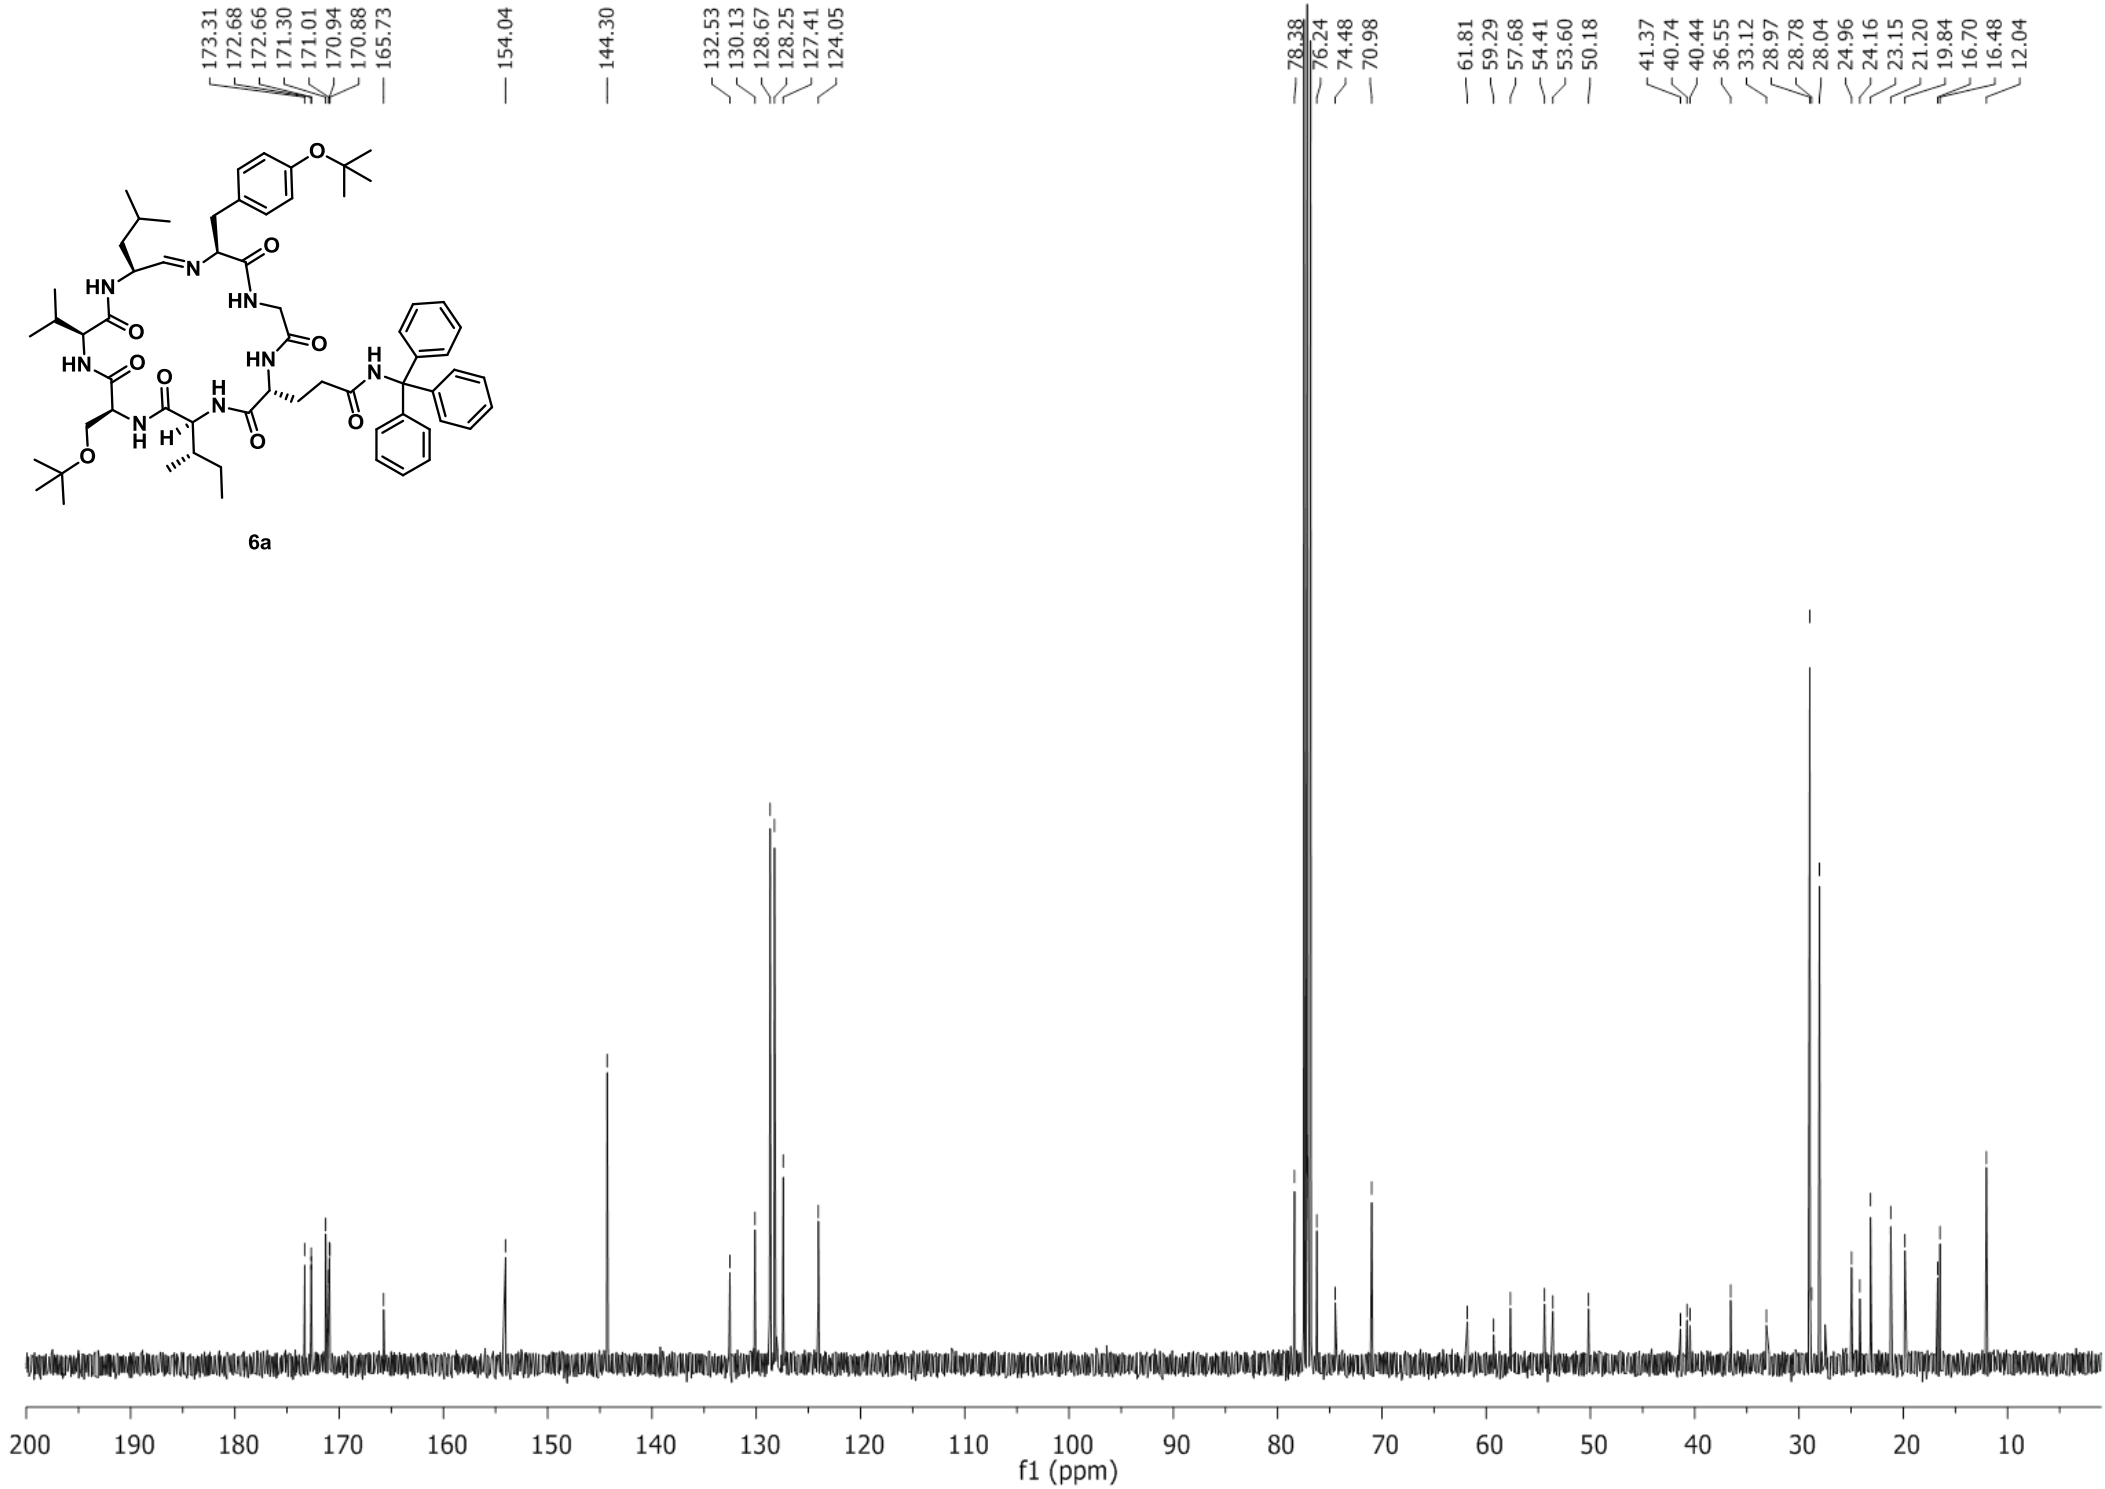

$^{13}\text{C}$  NMR ( $\text{CDCl}_3$ , 101 MHz) of compound **6a**.





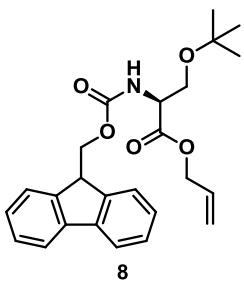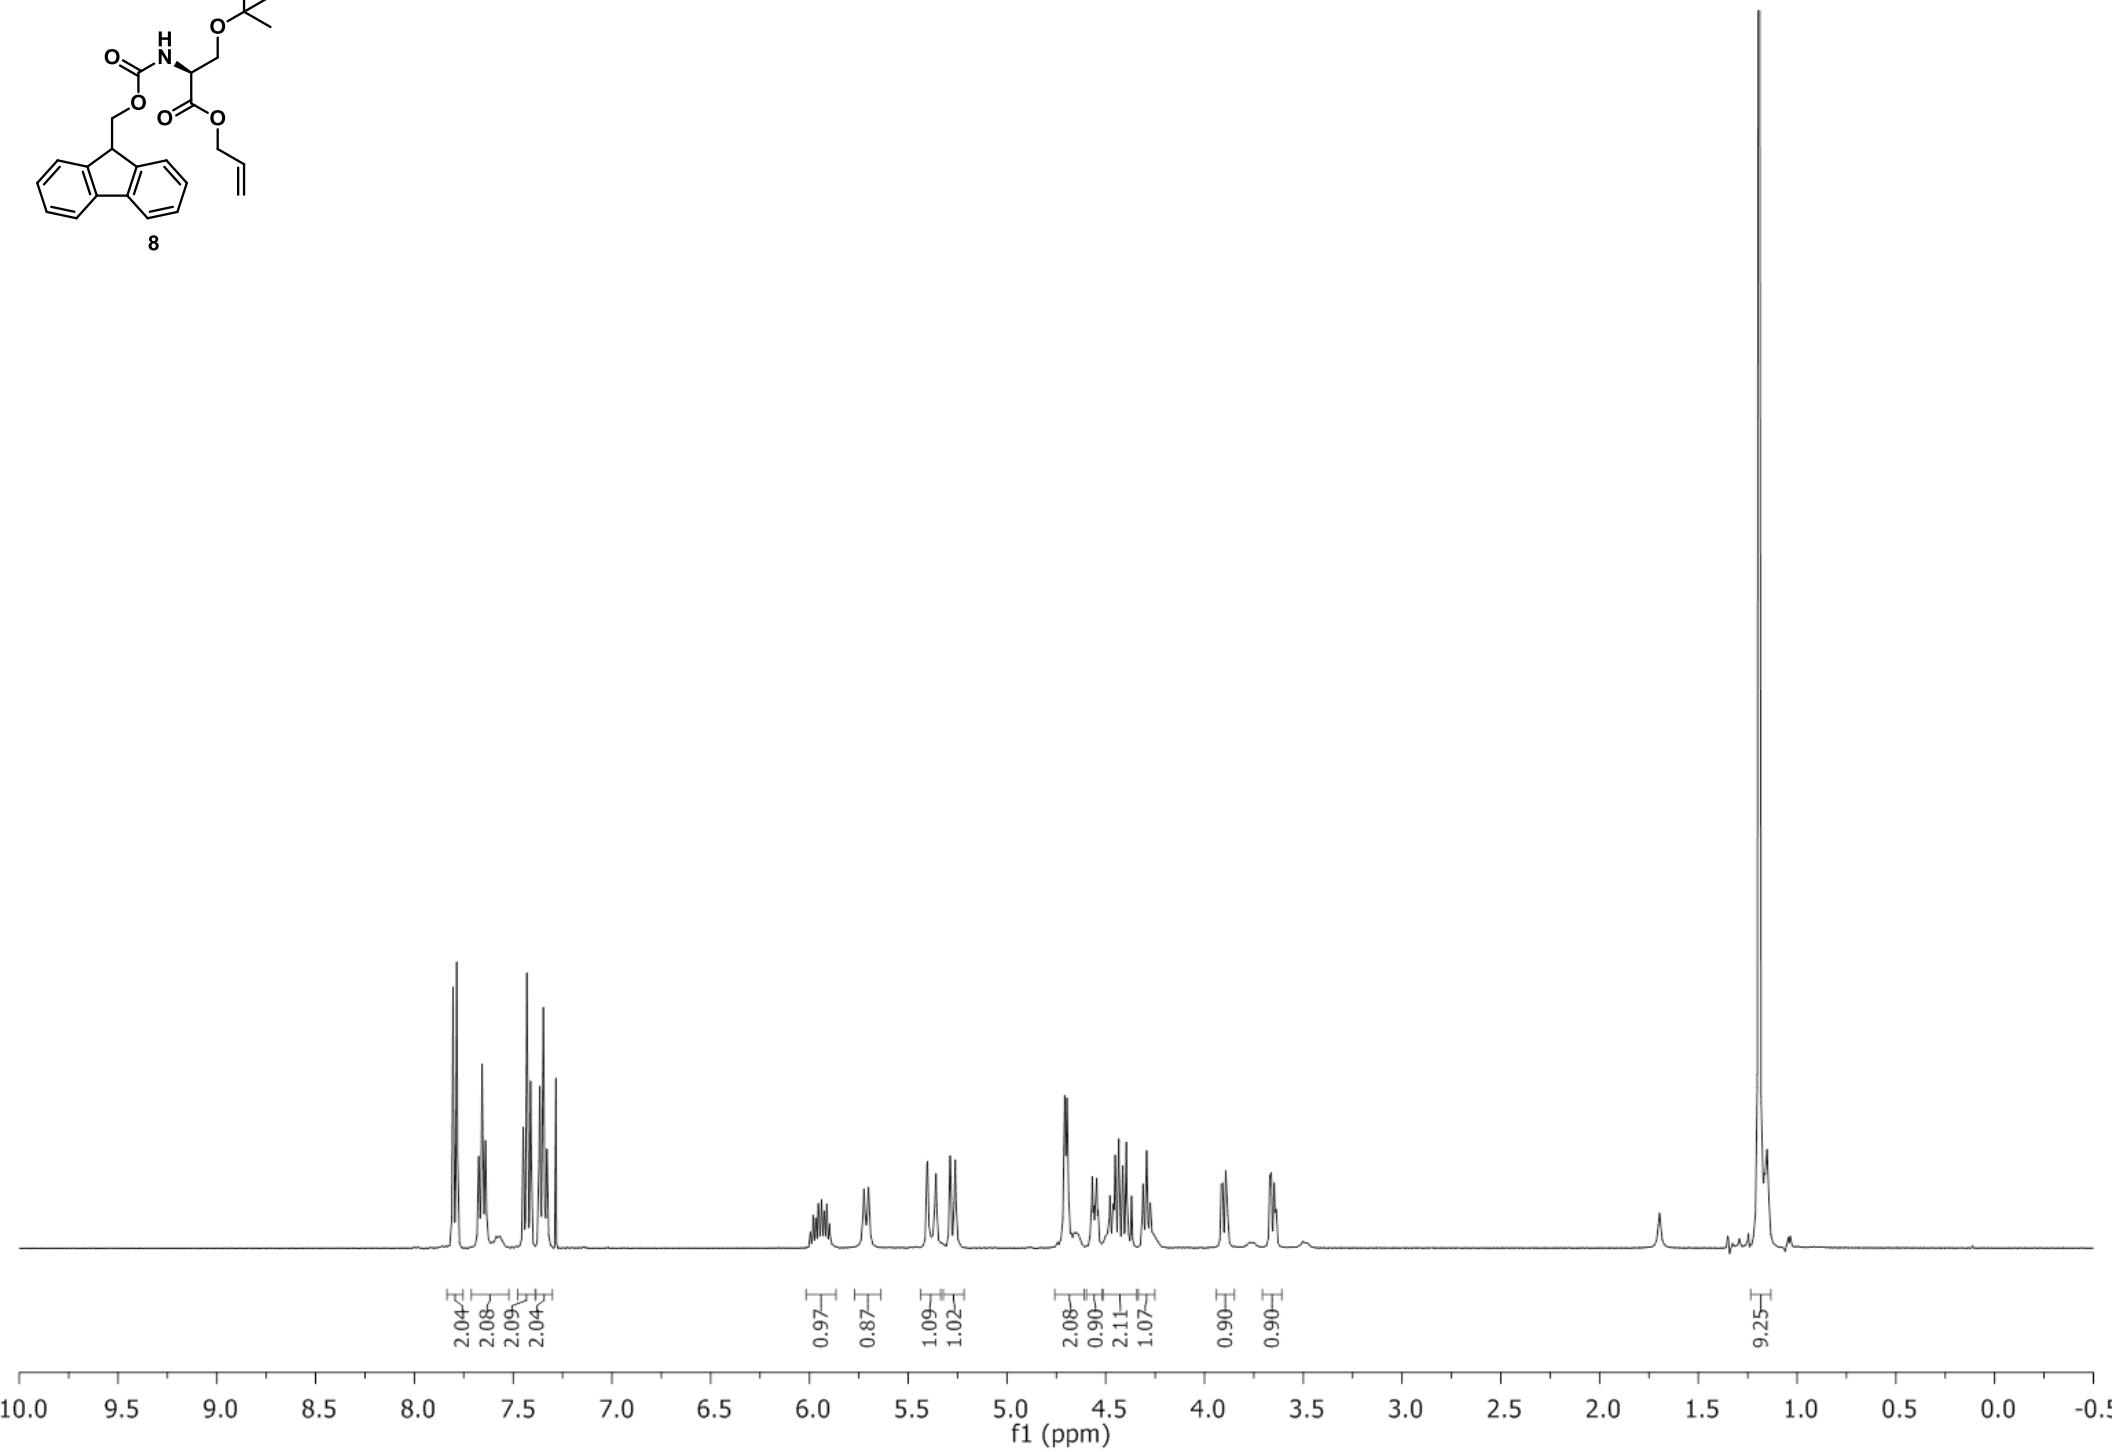

<sup>1</sup>H NMR (CDCl<sub>3</sub>, 400 MHz) of compound **8**.



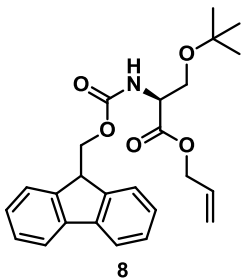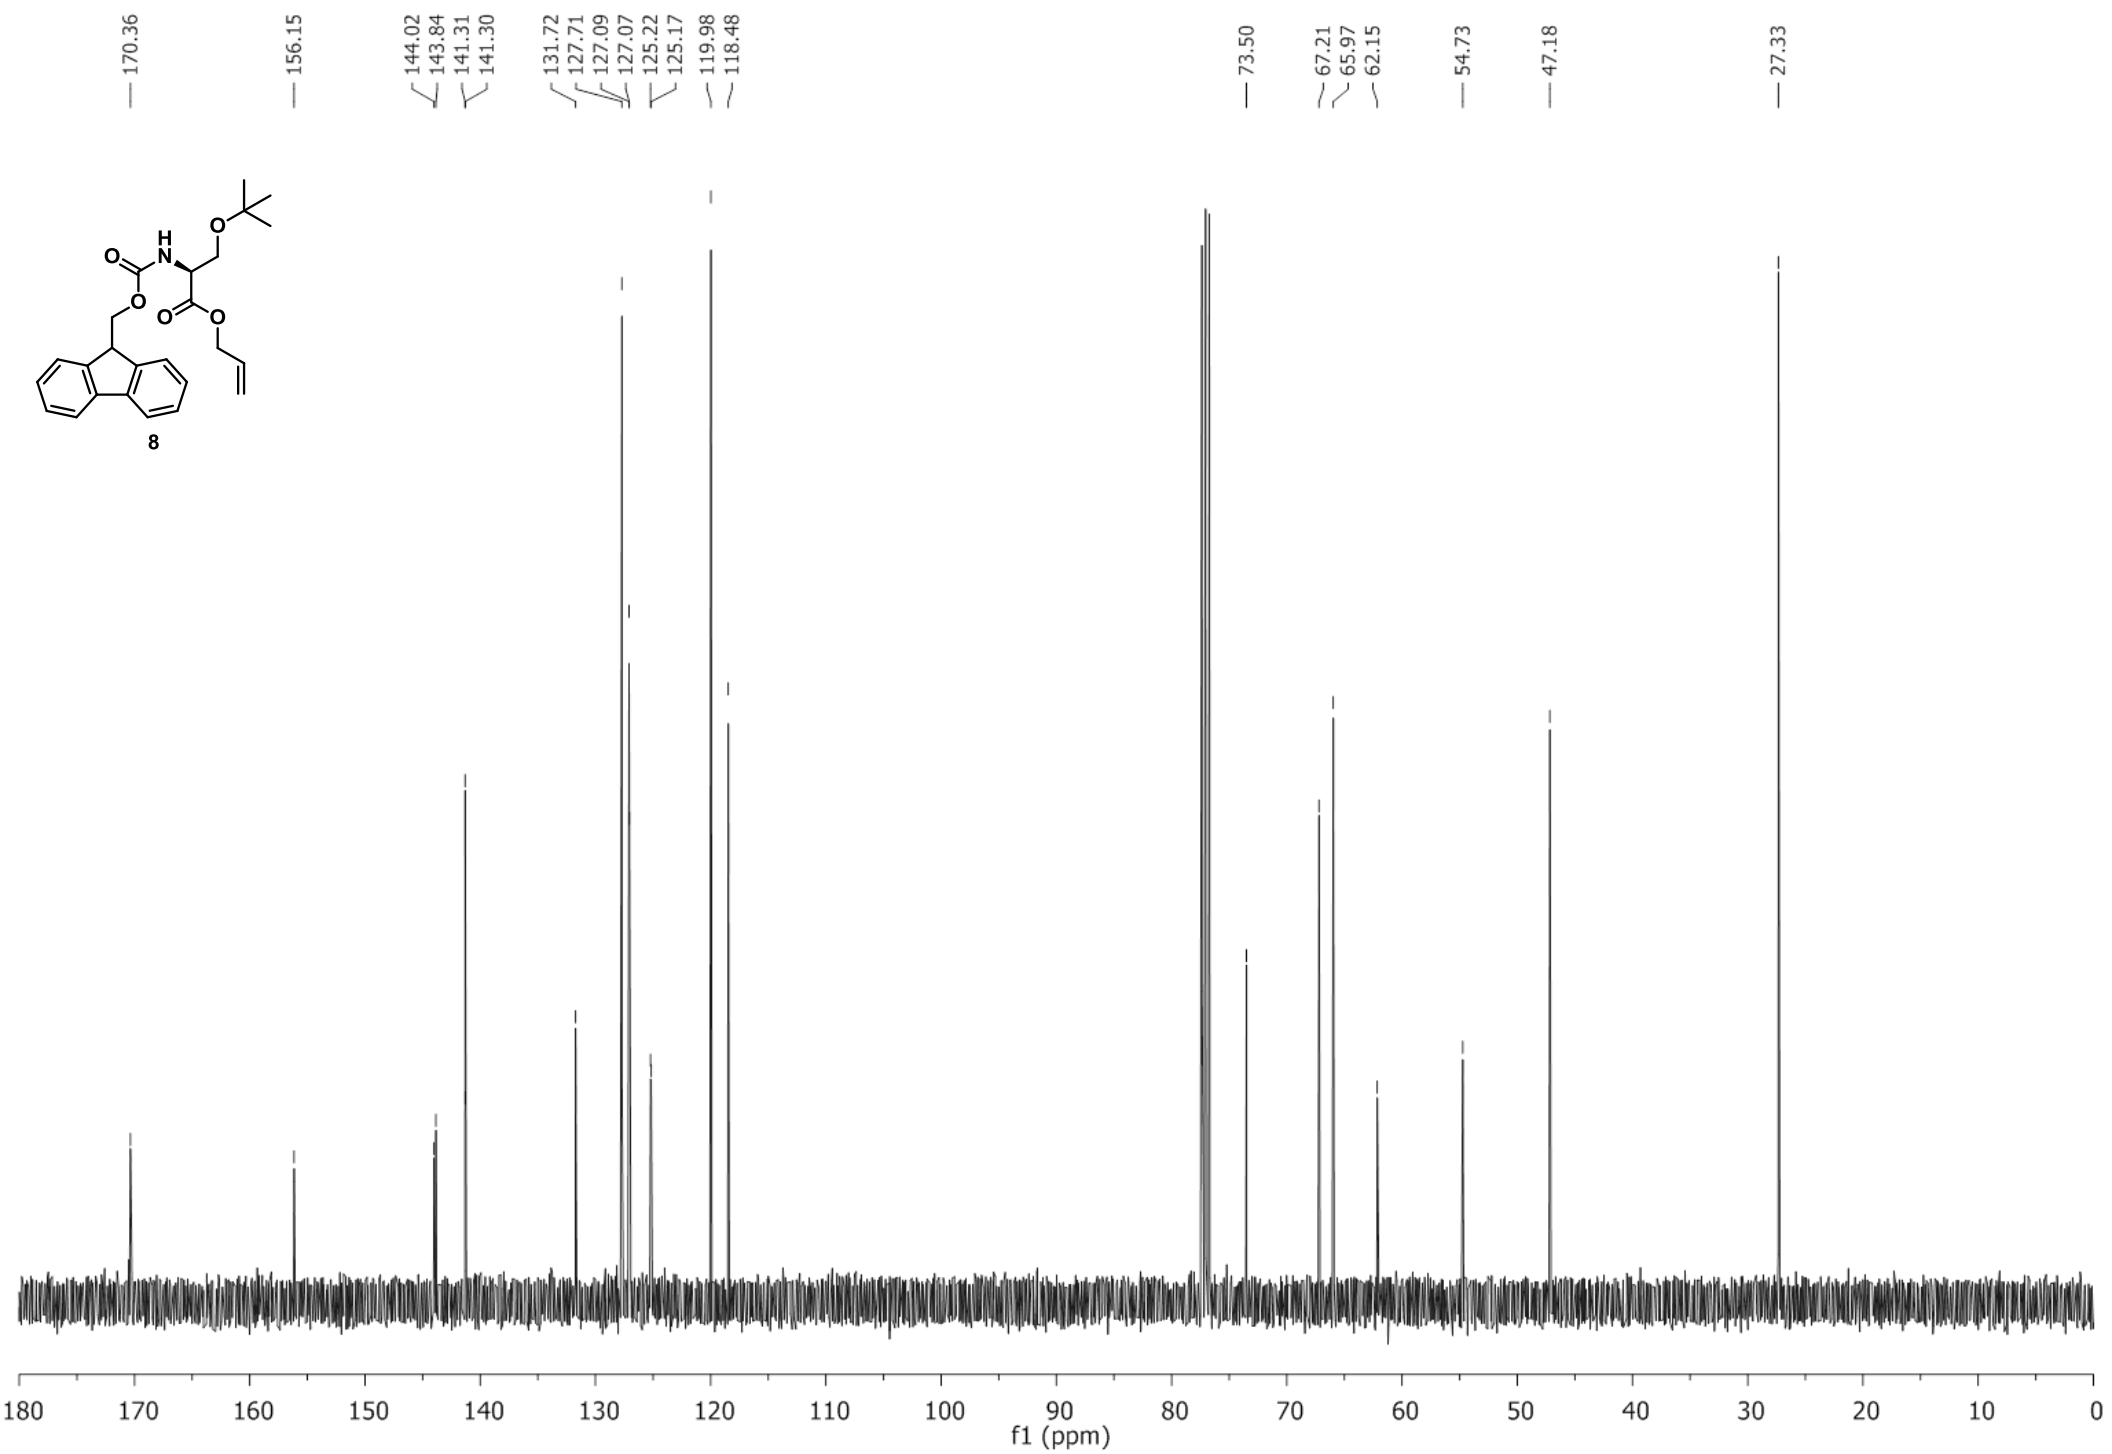

<sup>13</sup>C NMR (CDCl<sub>3</sub>, 101 MHz) of compound **8**.

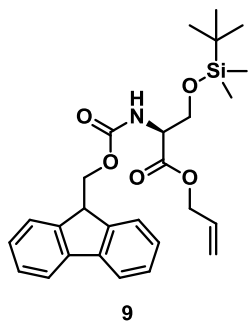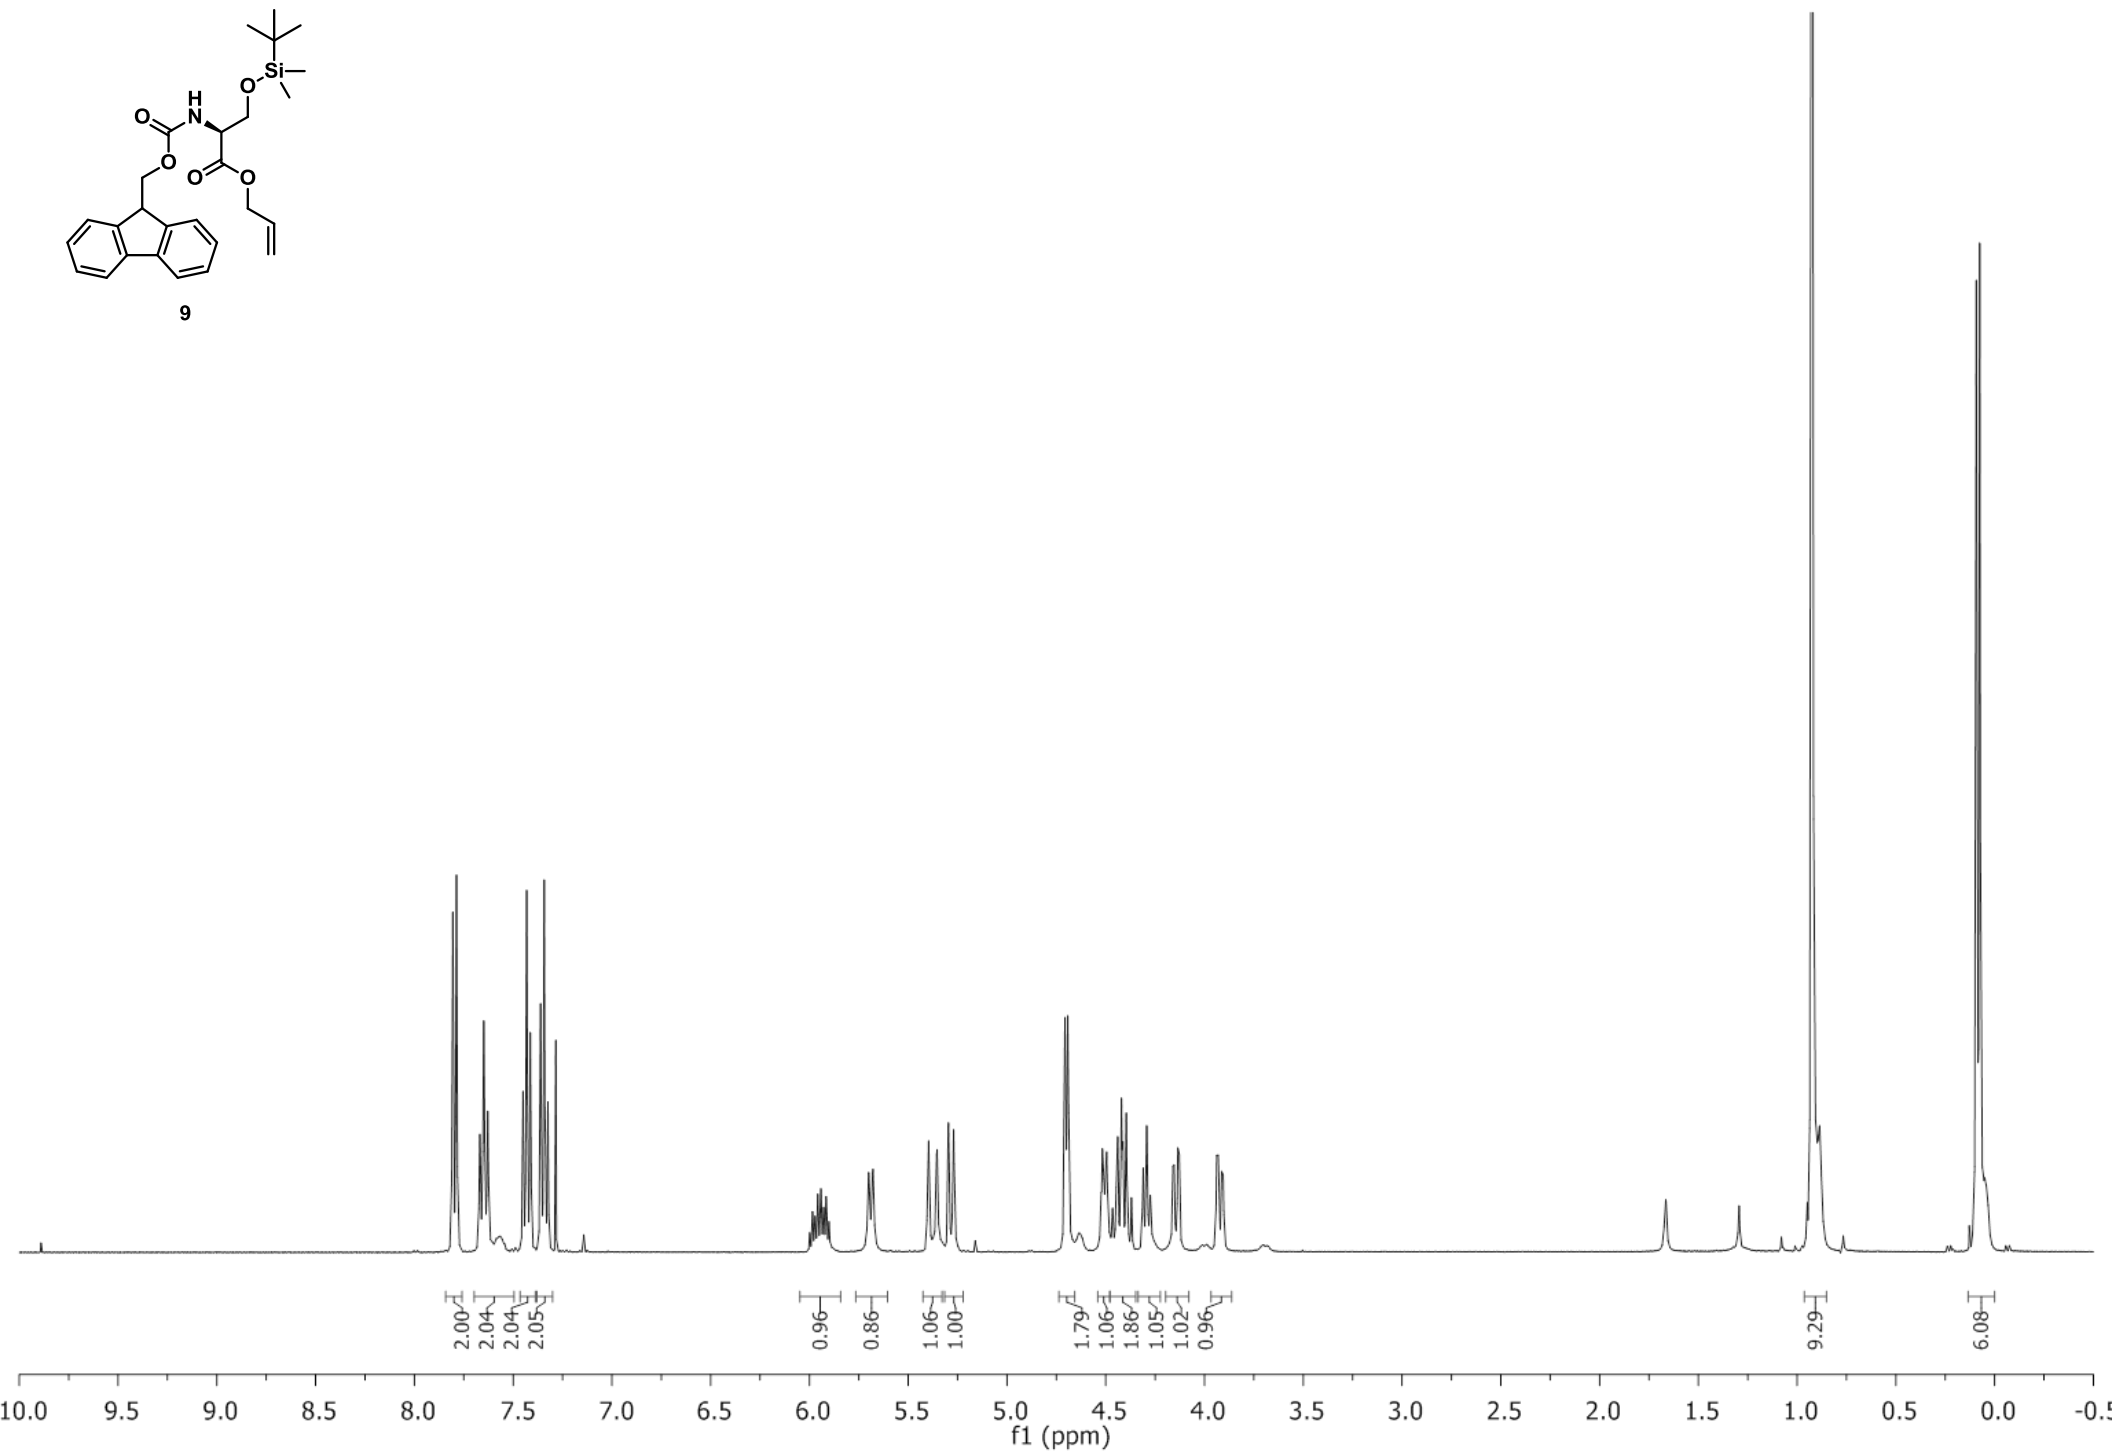

<sup>1</sup>H NMR (CDCl<sub>3</sub>, 400 MHz) of compound **9**.

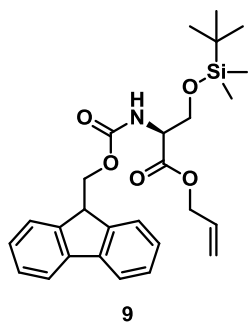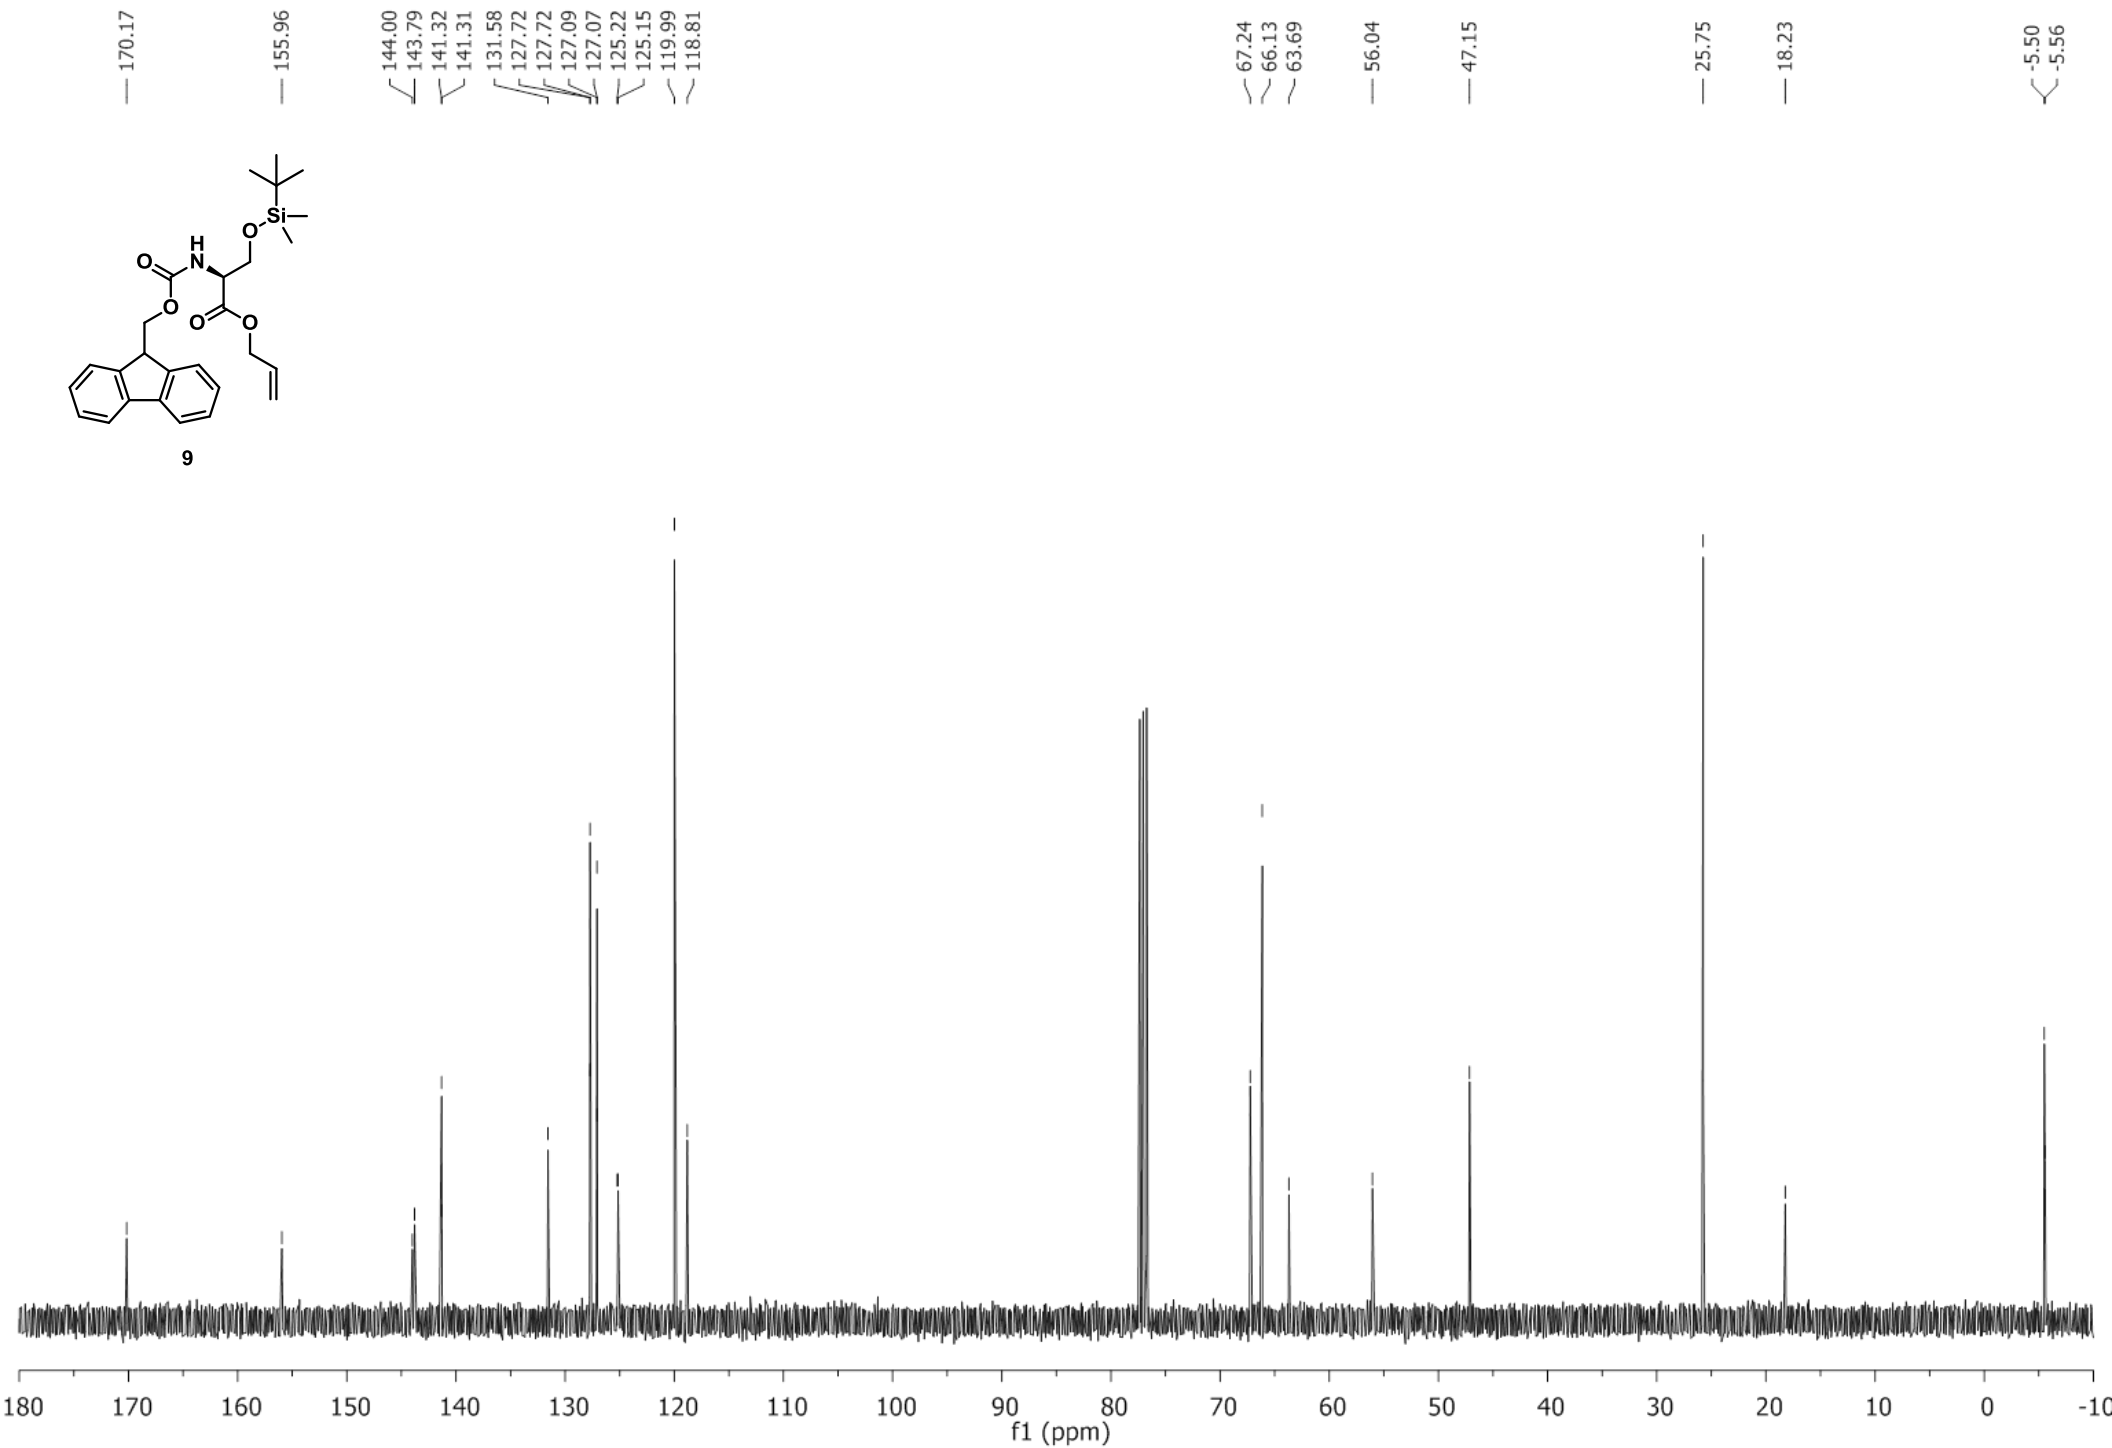

$^{13}\text{C}$  NMR ( $\text{CDCl}_3$ , 101 MHz) of compound **9**.

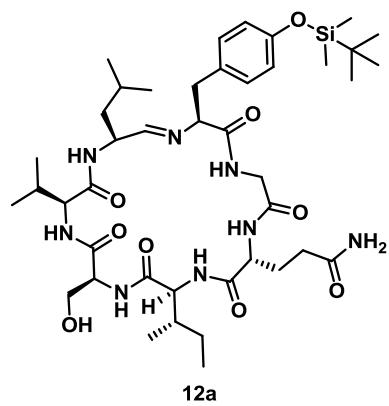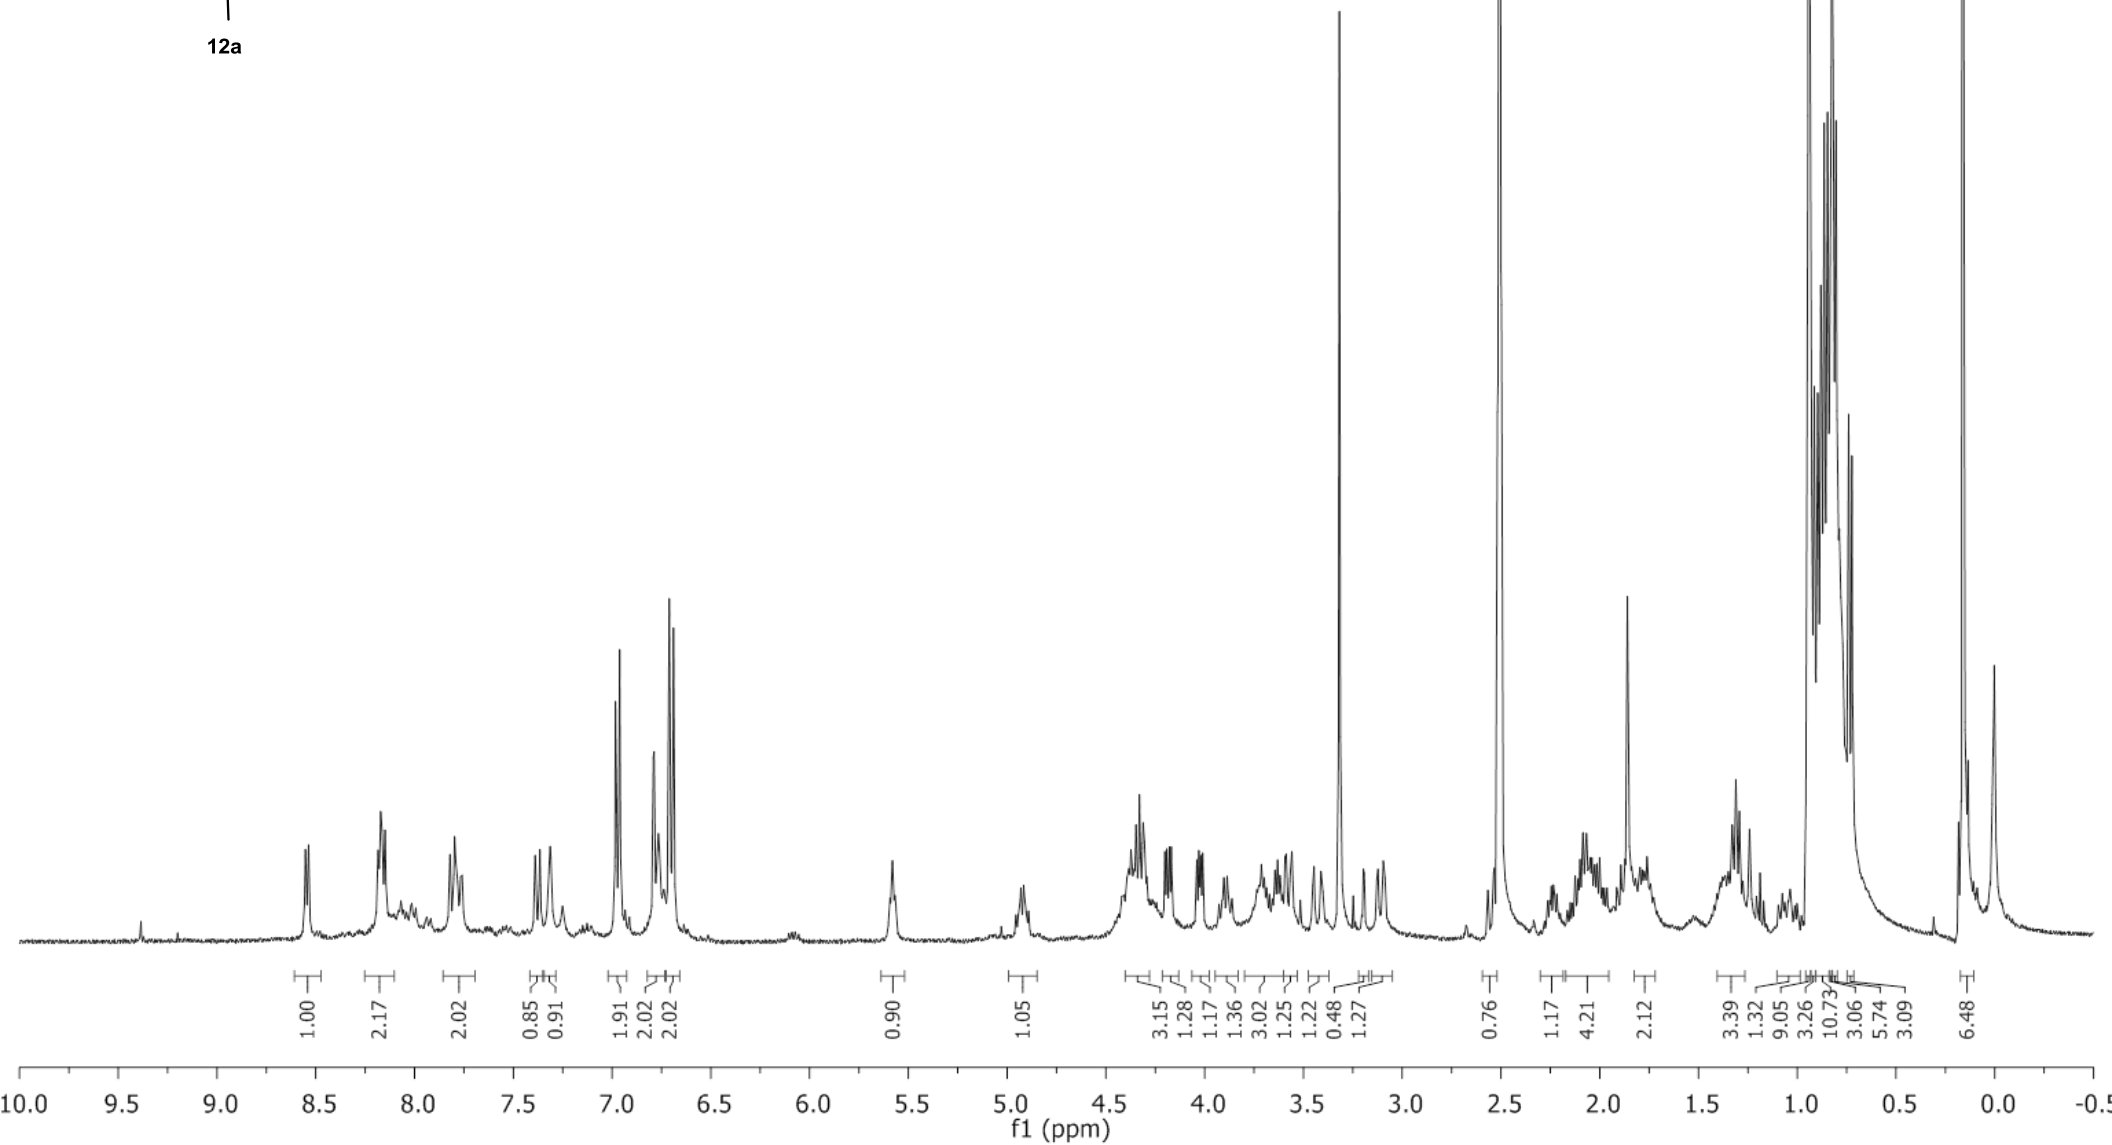

$^1\text{H}$  NMR ( $d_6$ -DMSO, 400 MHz) of compound **12a**.

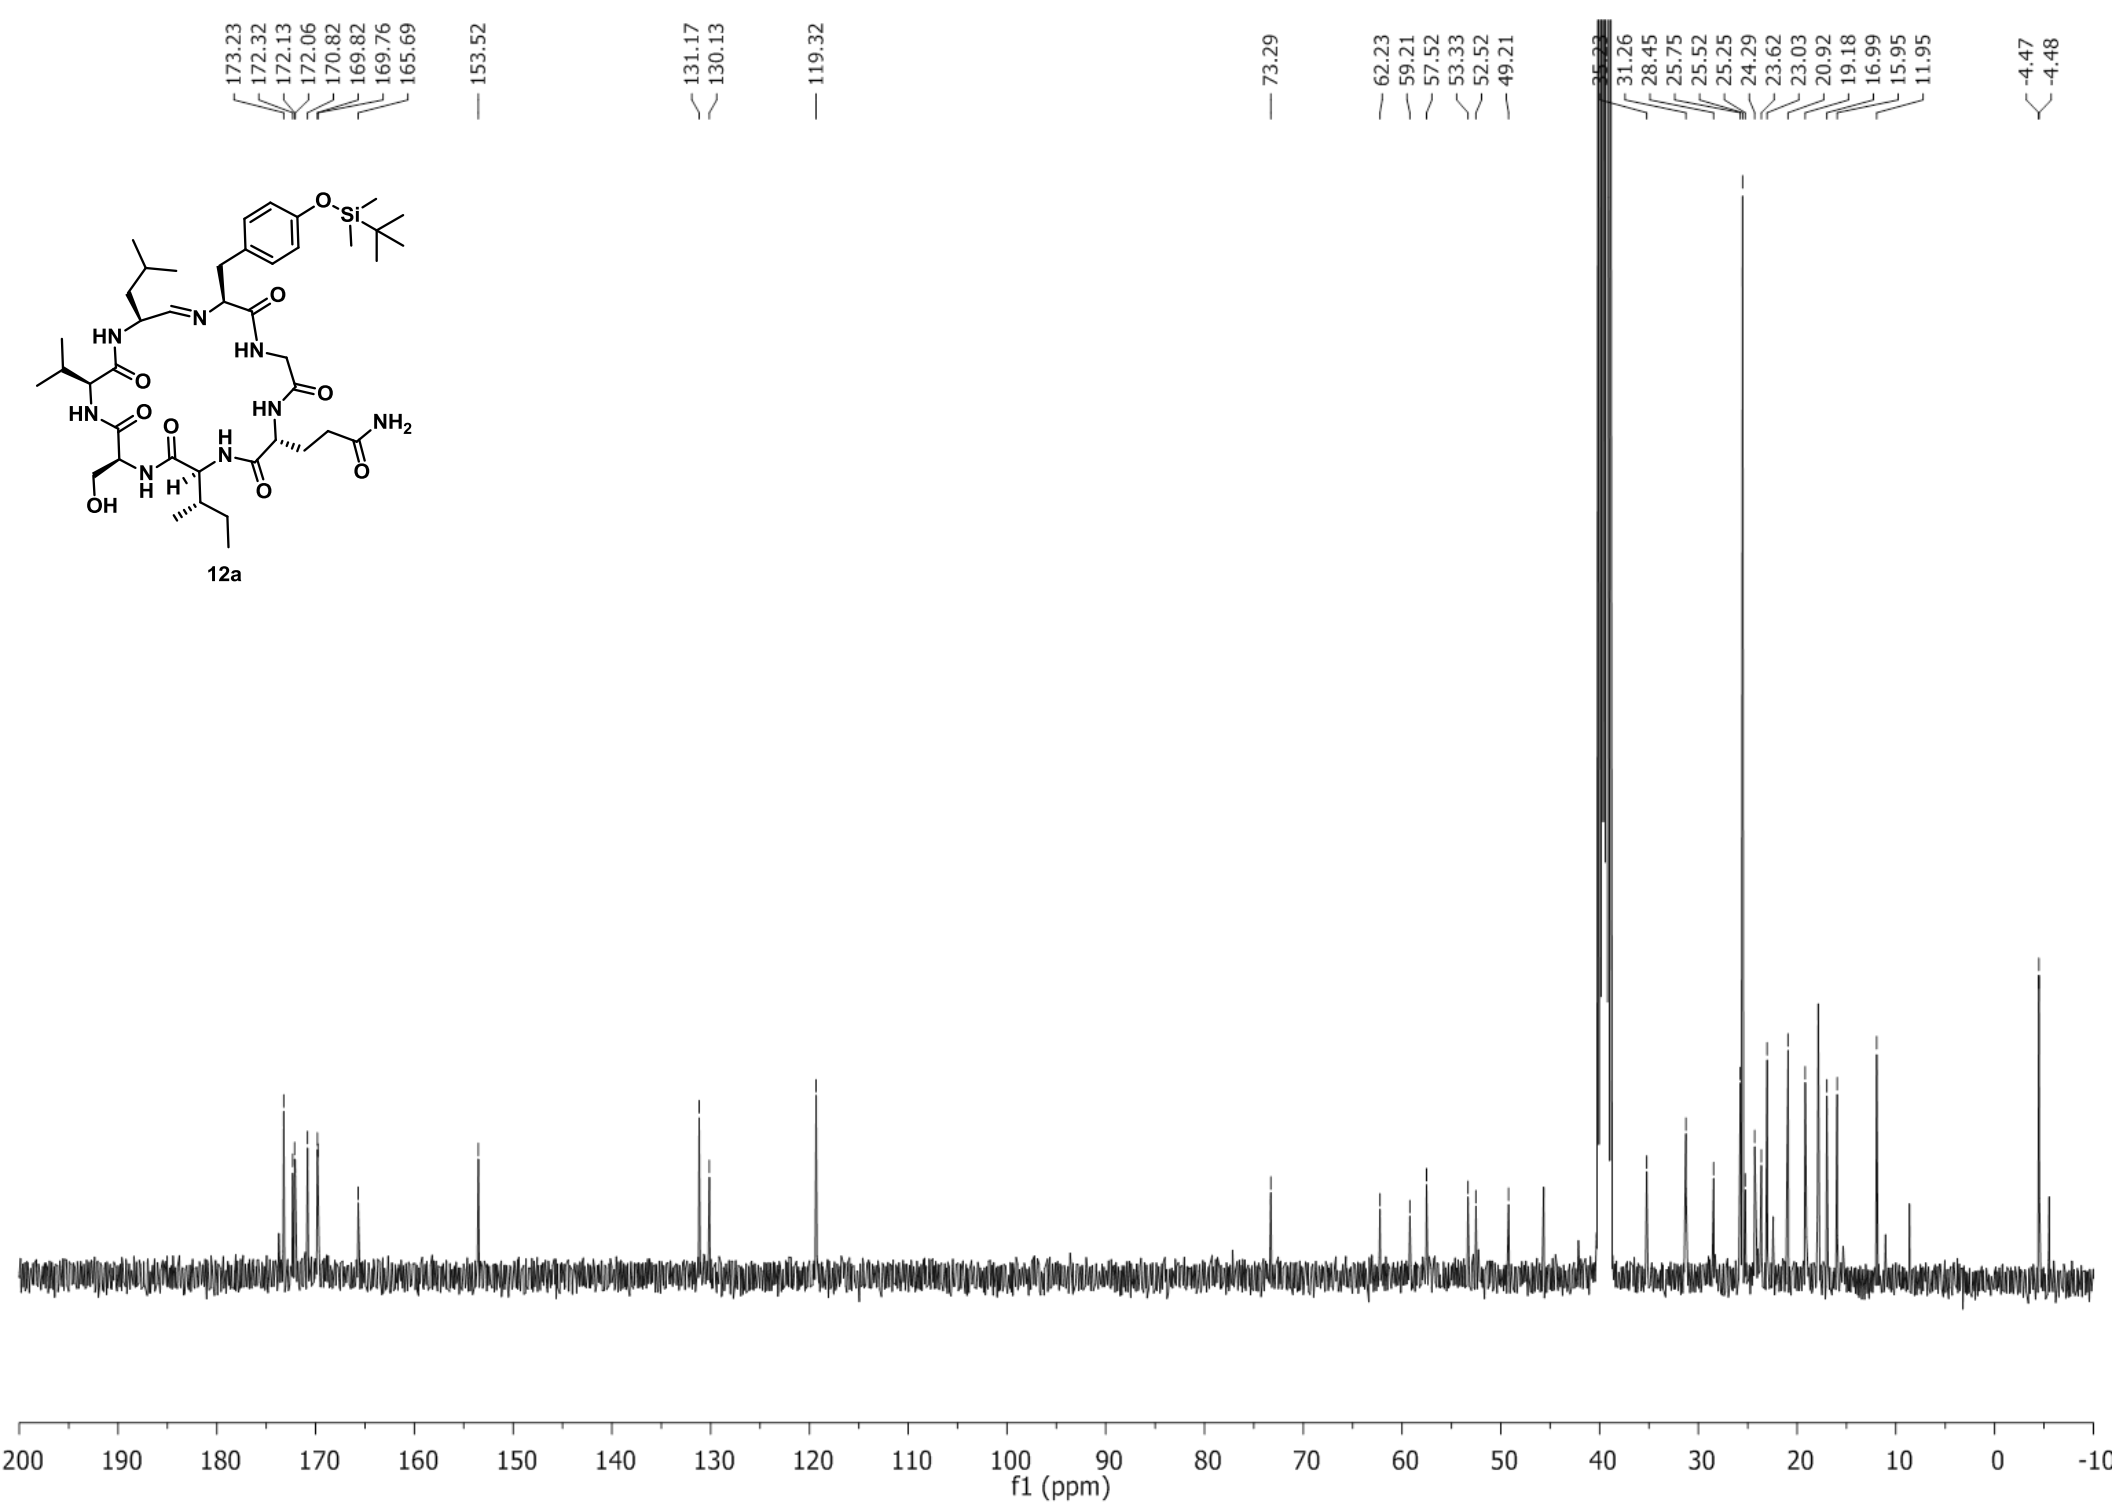

<sup>13</sup>C NMR (d<sub>6</sub>-DMSO, 101 MHz) of compound **12a**.

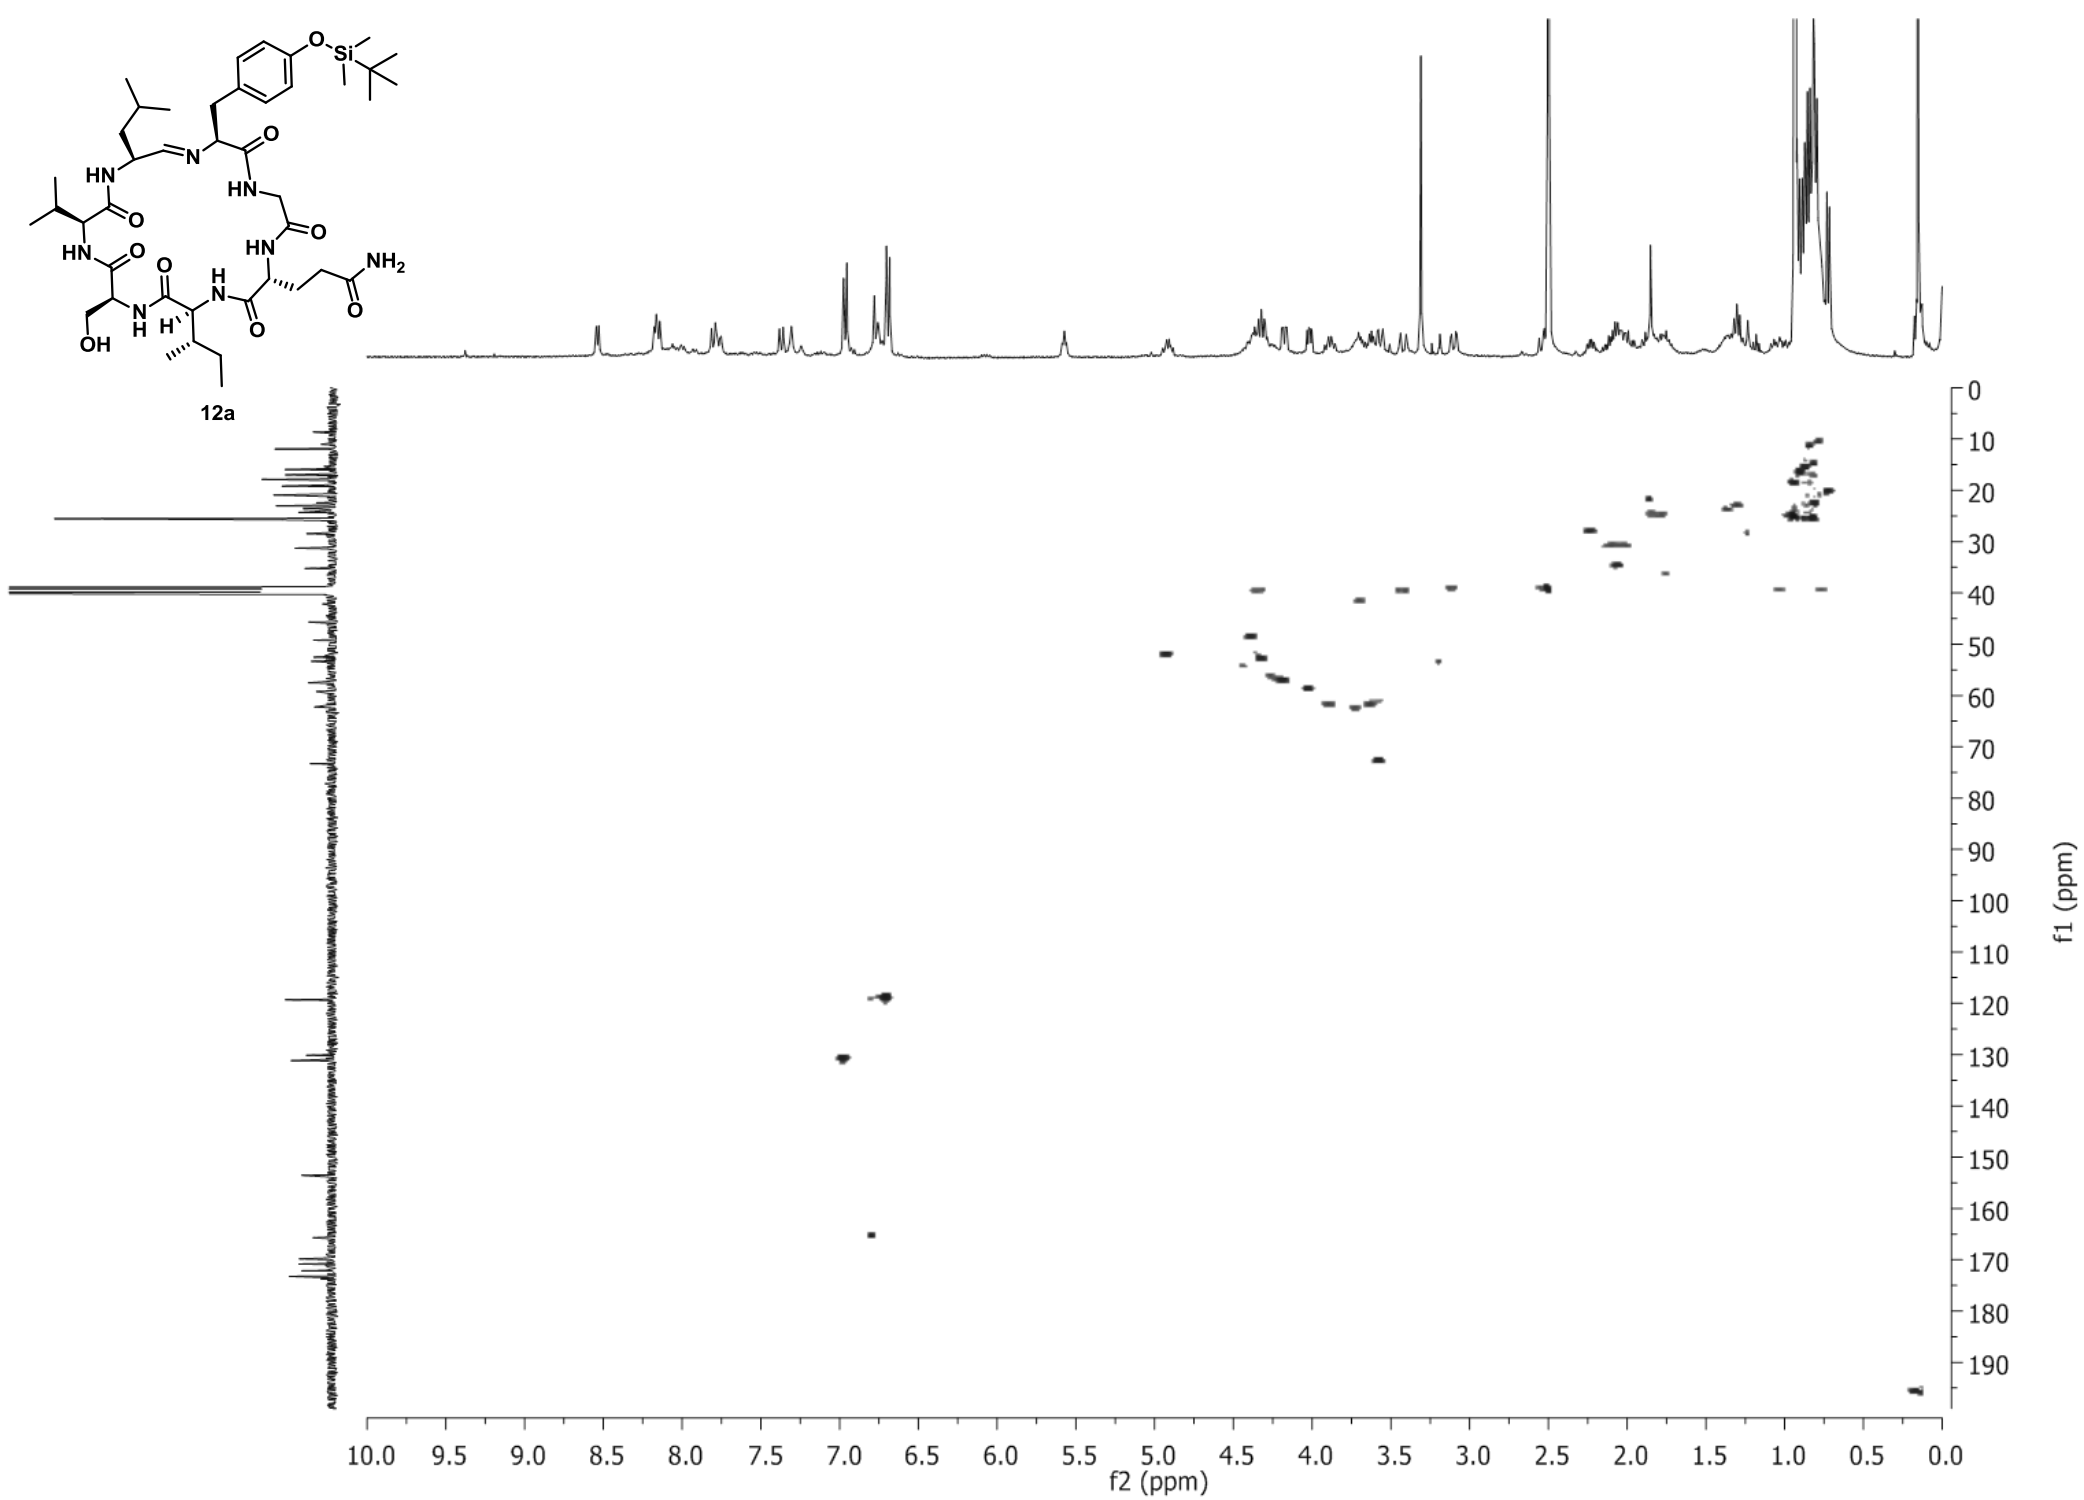

HSQC NMR ( $d_6$ -DMSO, 400 MHz) of compound **12a**.

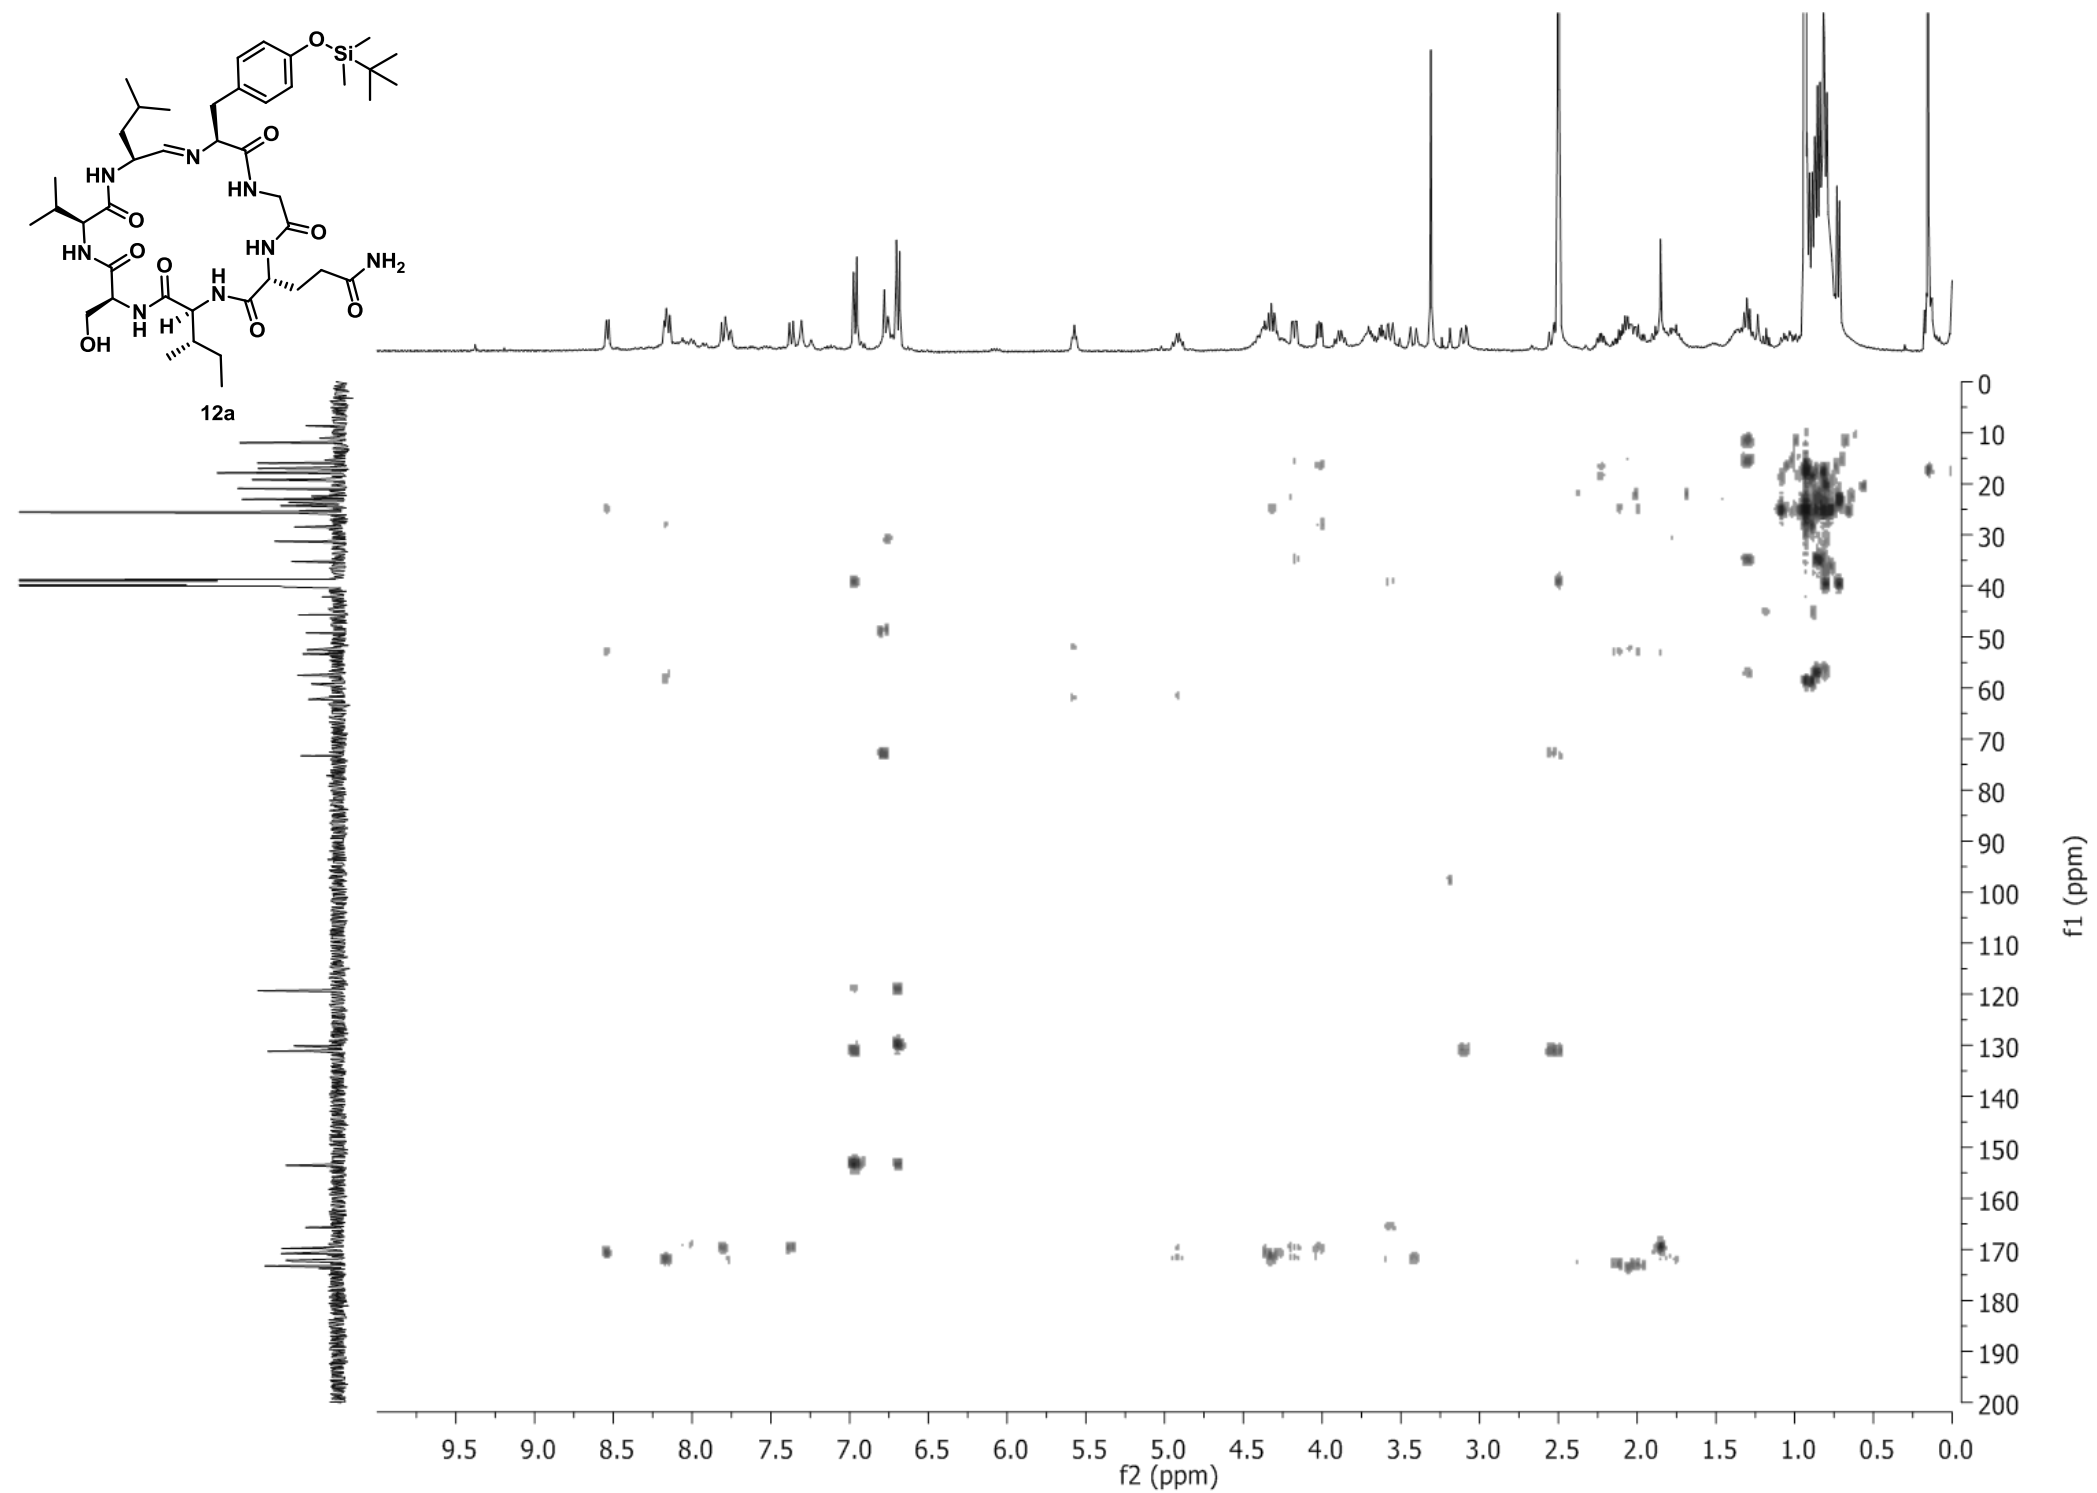

HMBC NMR (*d*<sub>6</sub>-DMSO, 400 MHz) of compound **12a**.

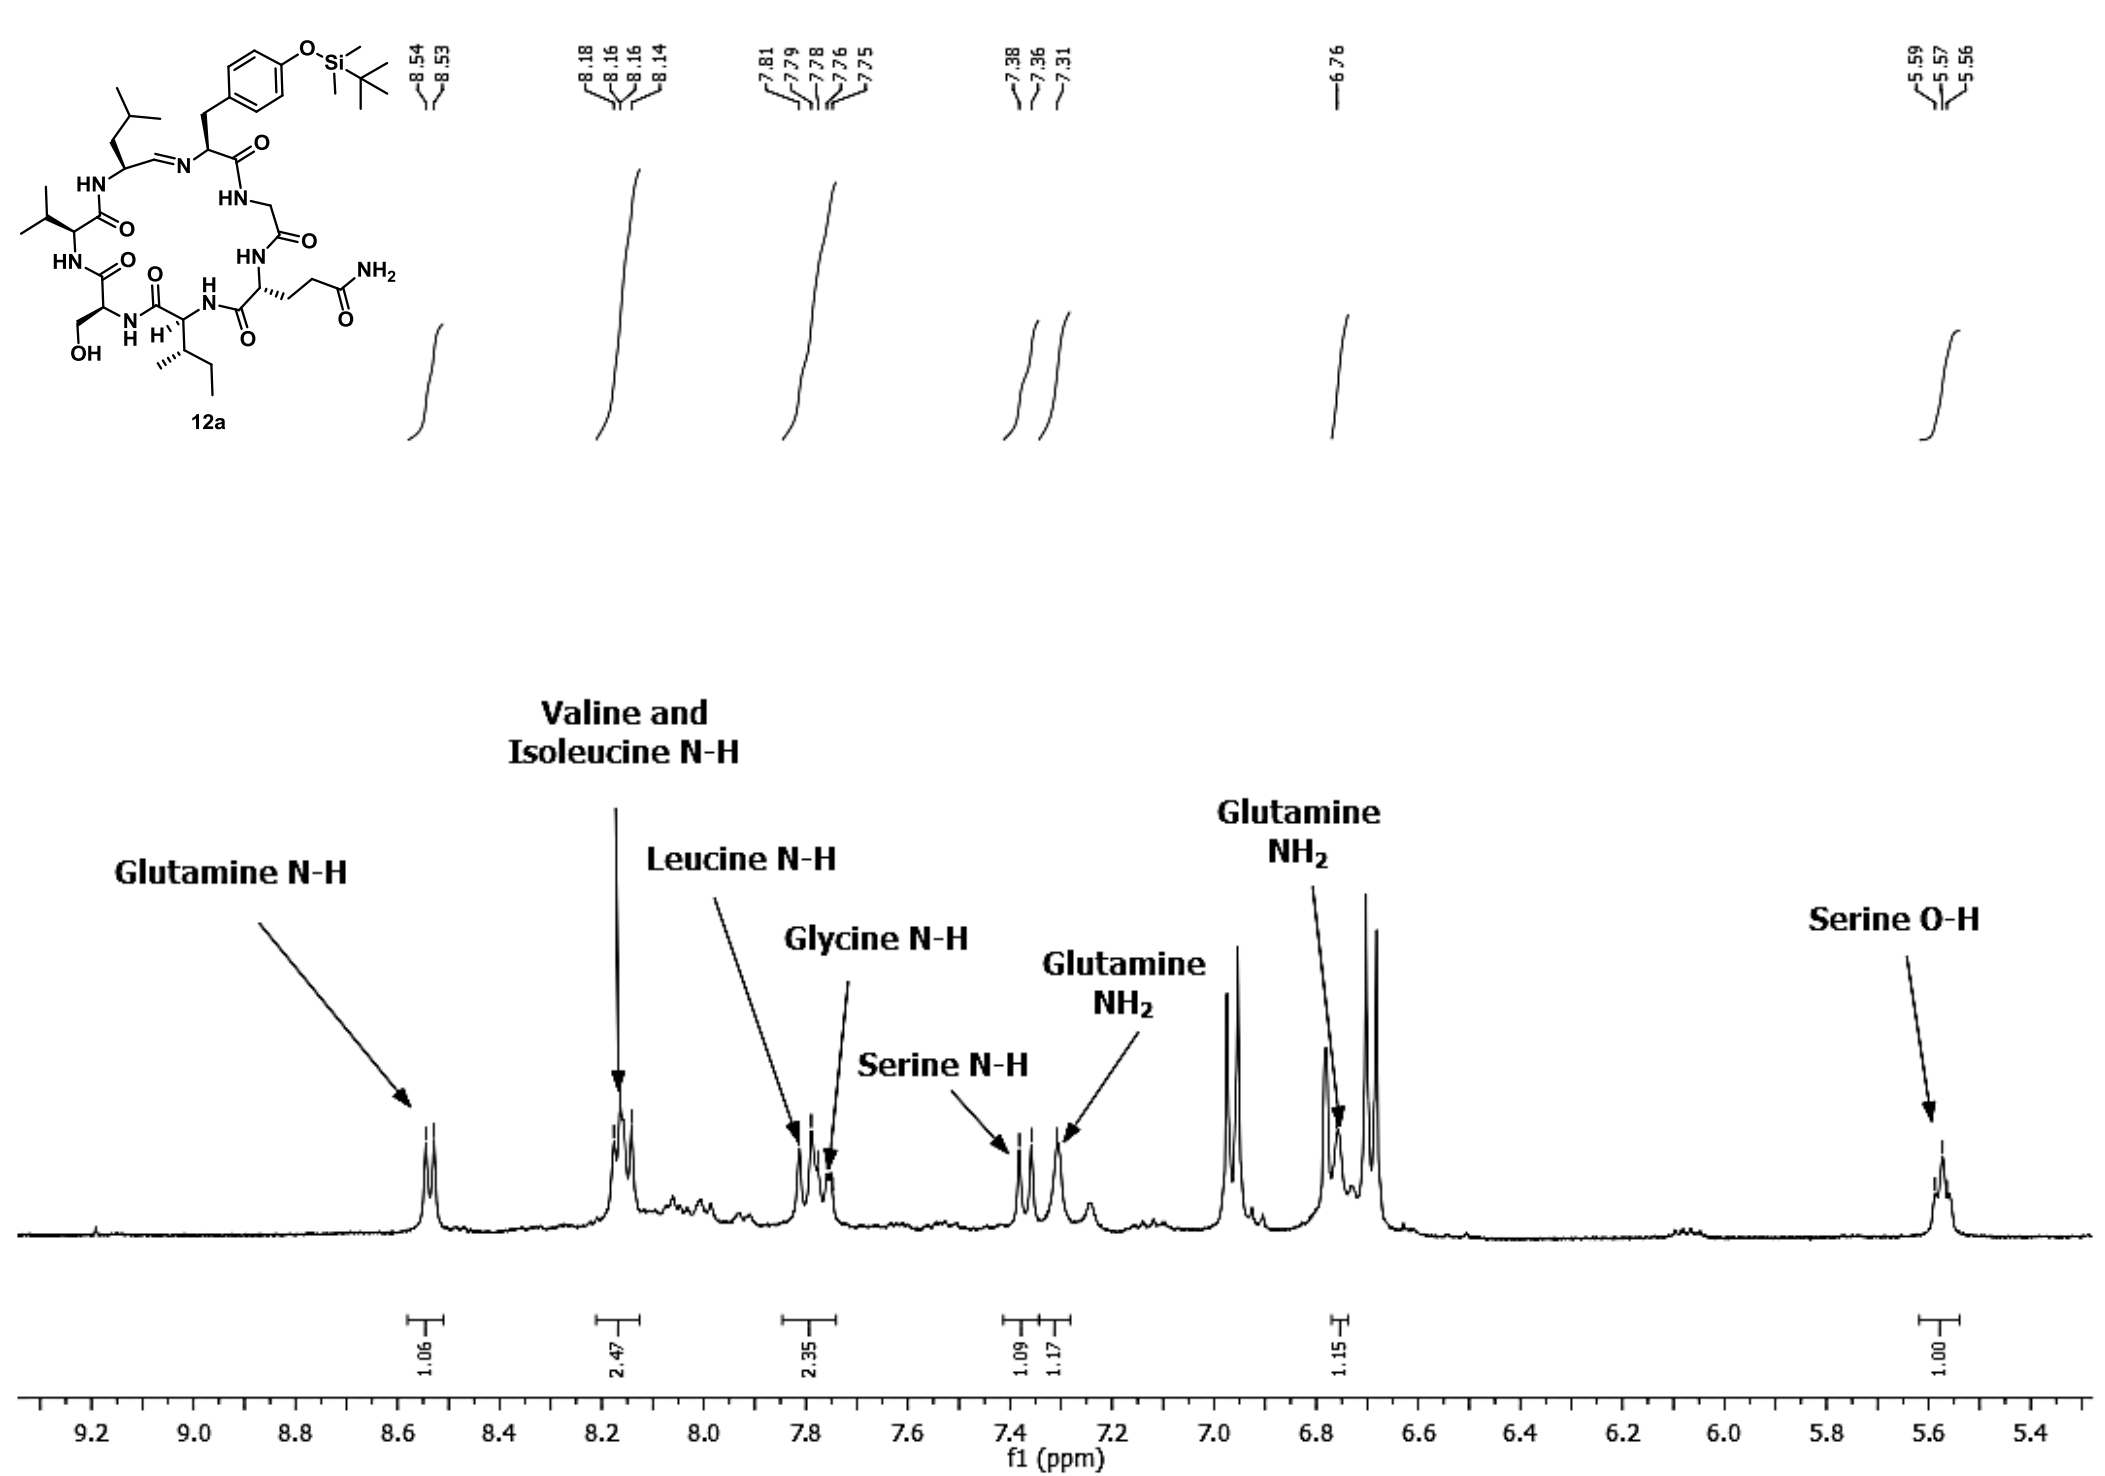

**Figure S1.** Assignment of -NH and -OH protons in  $^1\text{H NMR}$  for **12a**.



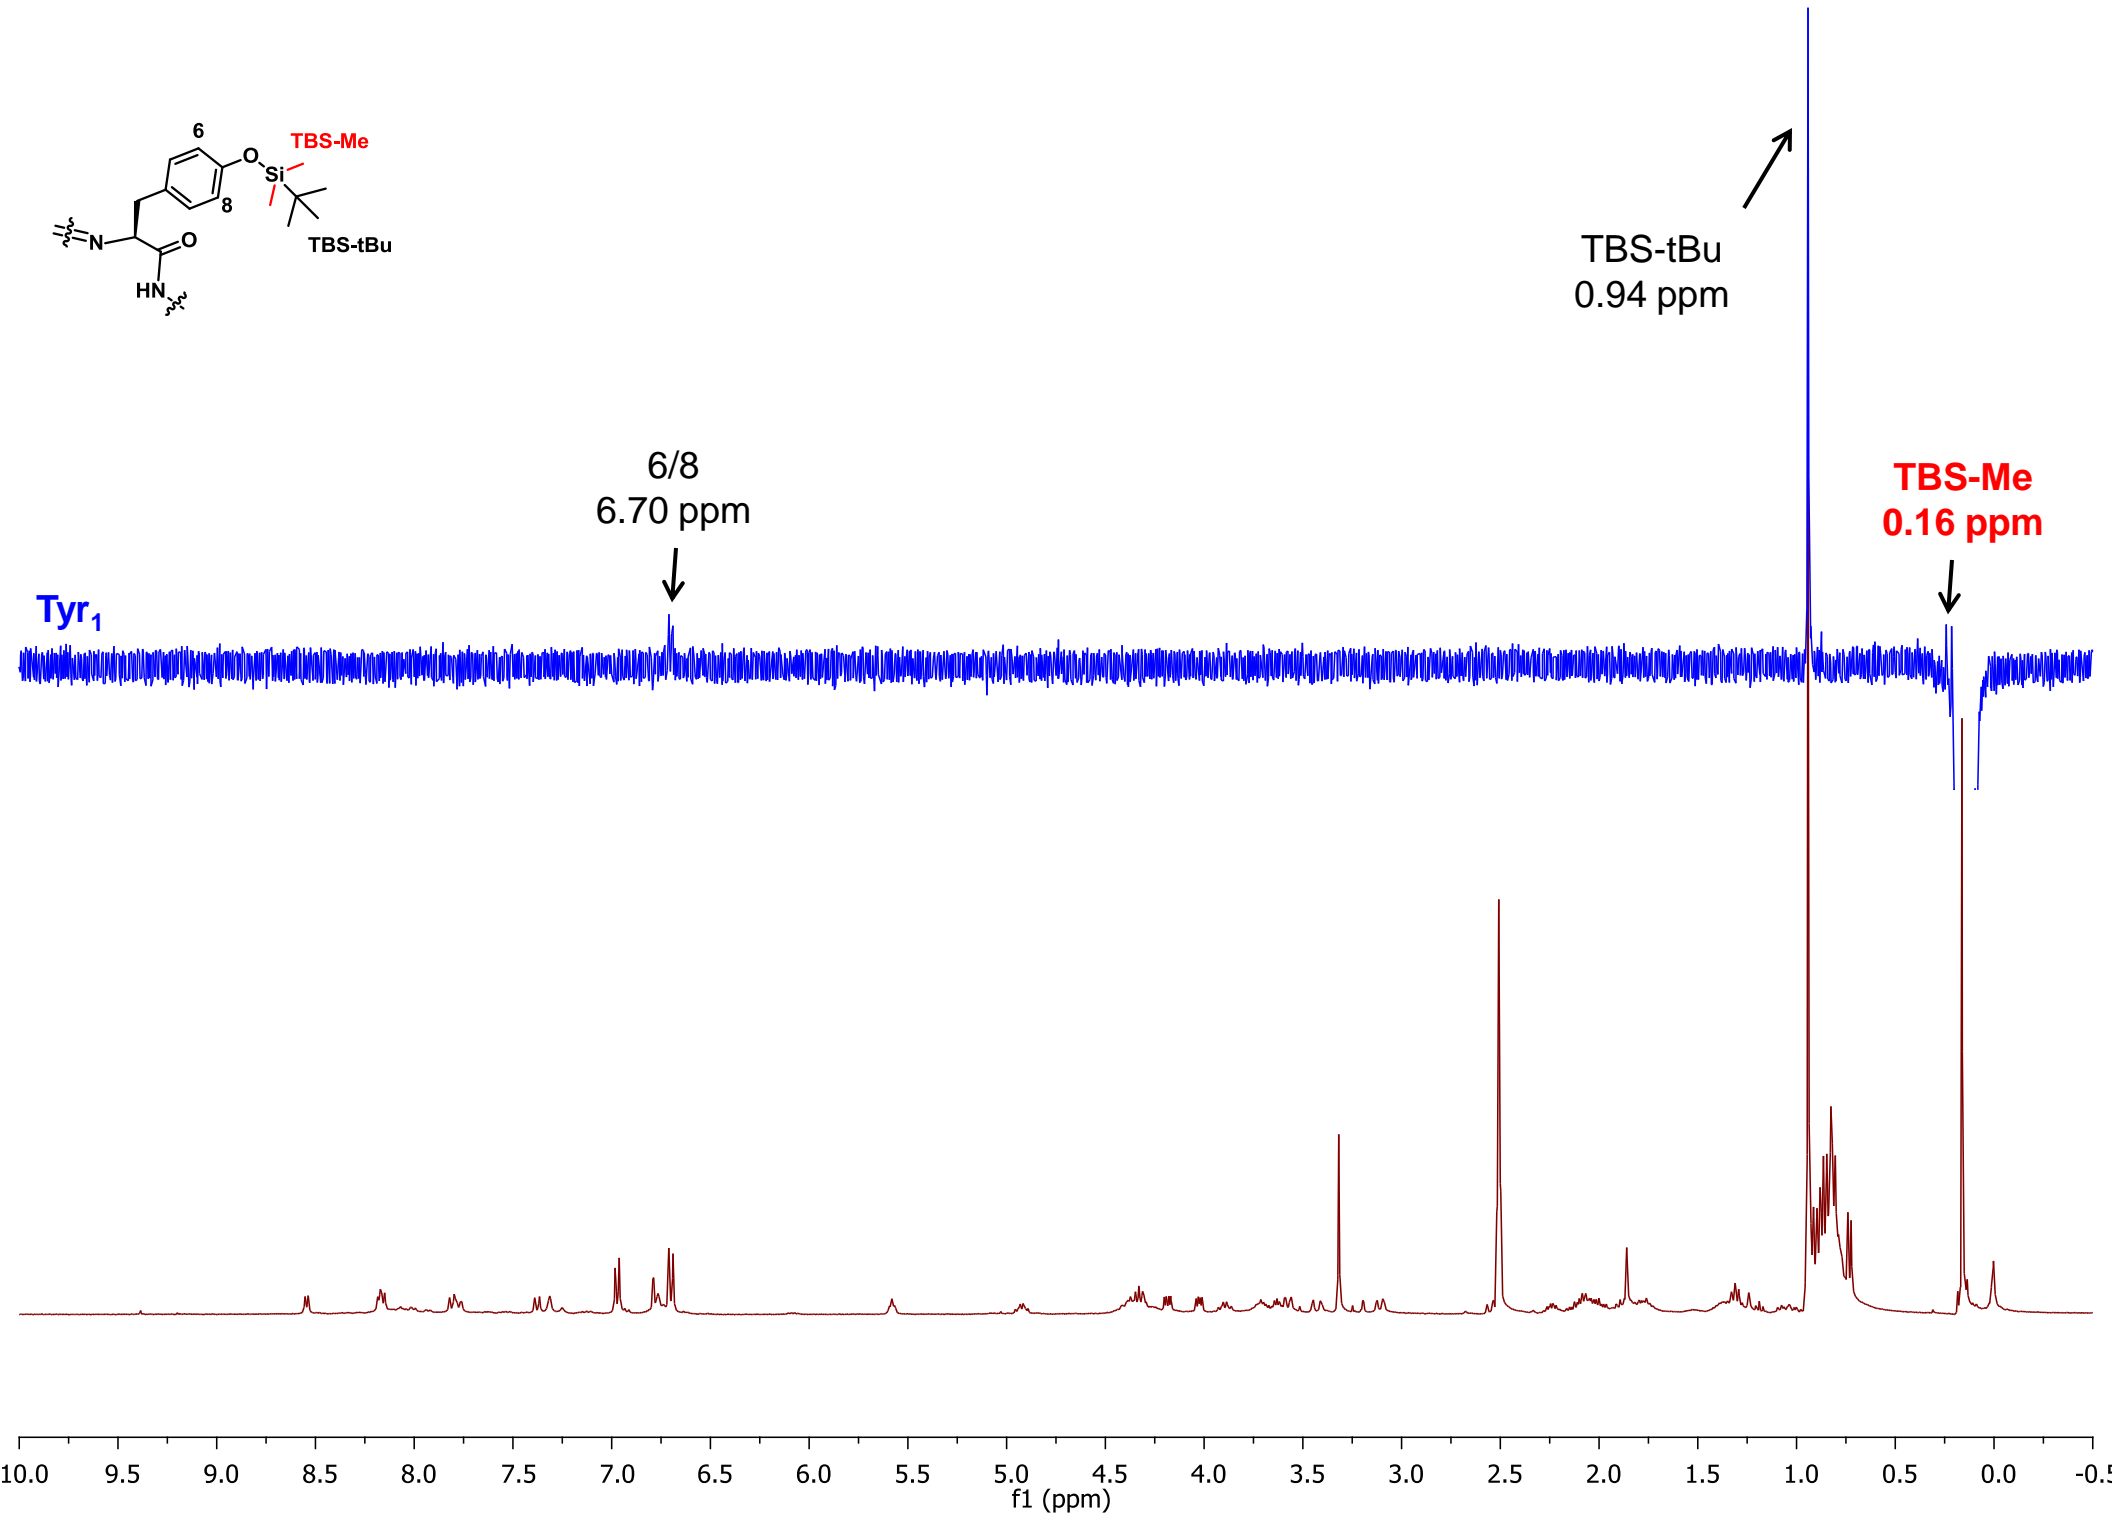

**Figure S2.** Selective NOESY for TBS-Me (0.16 ppm) for **12a**.

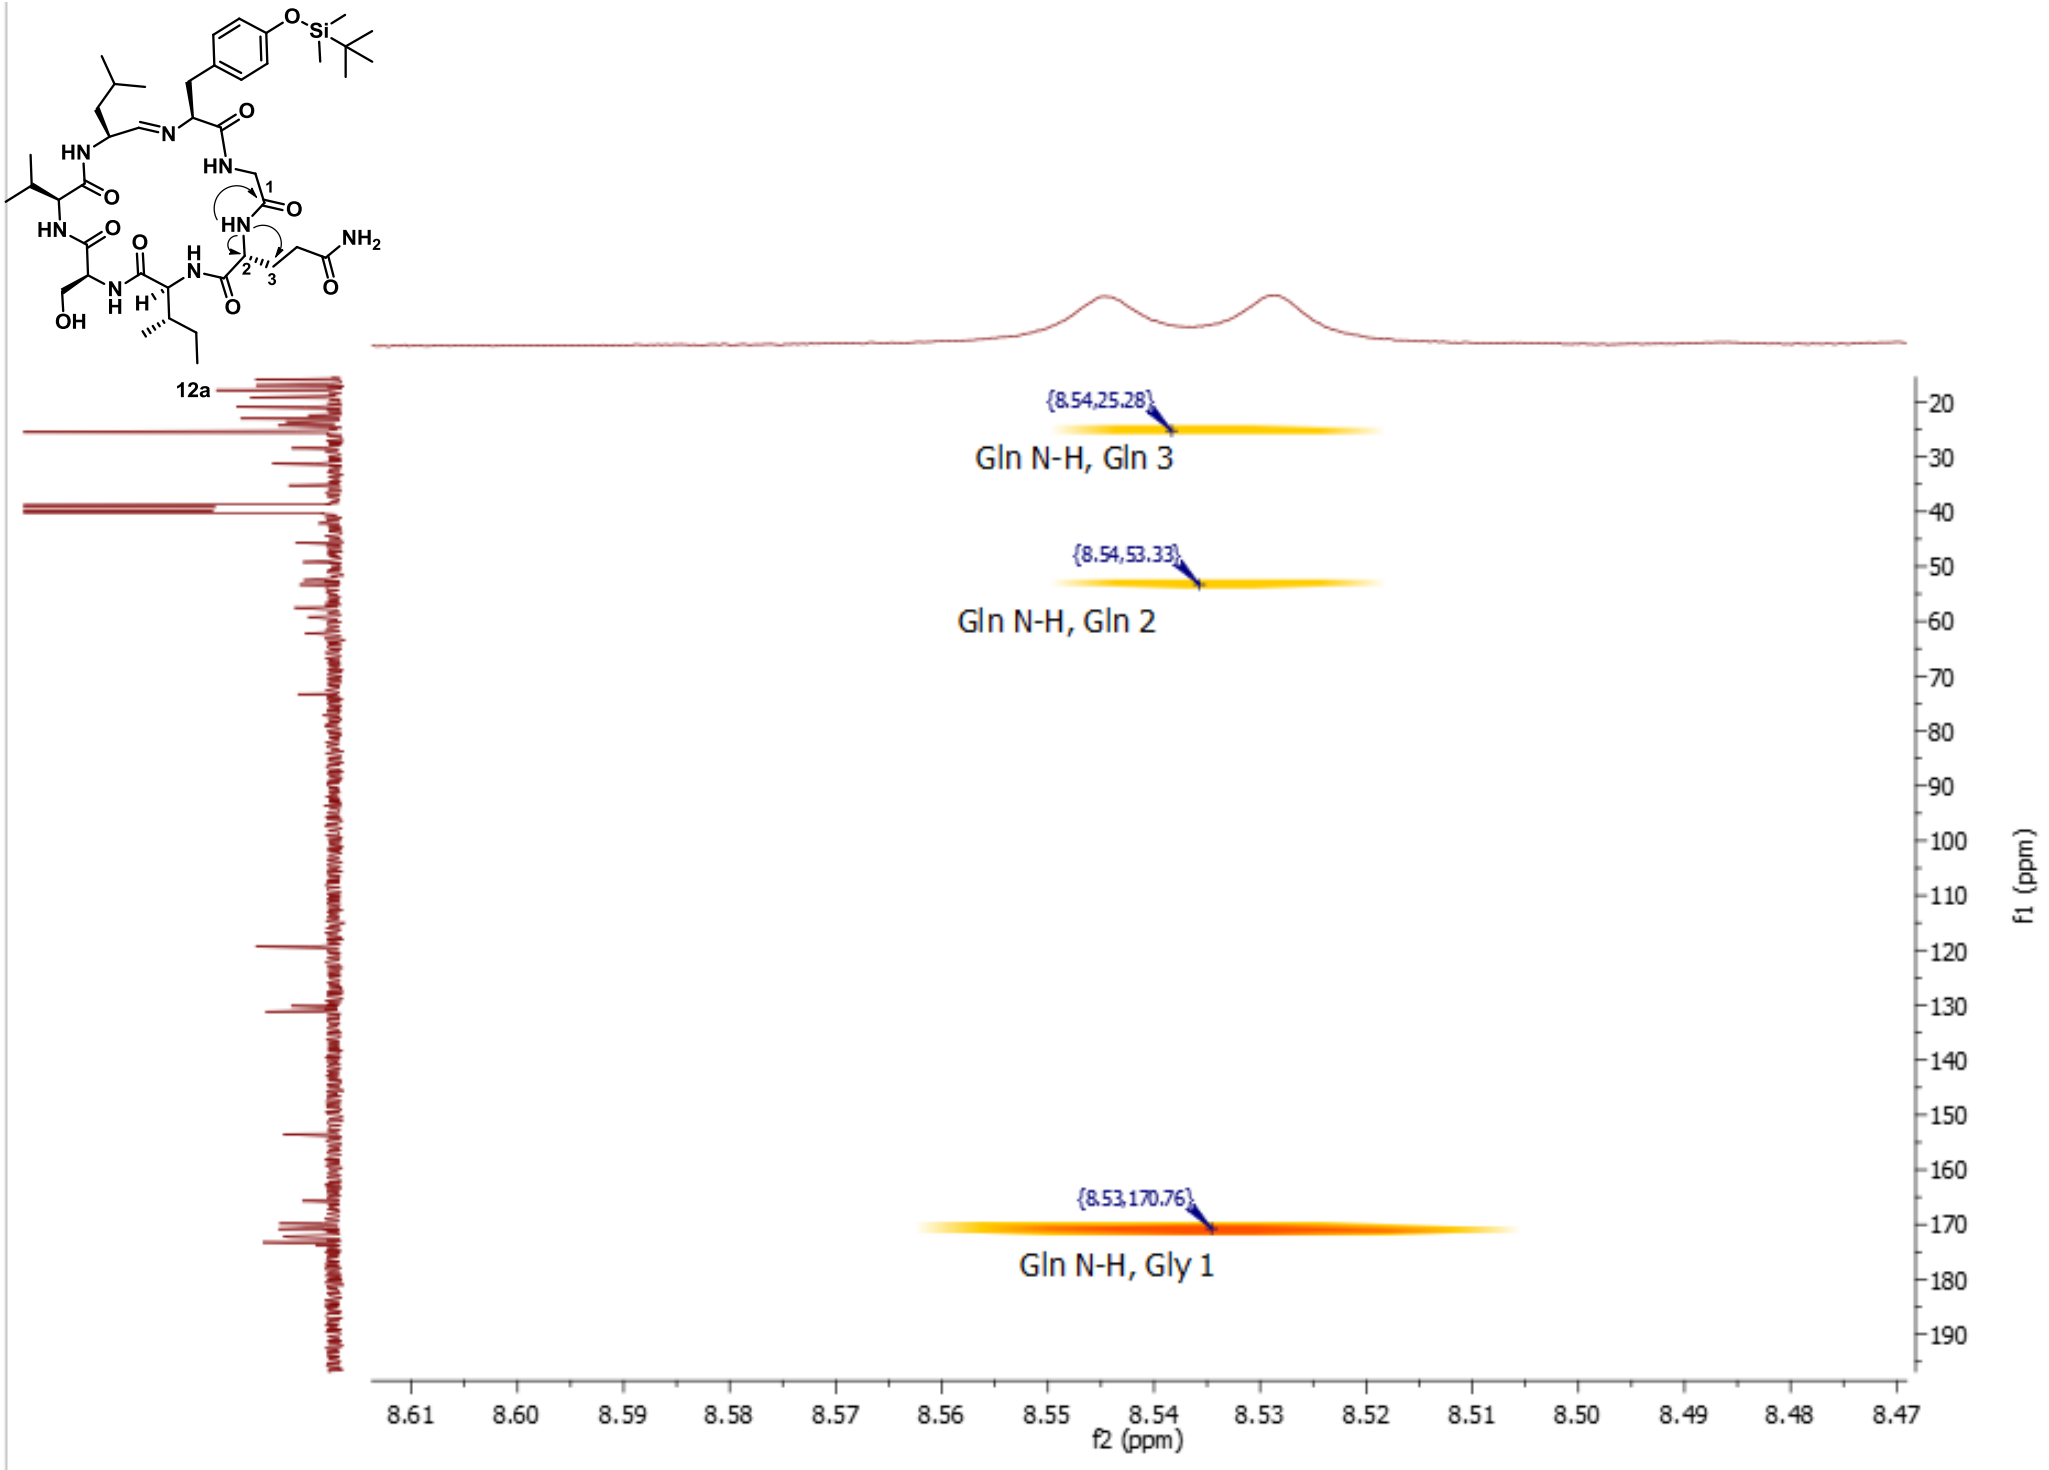

**Figure S3.** D-Gln<sub>3</sub> backbone –NH HMBC correlations for **12a**.

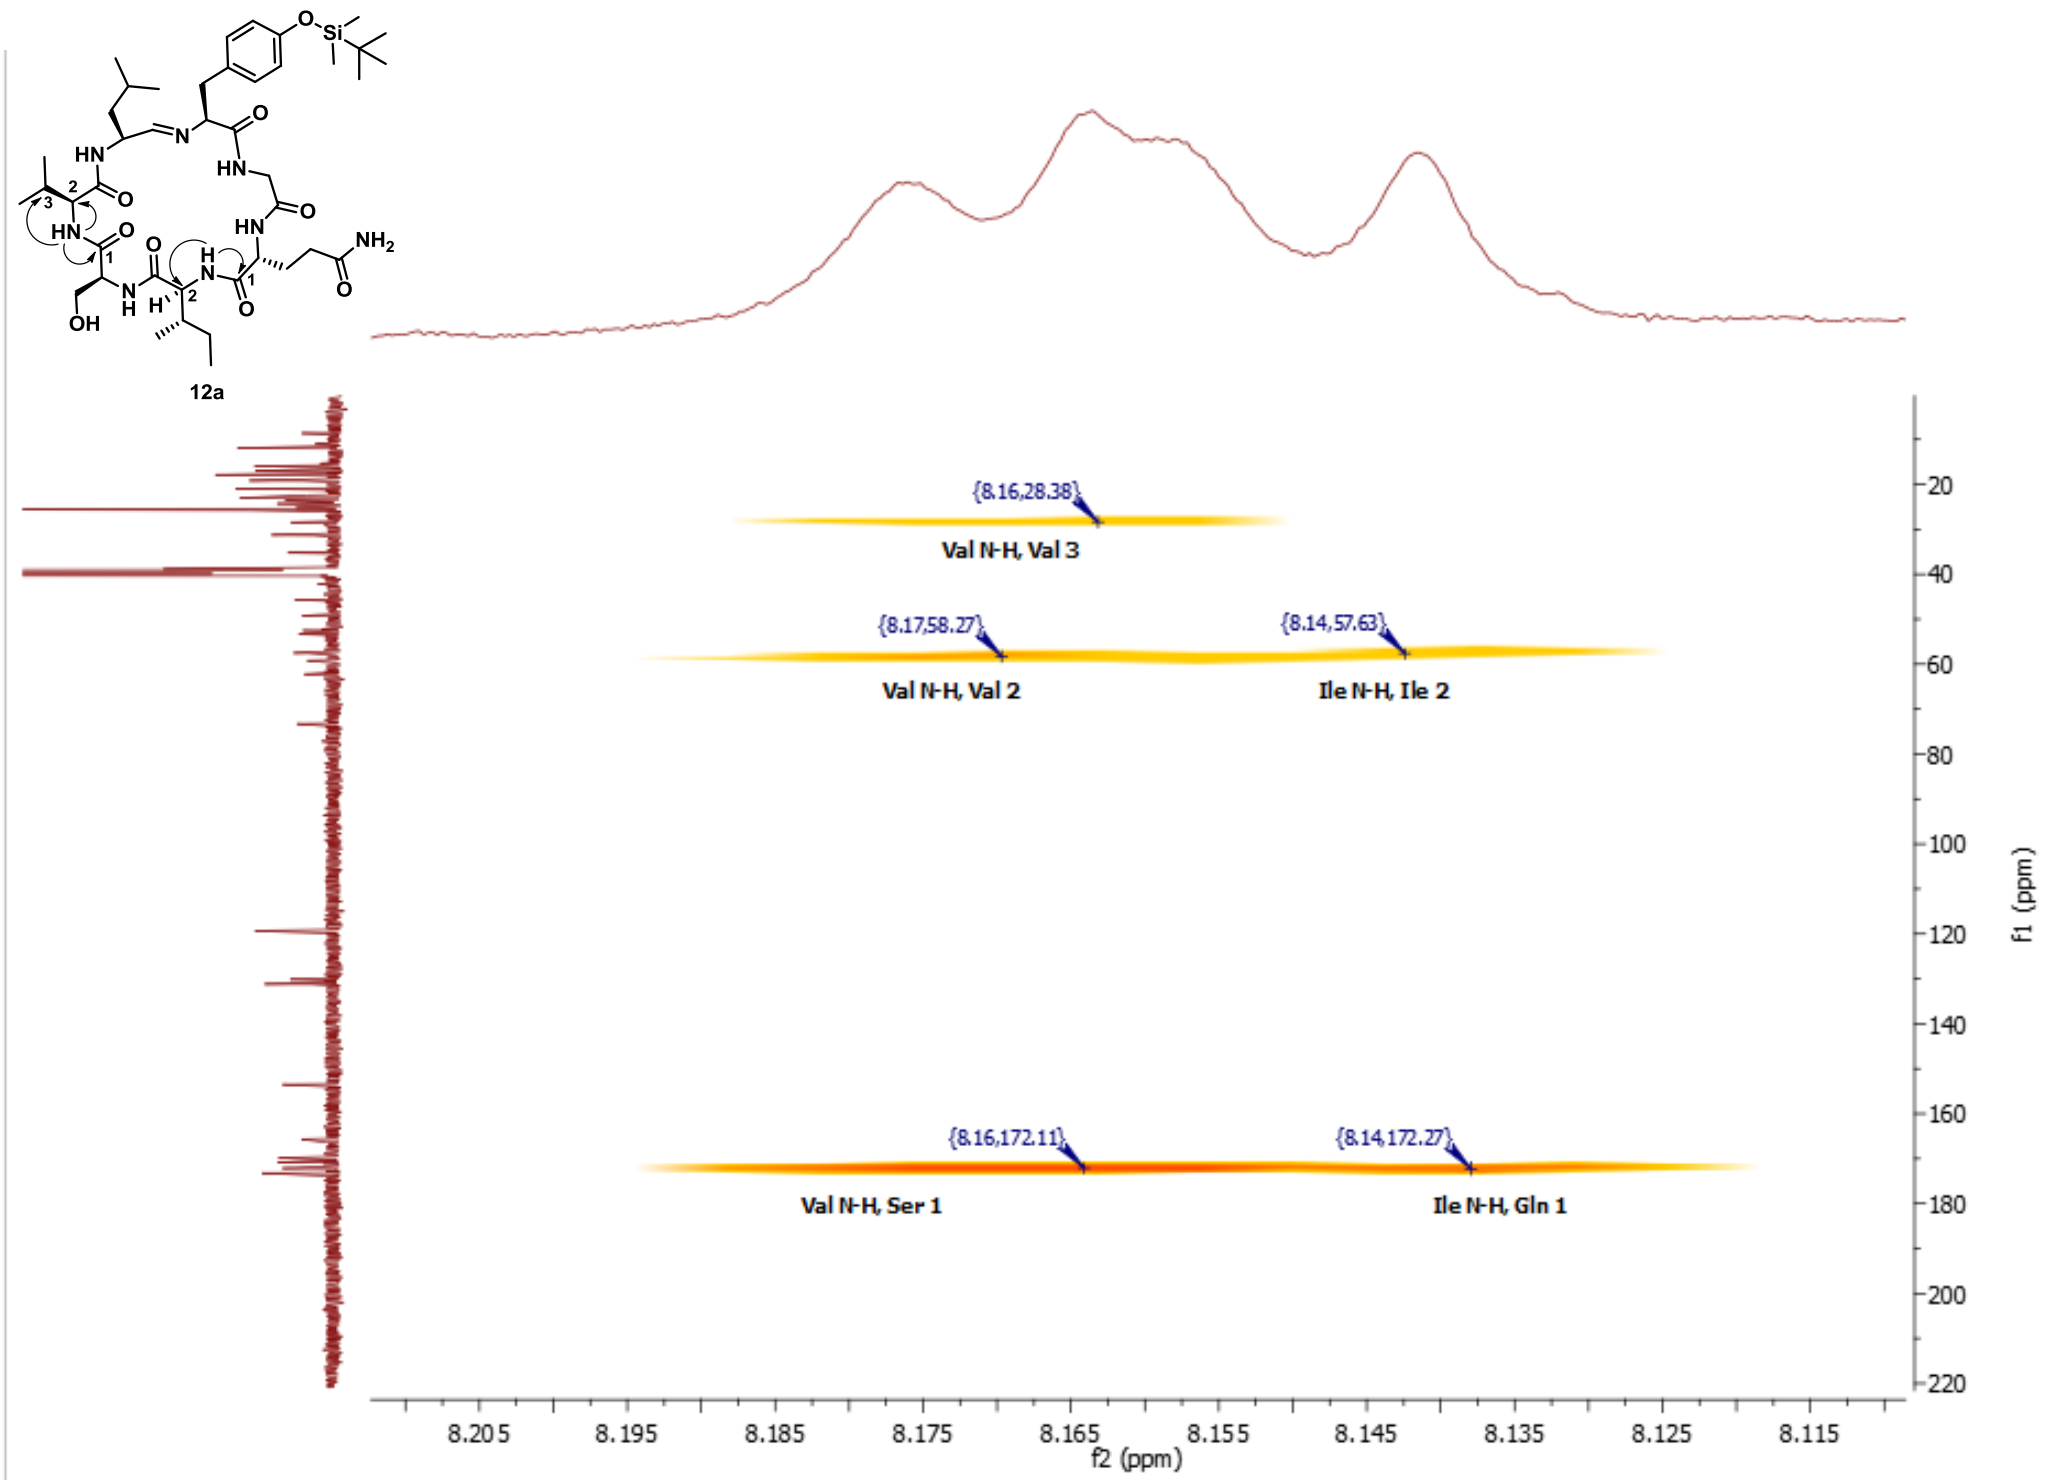

**Figure S4.** Val<sub>6</sub> and Ile<sub>4</sub> backbone -NH HMBC correlations for **12a**.

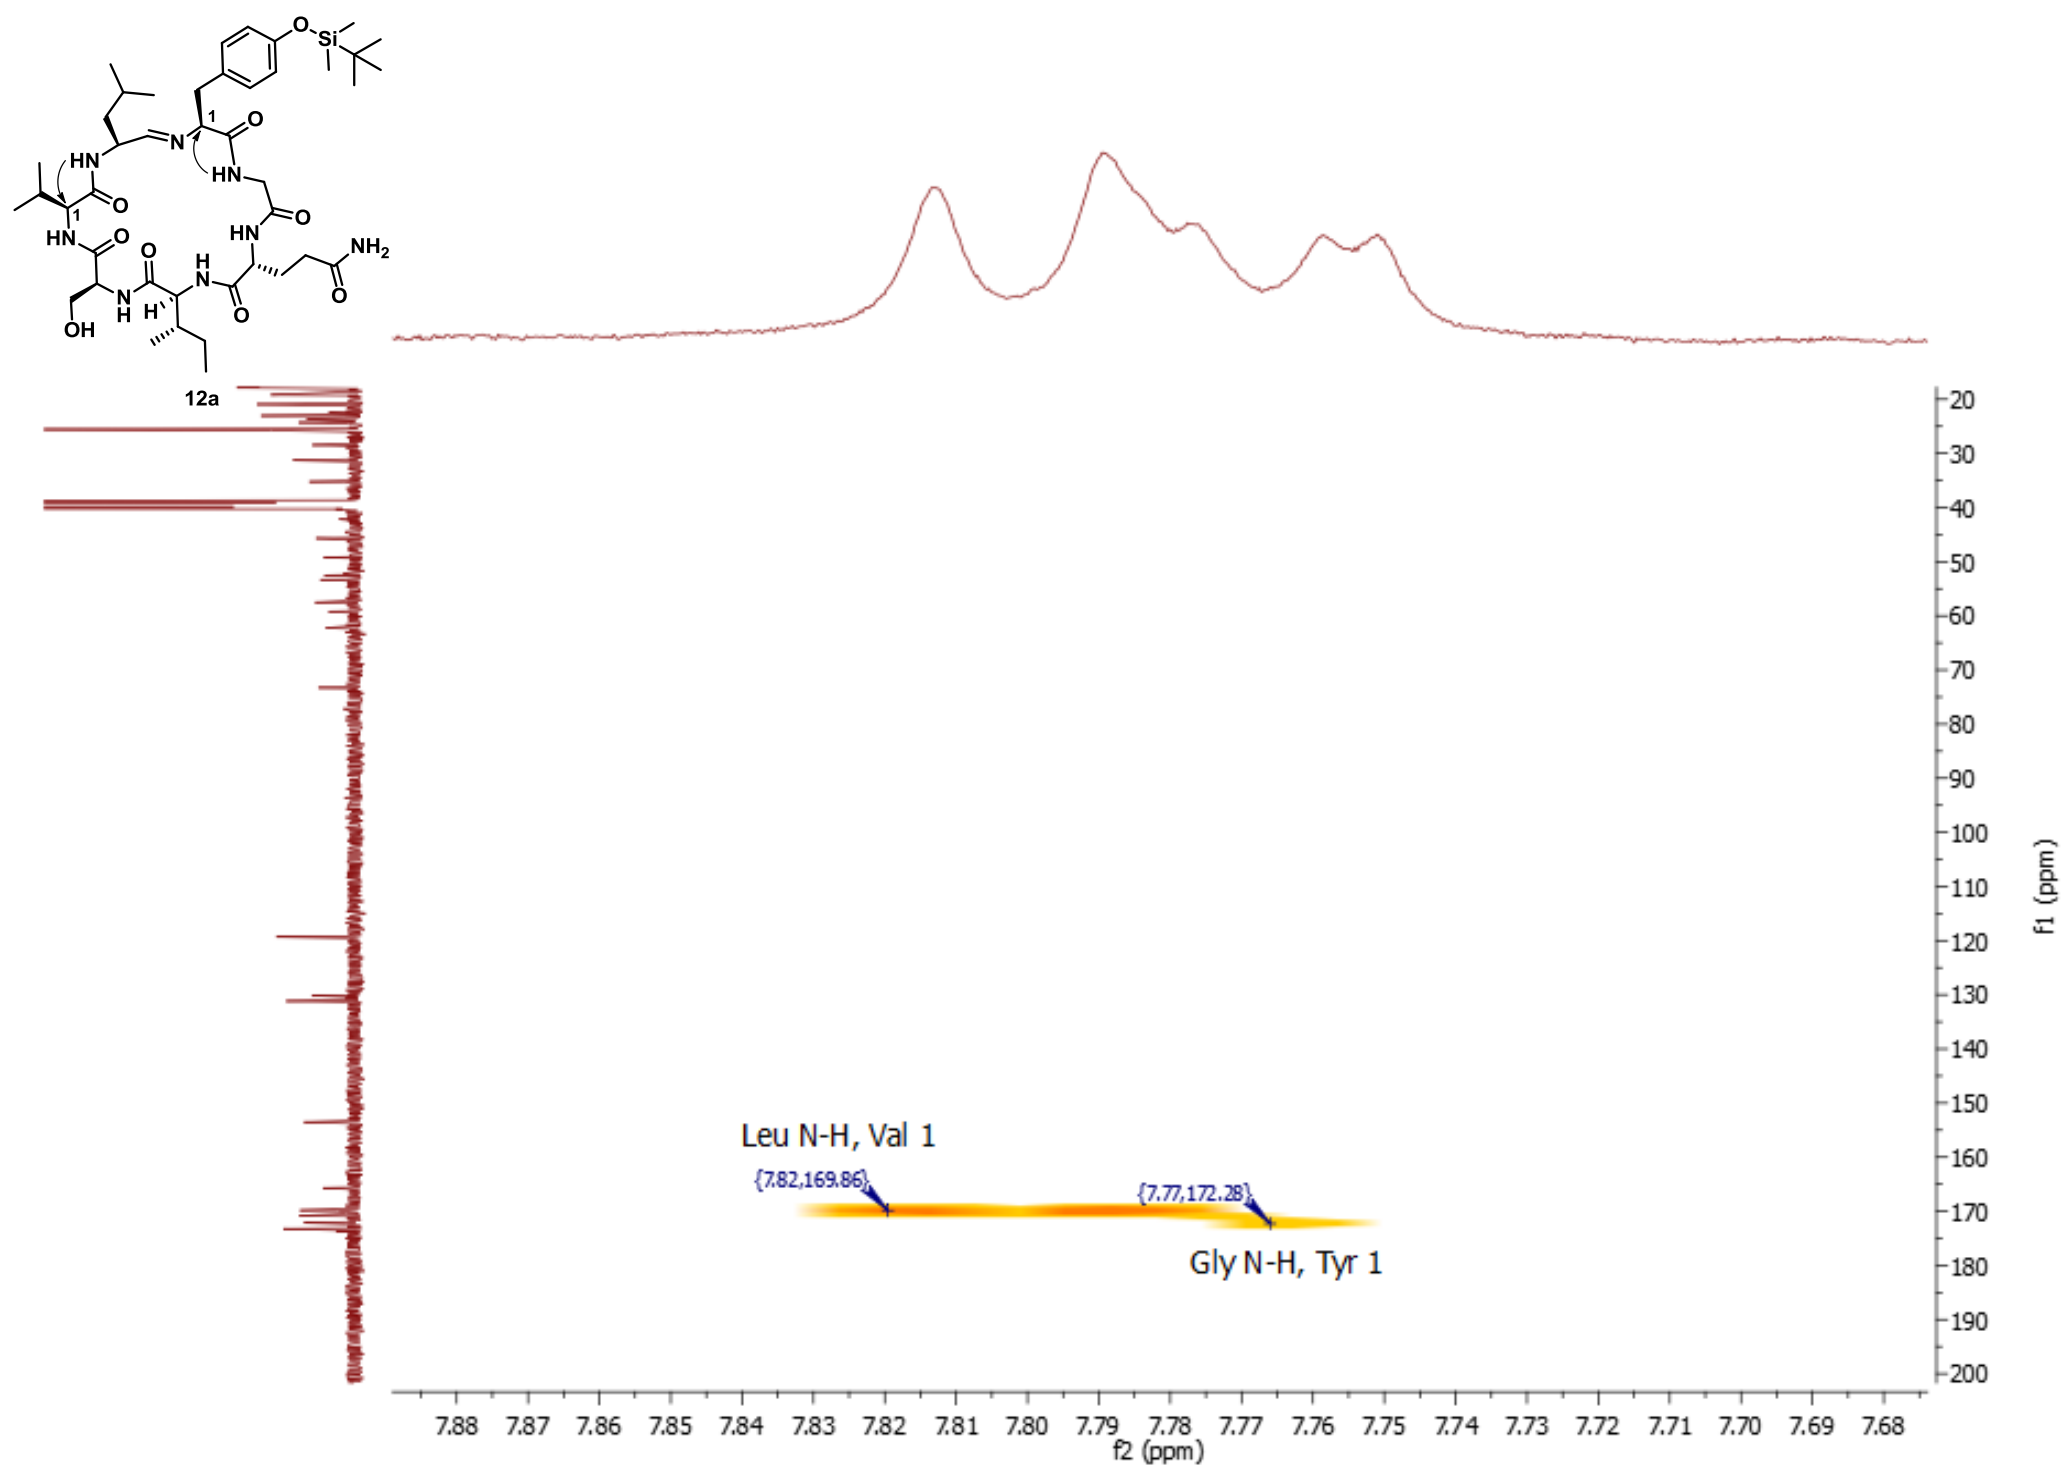

**Figure S5.** Leu<sub>7</sub> and Gly<sub>2</sub> backbone –NH HMBC correlations for **12a**.

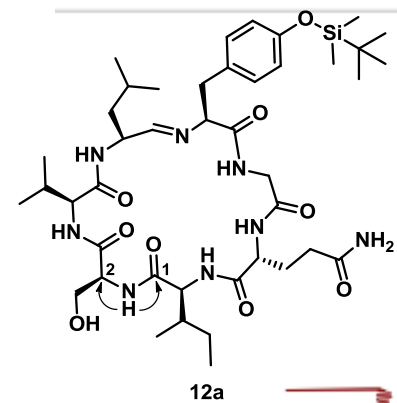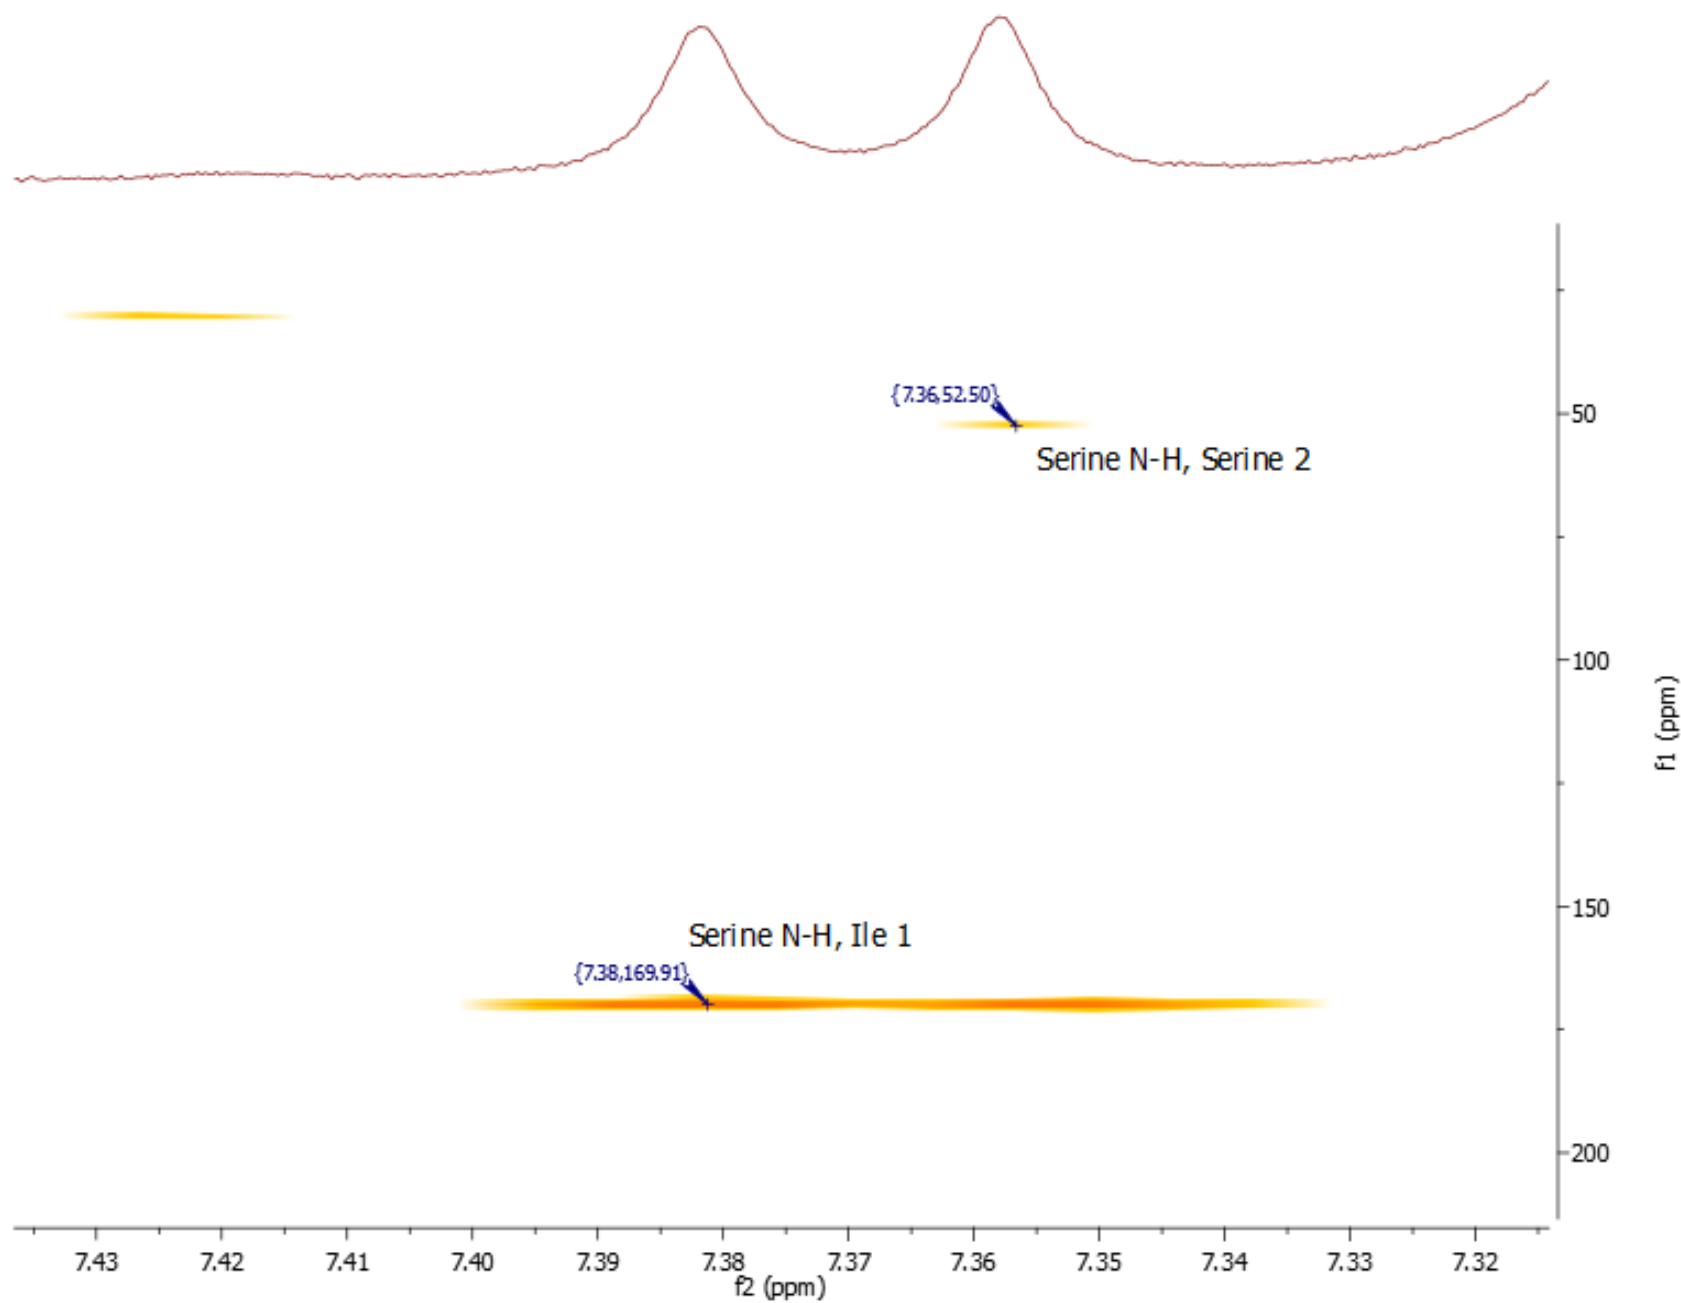

Figure S6. Ser<sub>5</sub> backbone  $-NH$  HMBC correlations for **12a**.

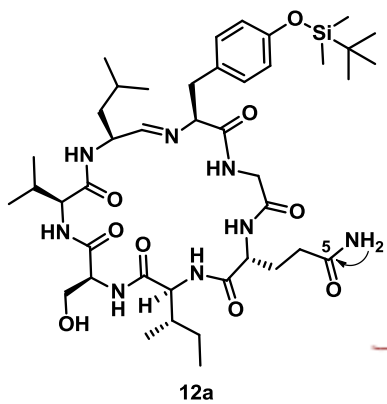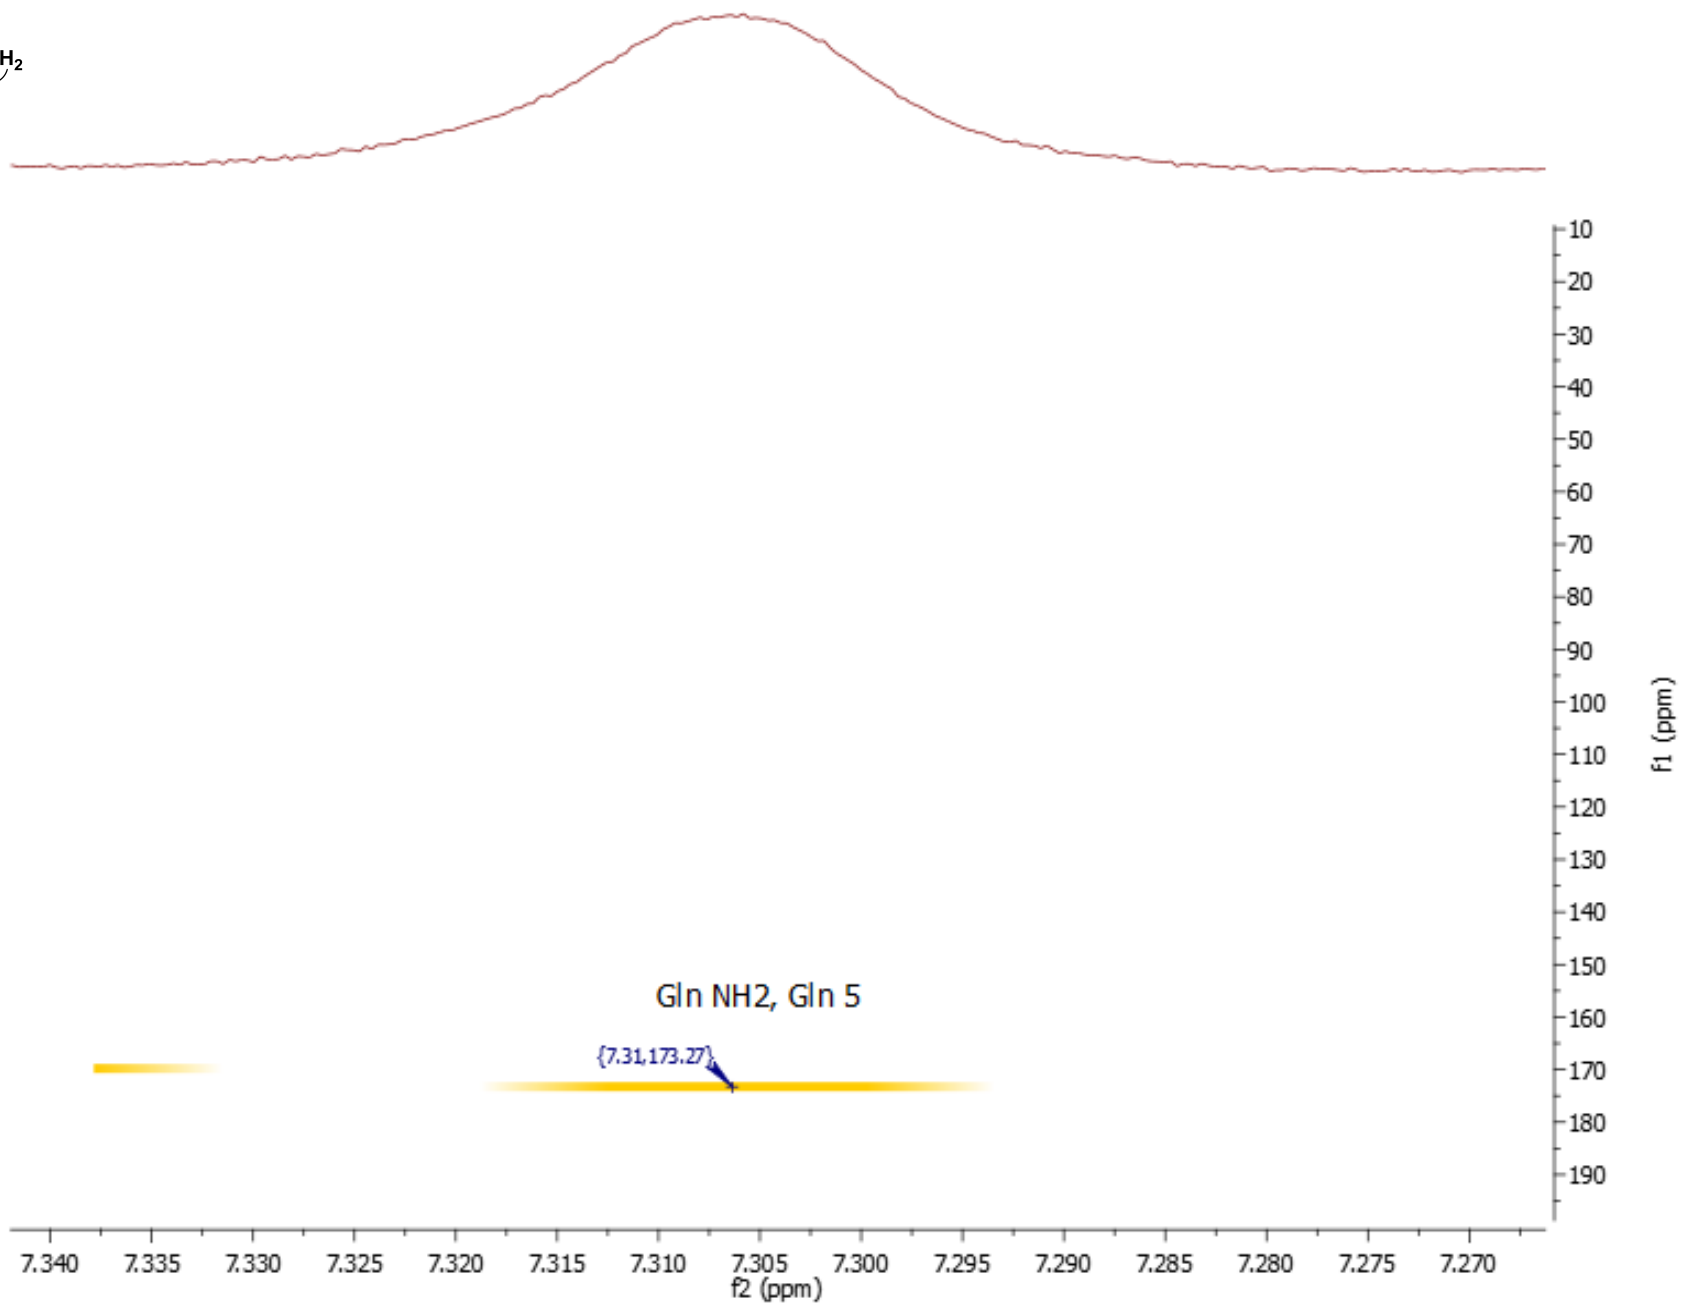

Figure S7A. D-Gln<sub>3</sub> side chain –NH HMBC correlations for **12a**.

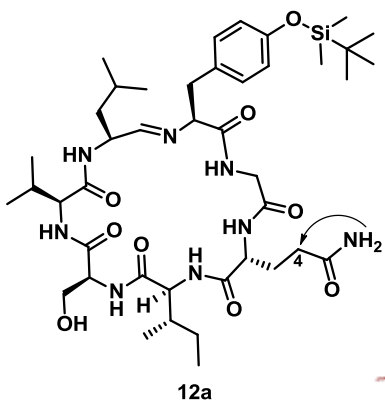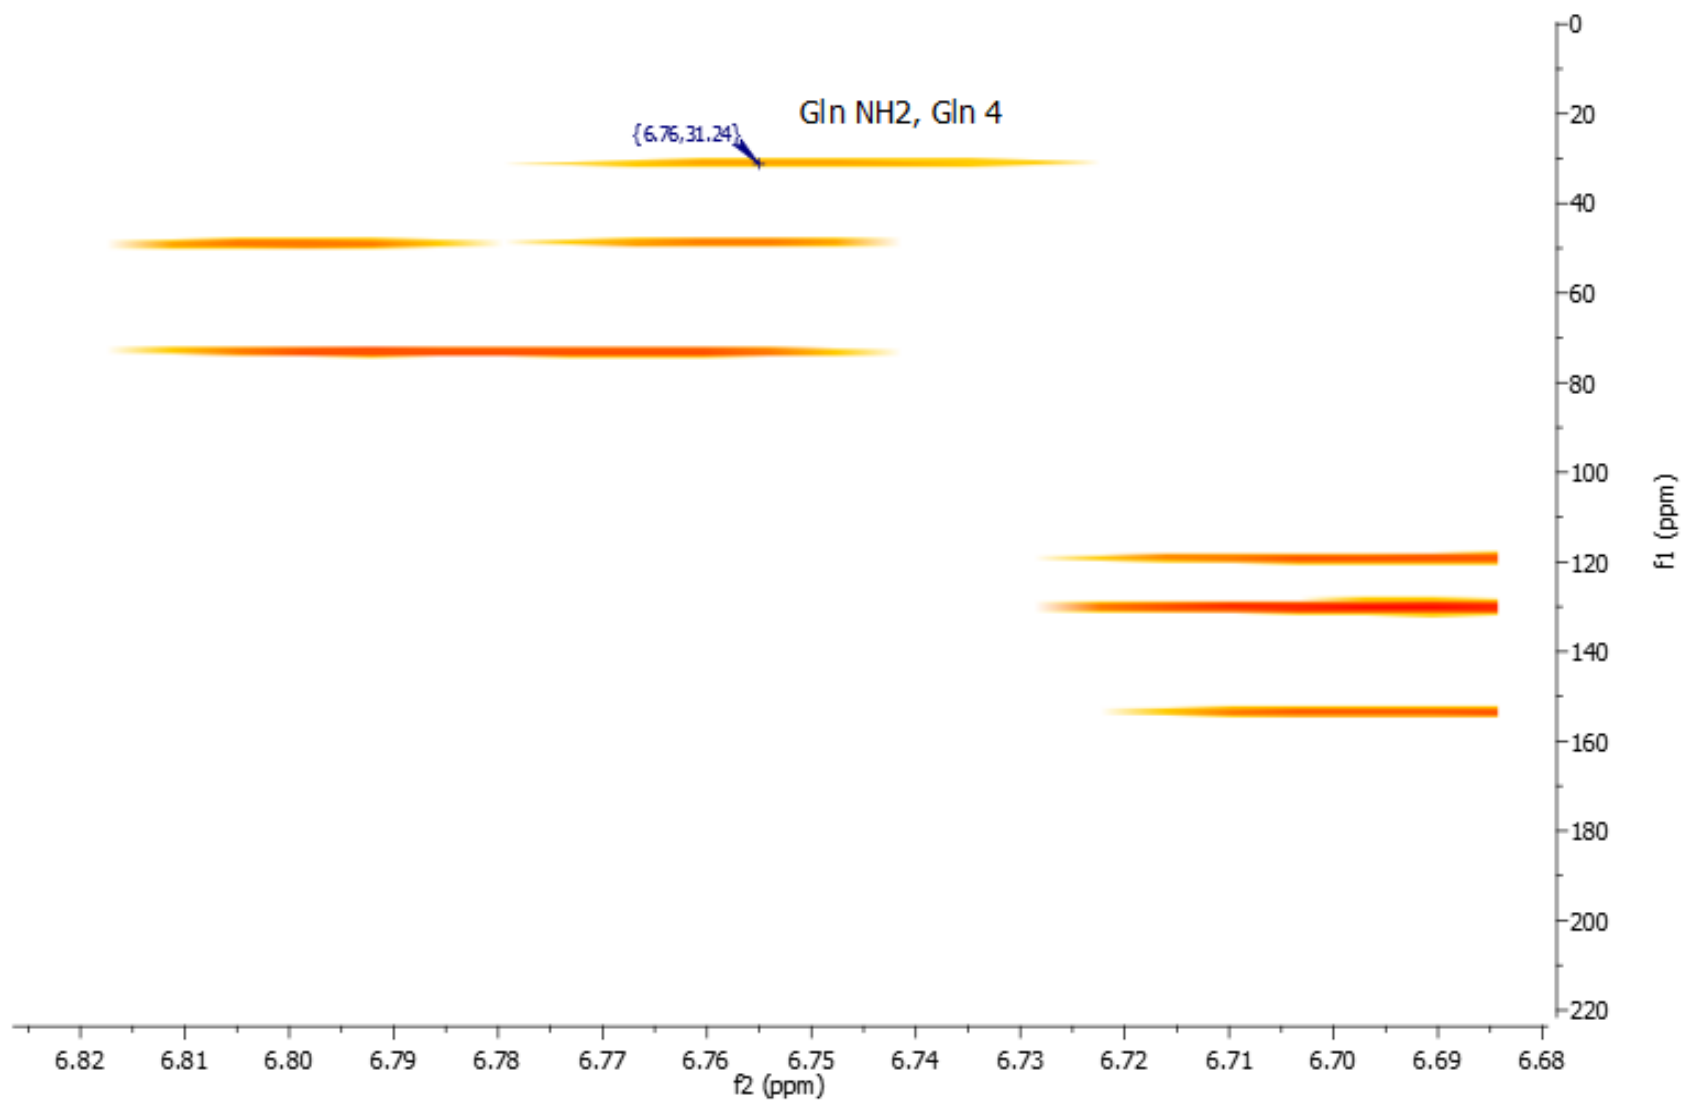

**Figure S7B.** D-Gln<sub>3</sub> side chain –NH HMBC correlations for **12a** (continued).

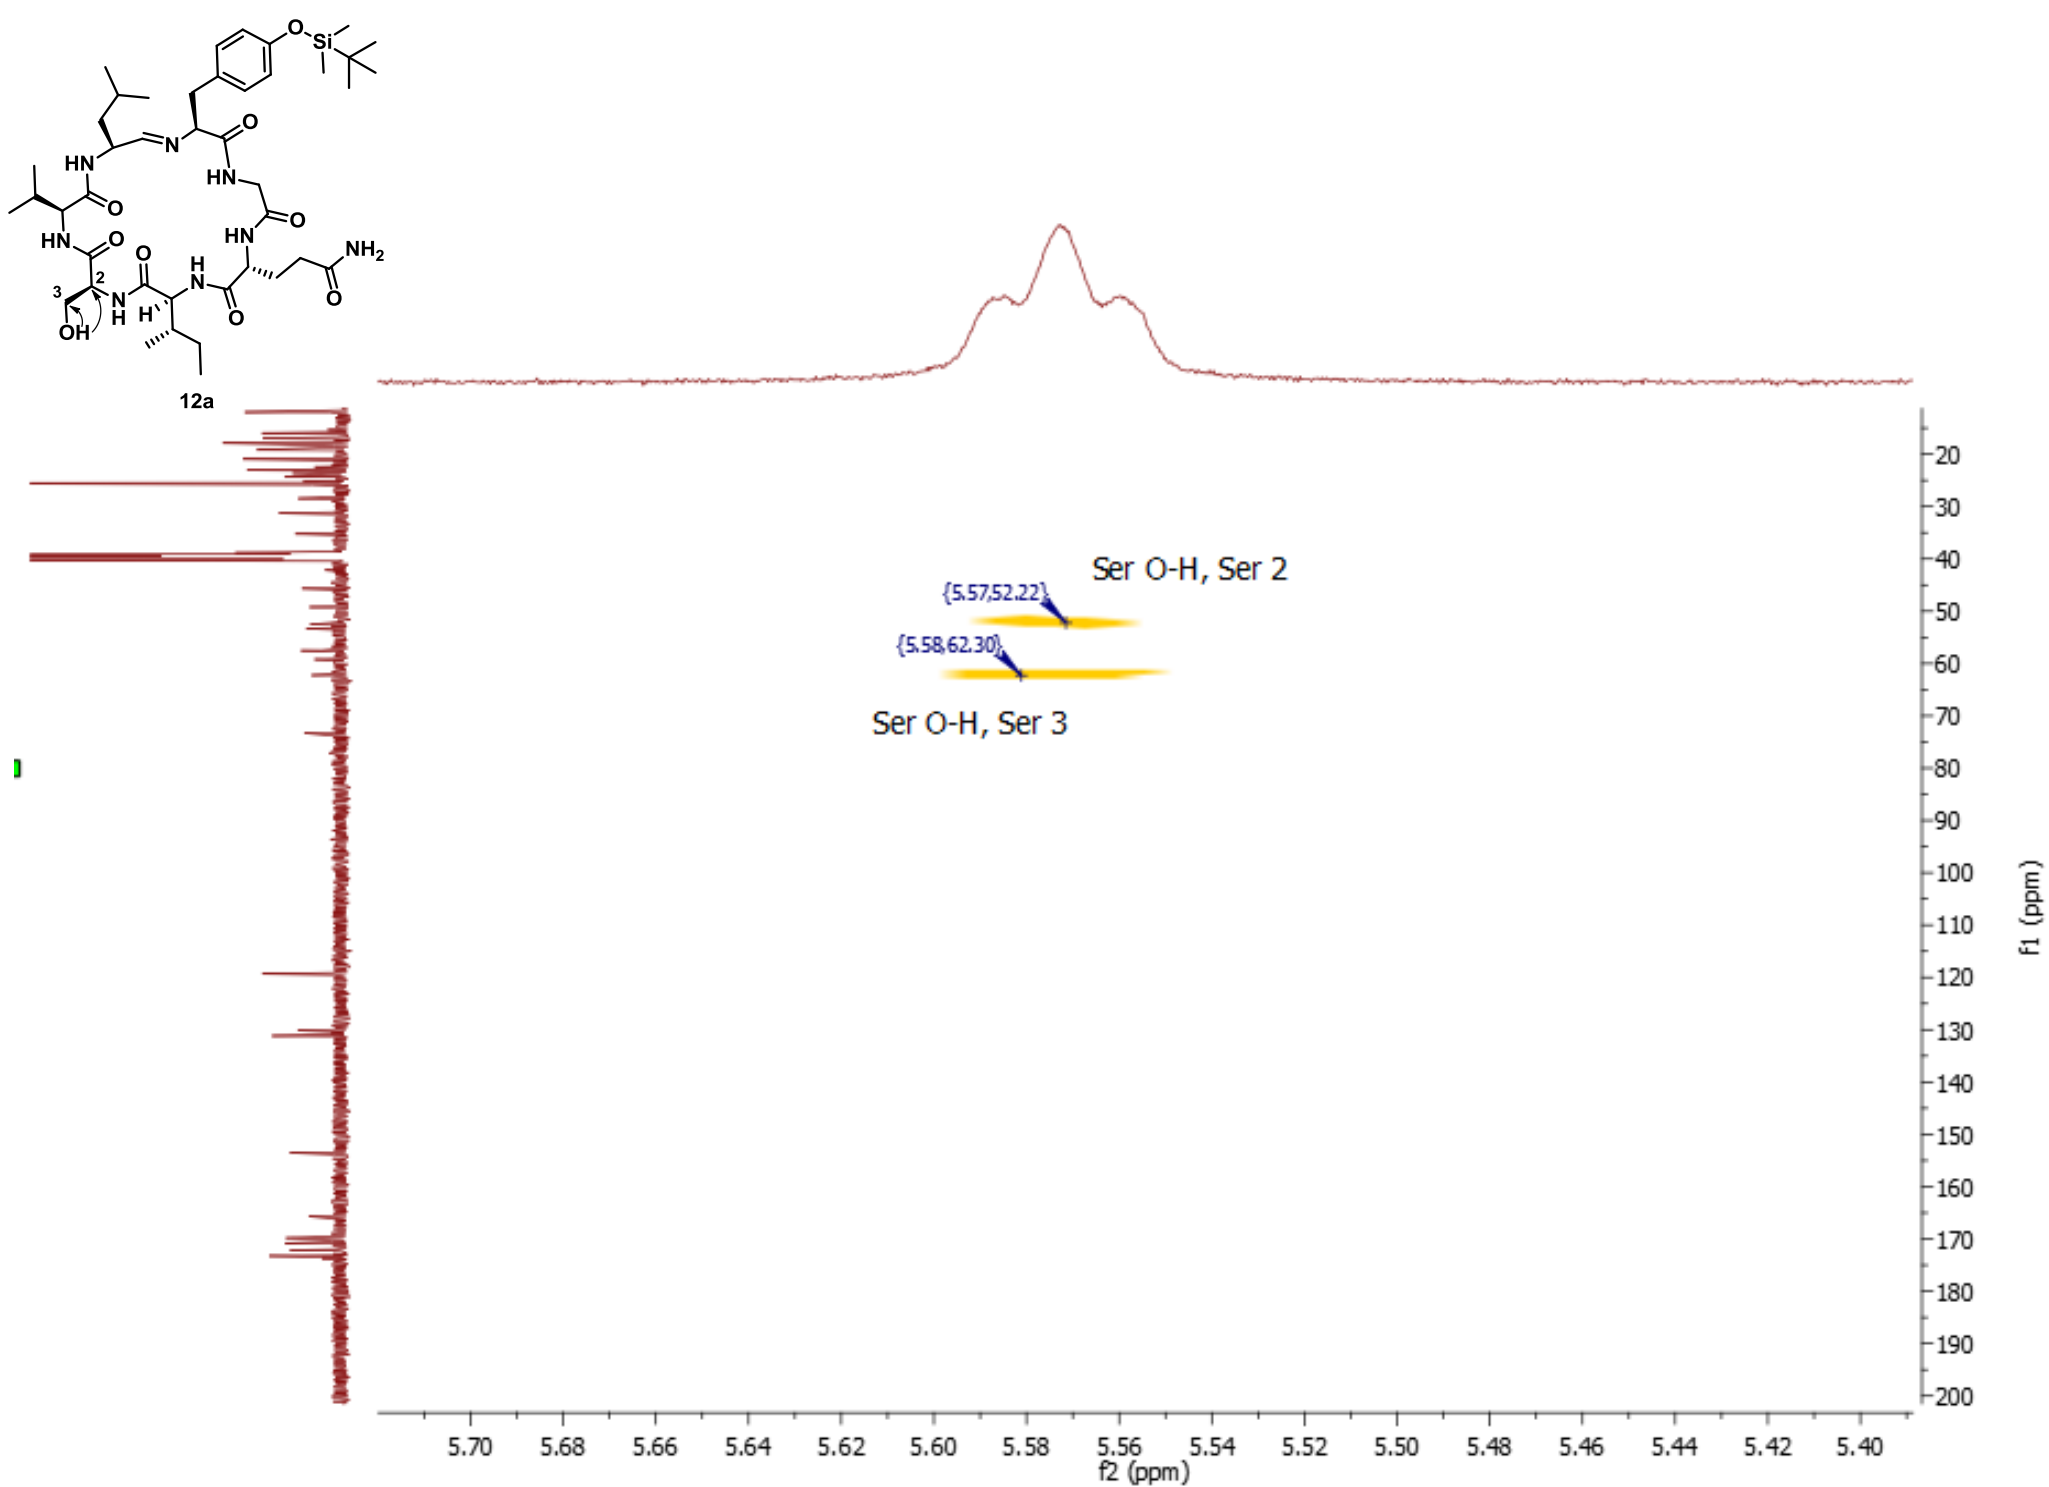

Figure S8. Ser<sub>5</sub> side chain -OH HMBC correlations for **12a**.



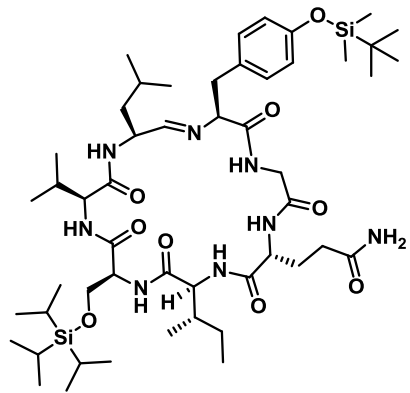

**12b**

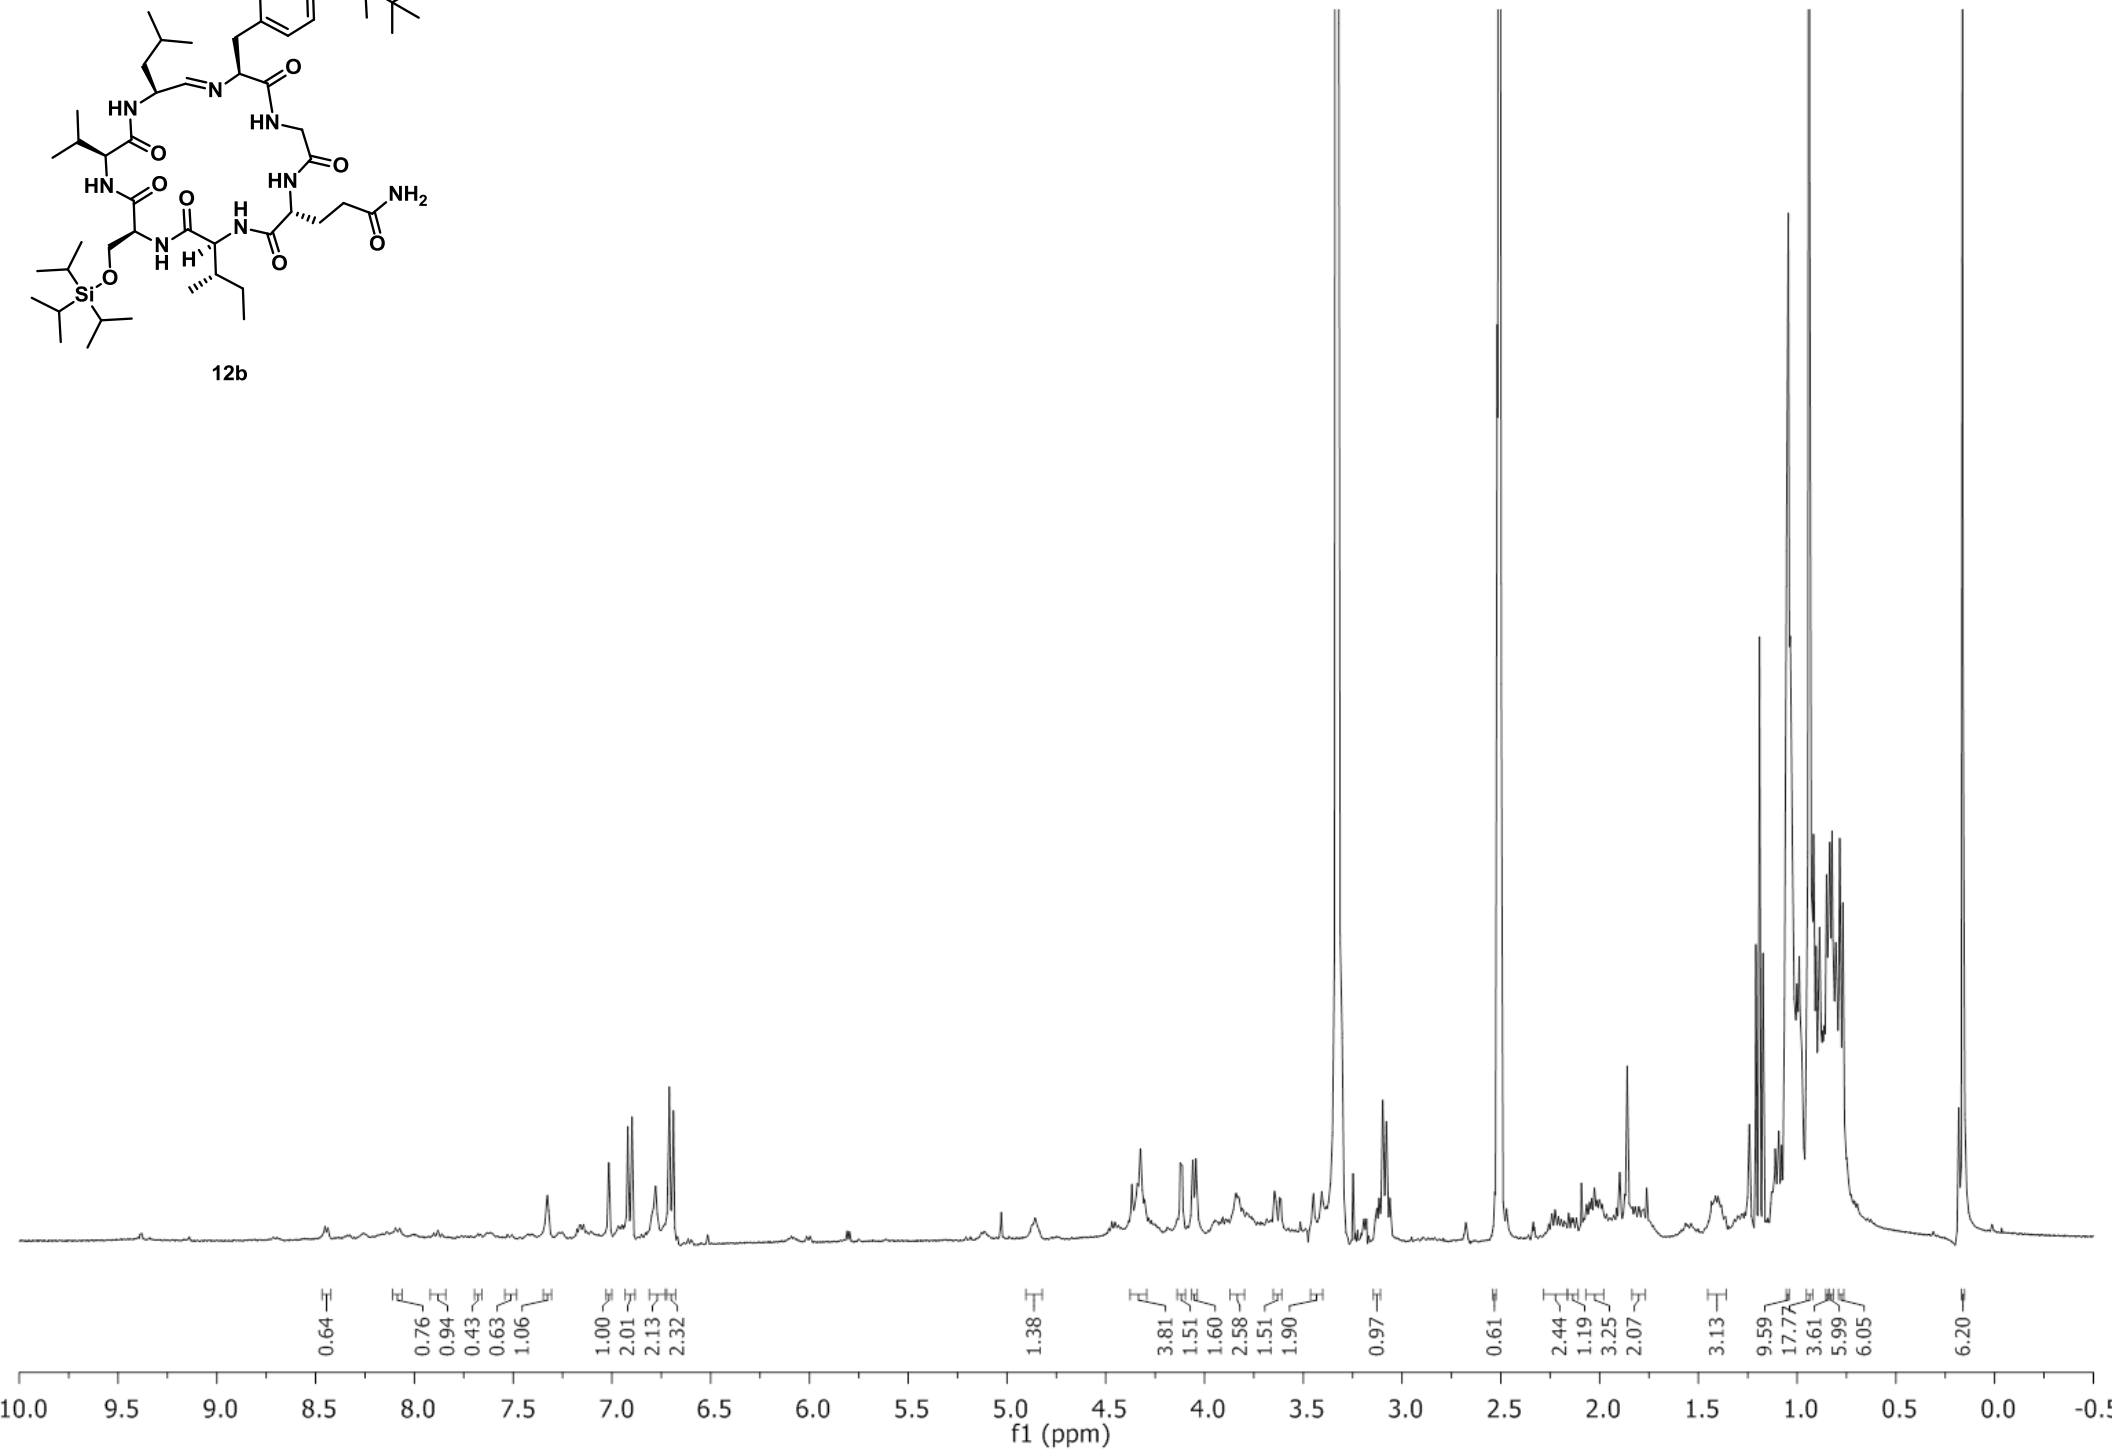

$^1\text{H}$  NMR ( $d_6$ -DMSO, 400 MHz) of compound **12b**.

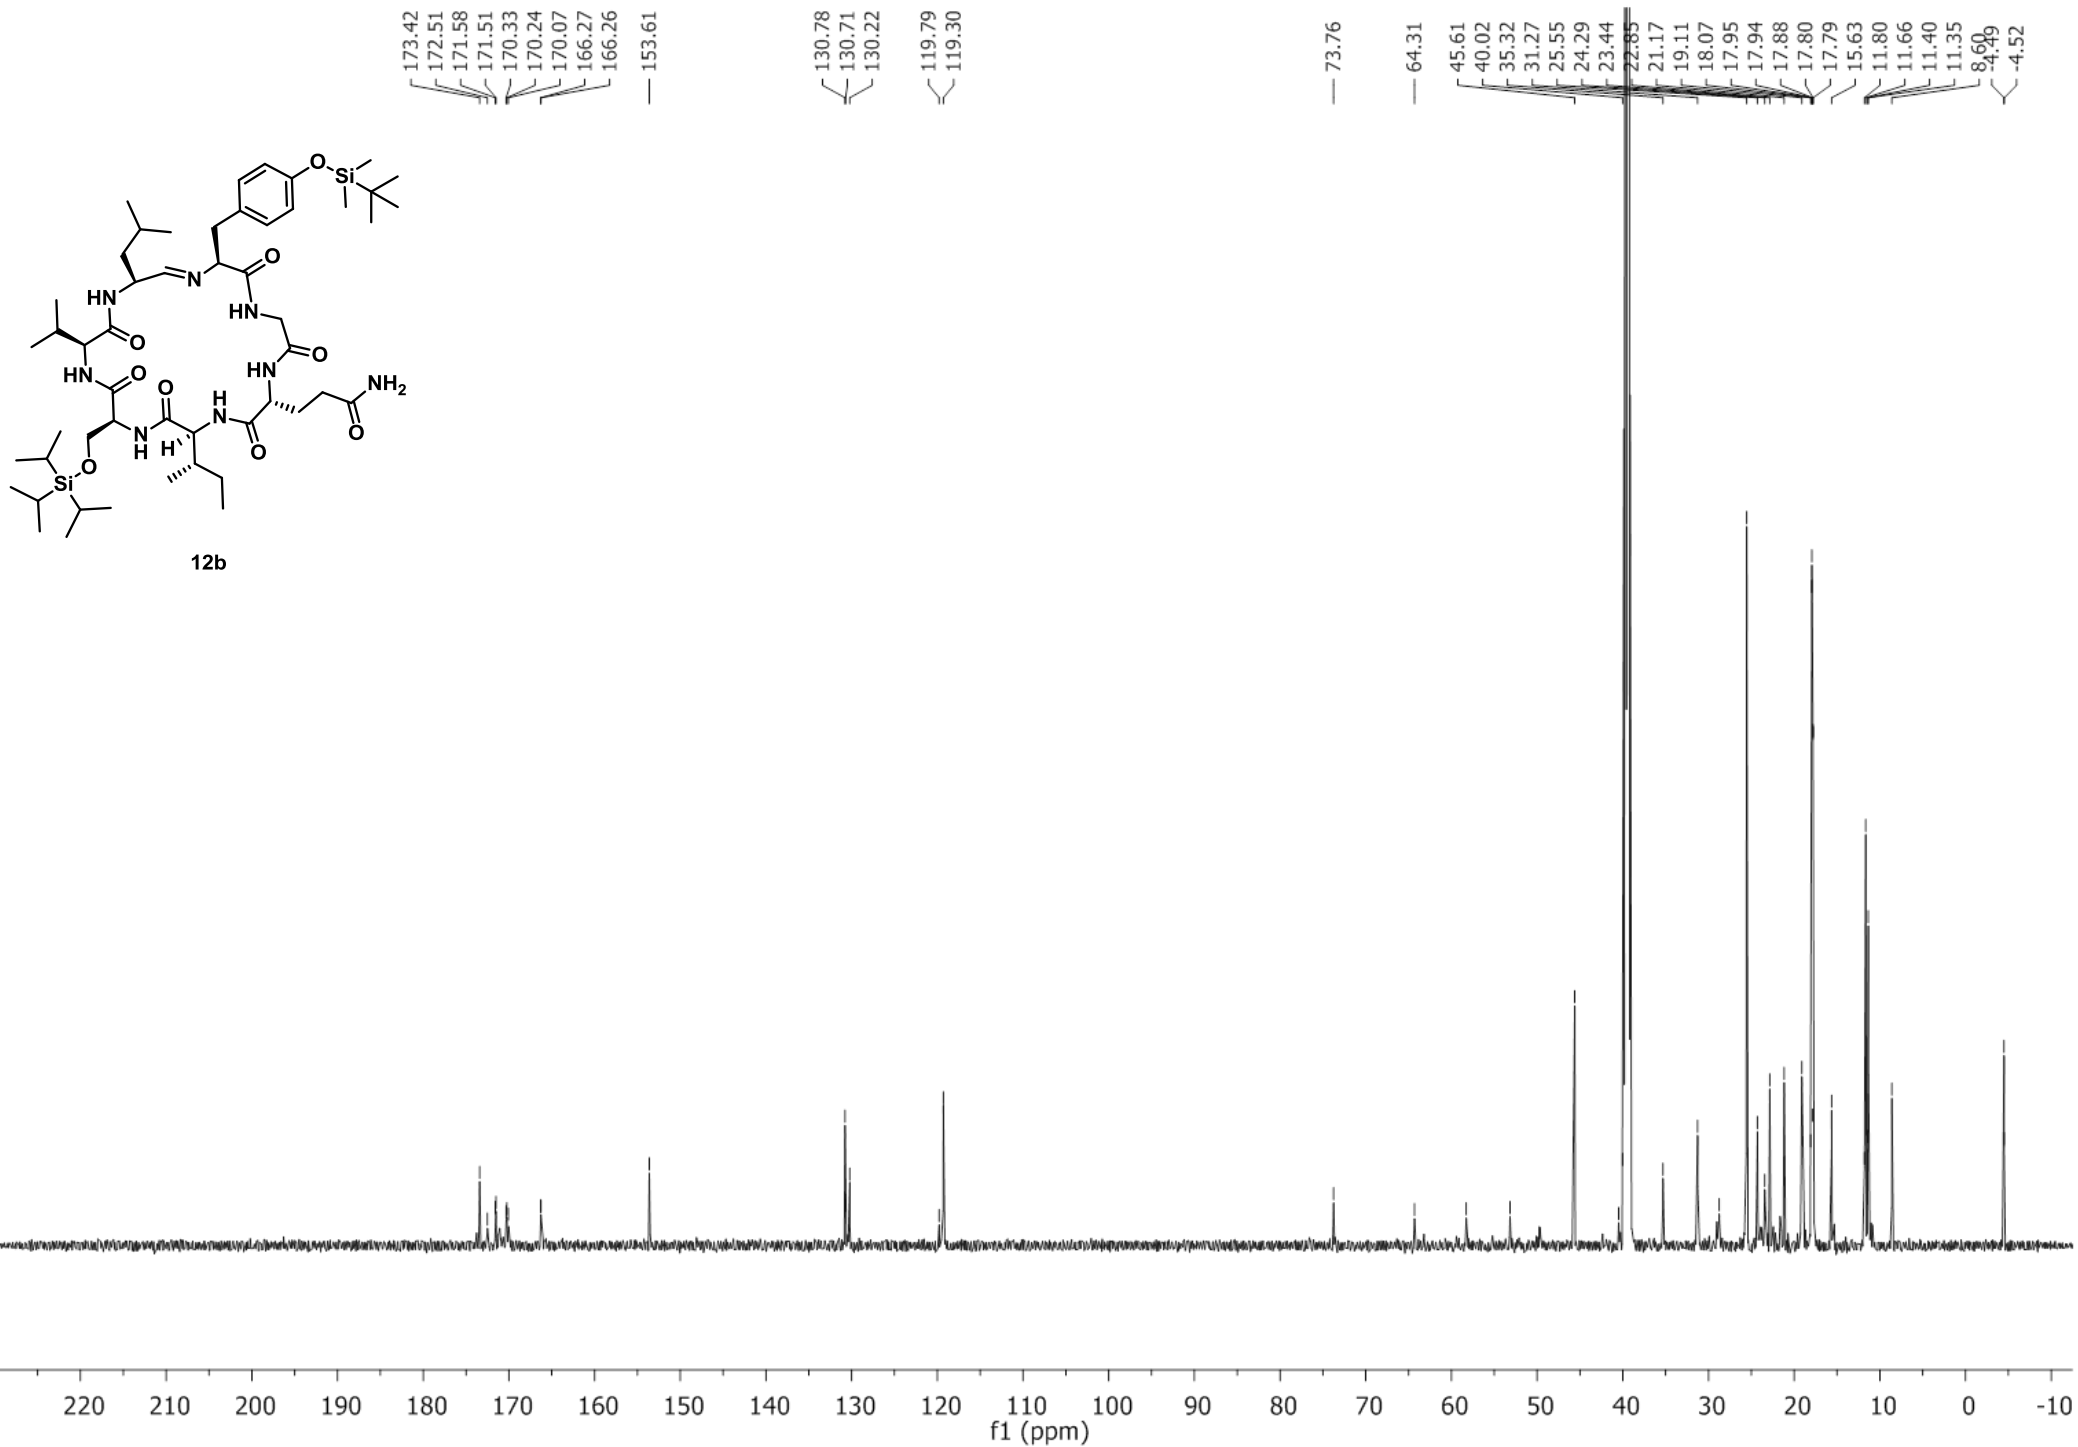

$^{13}\text{C}$  NMR ( $d_6$ -DMSO, 176 MHz) of compound **12b**.

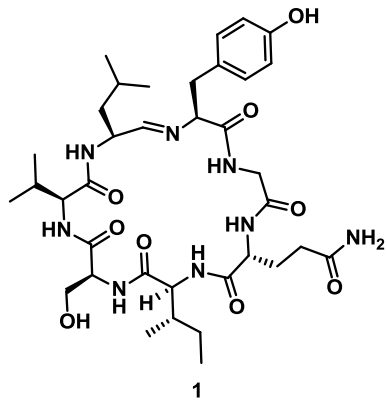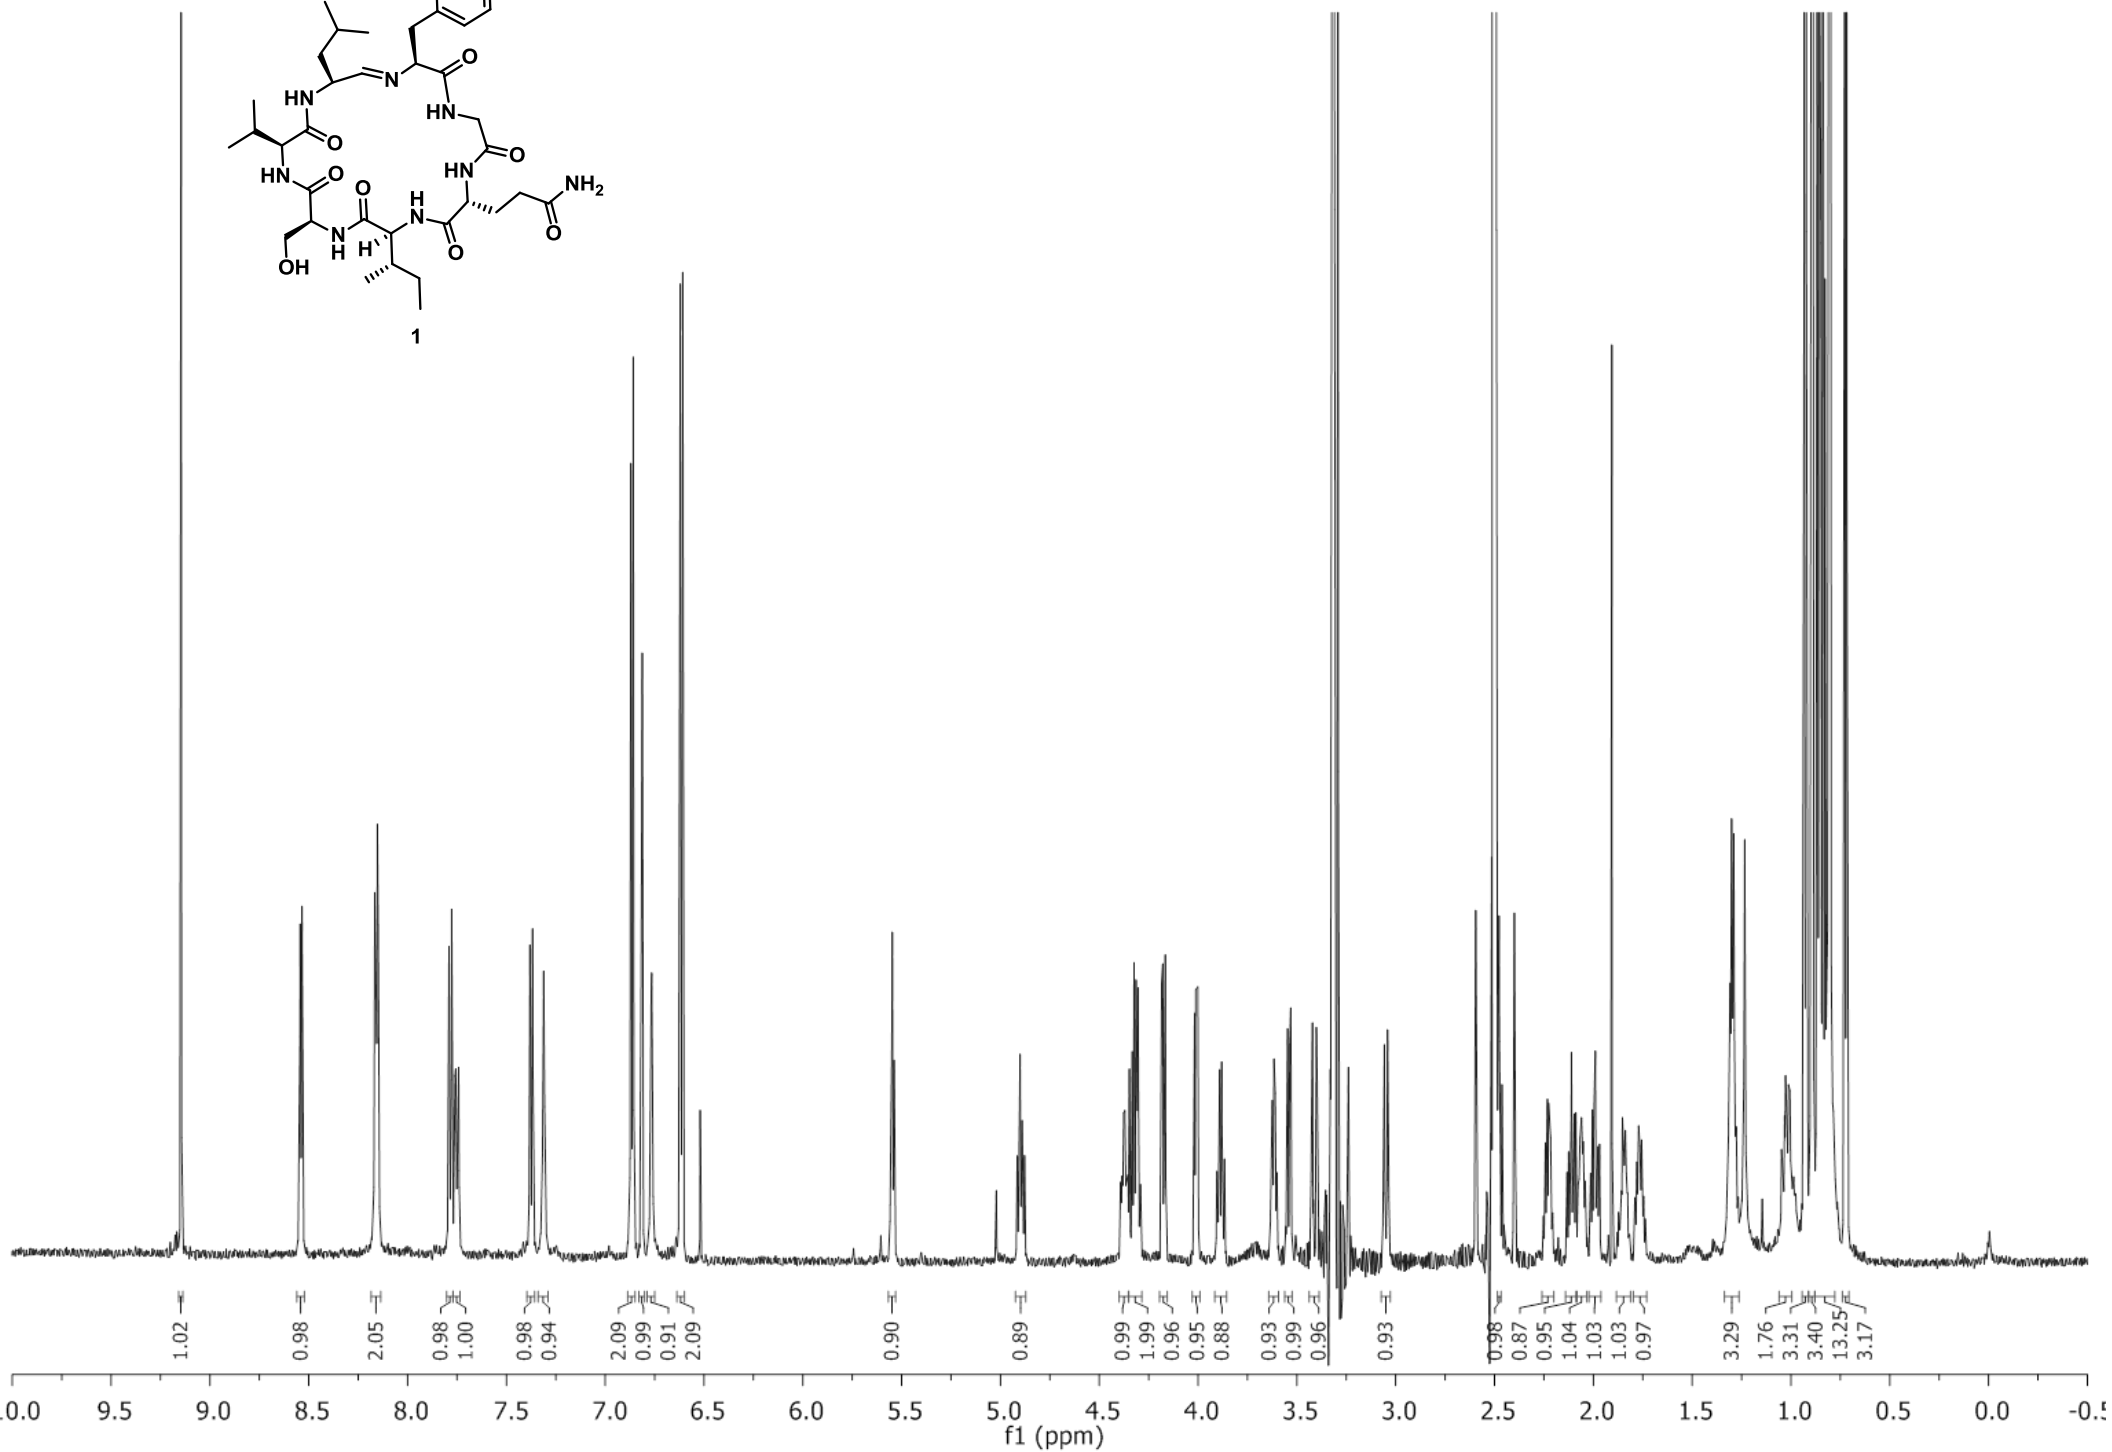

$^1\text{H}$  NMR ( $d_6$ -DMSO, 700 MHz) of scytonemide A (1).

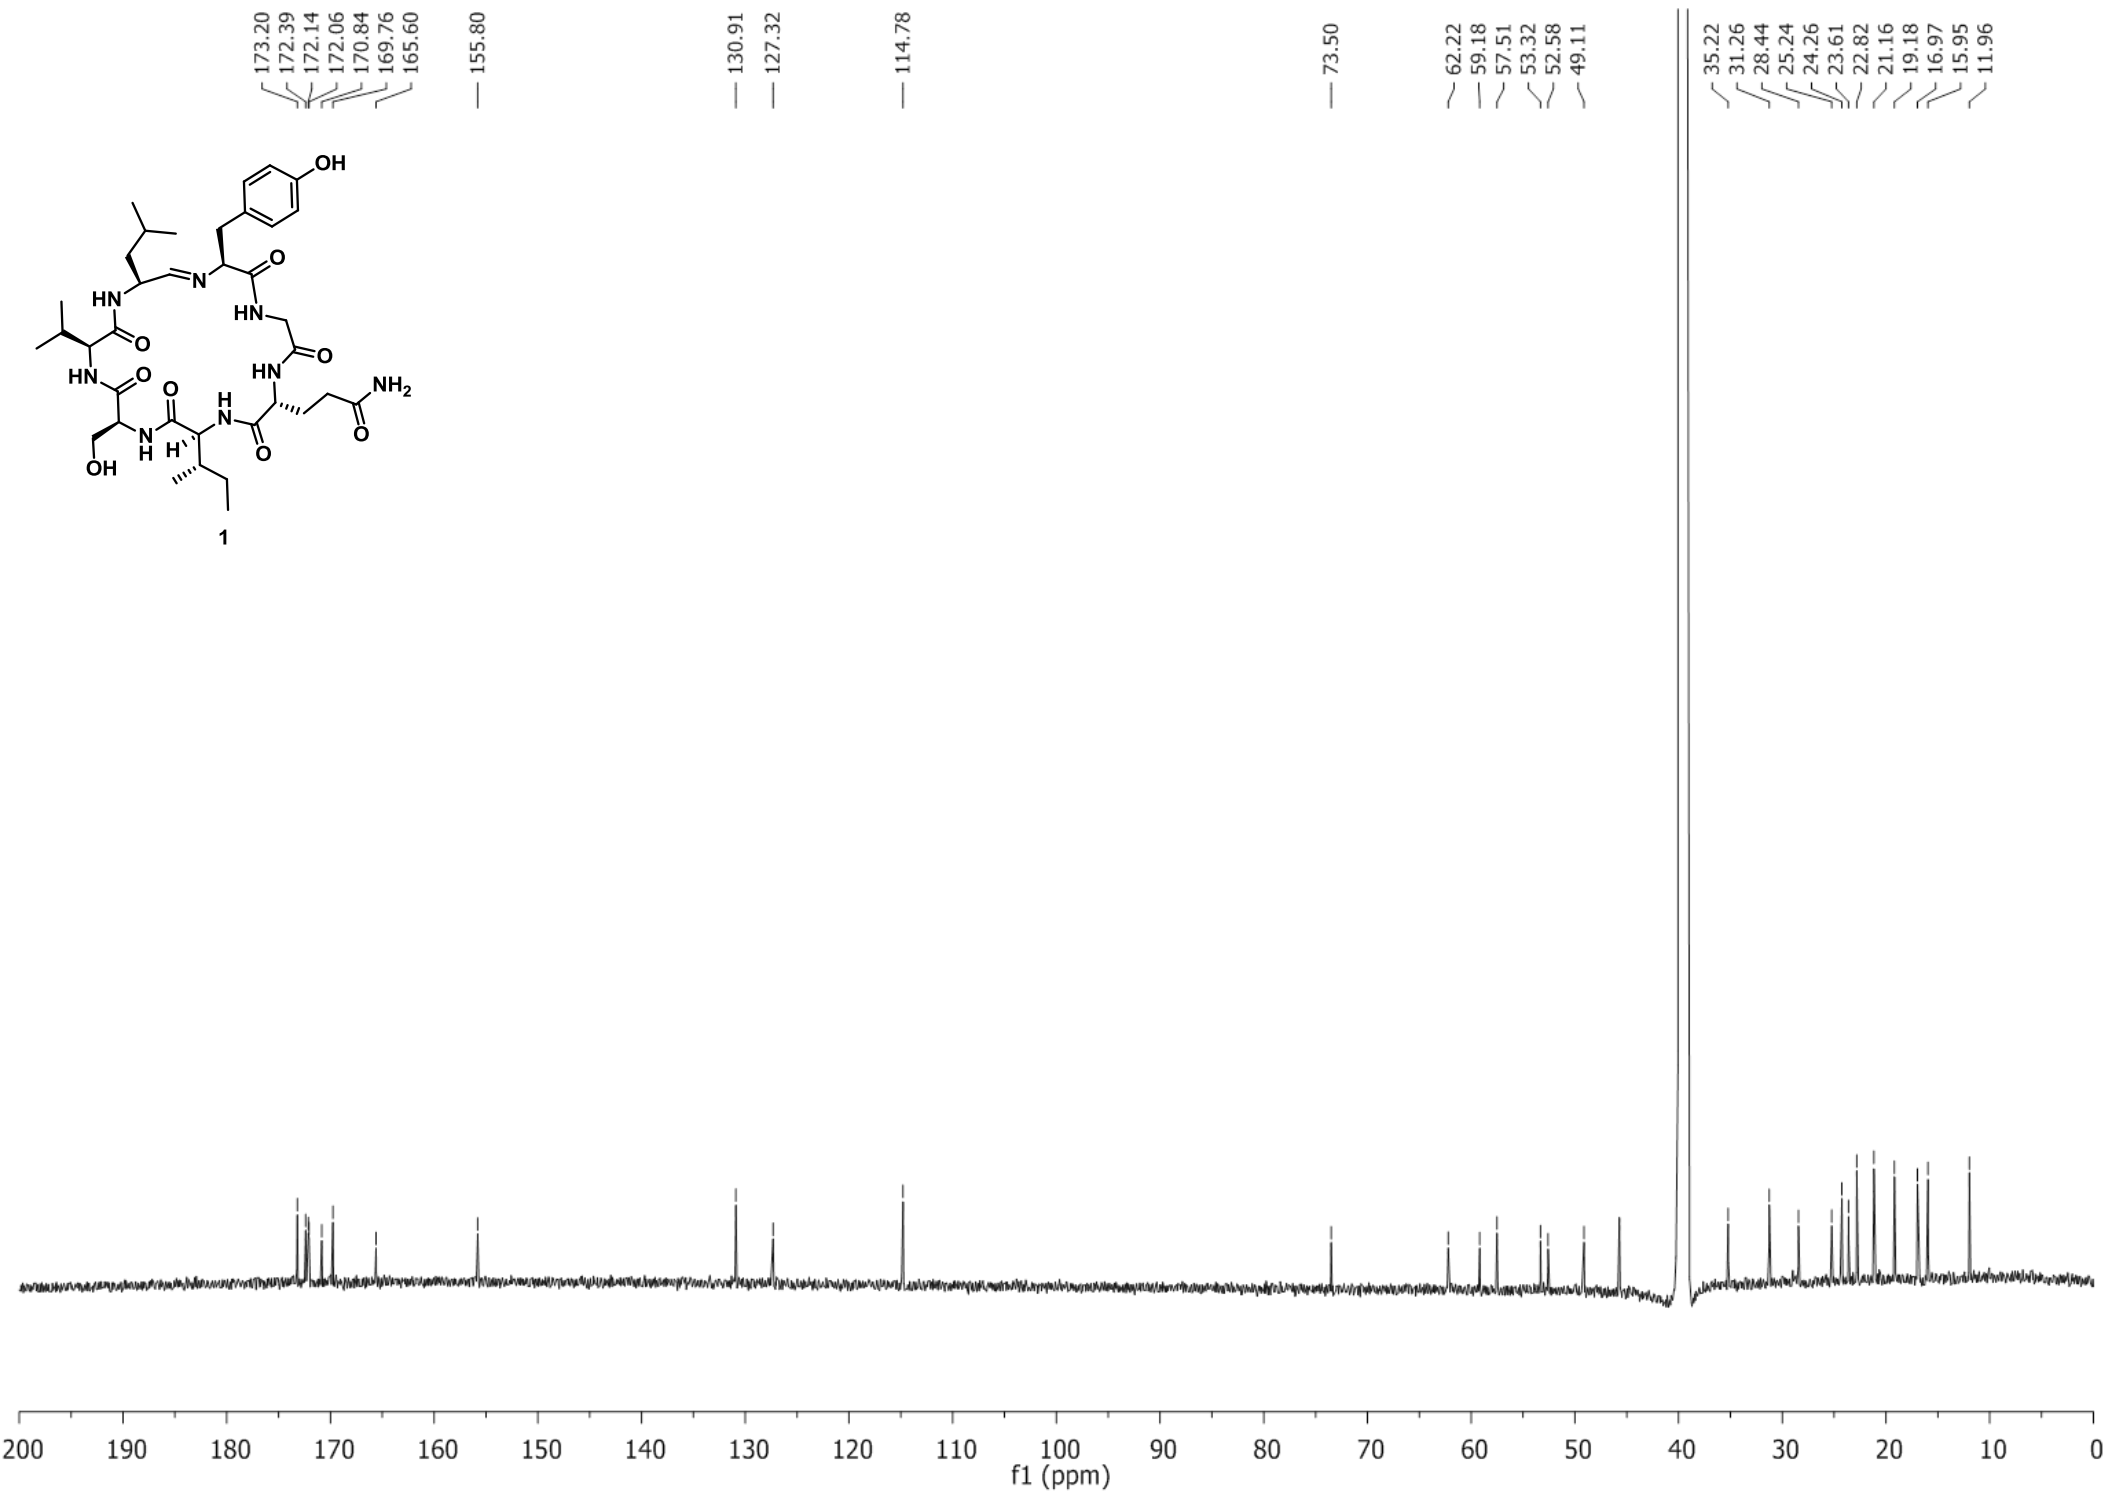

$^{13}\text{C}$  NMR ( $d_6$ -DMSO, 176 MHz) of scytonemide A (1).

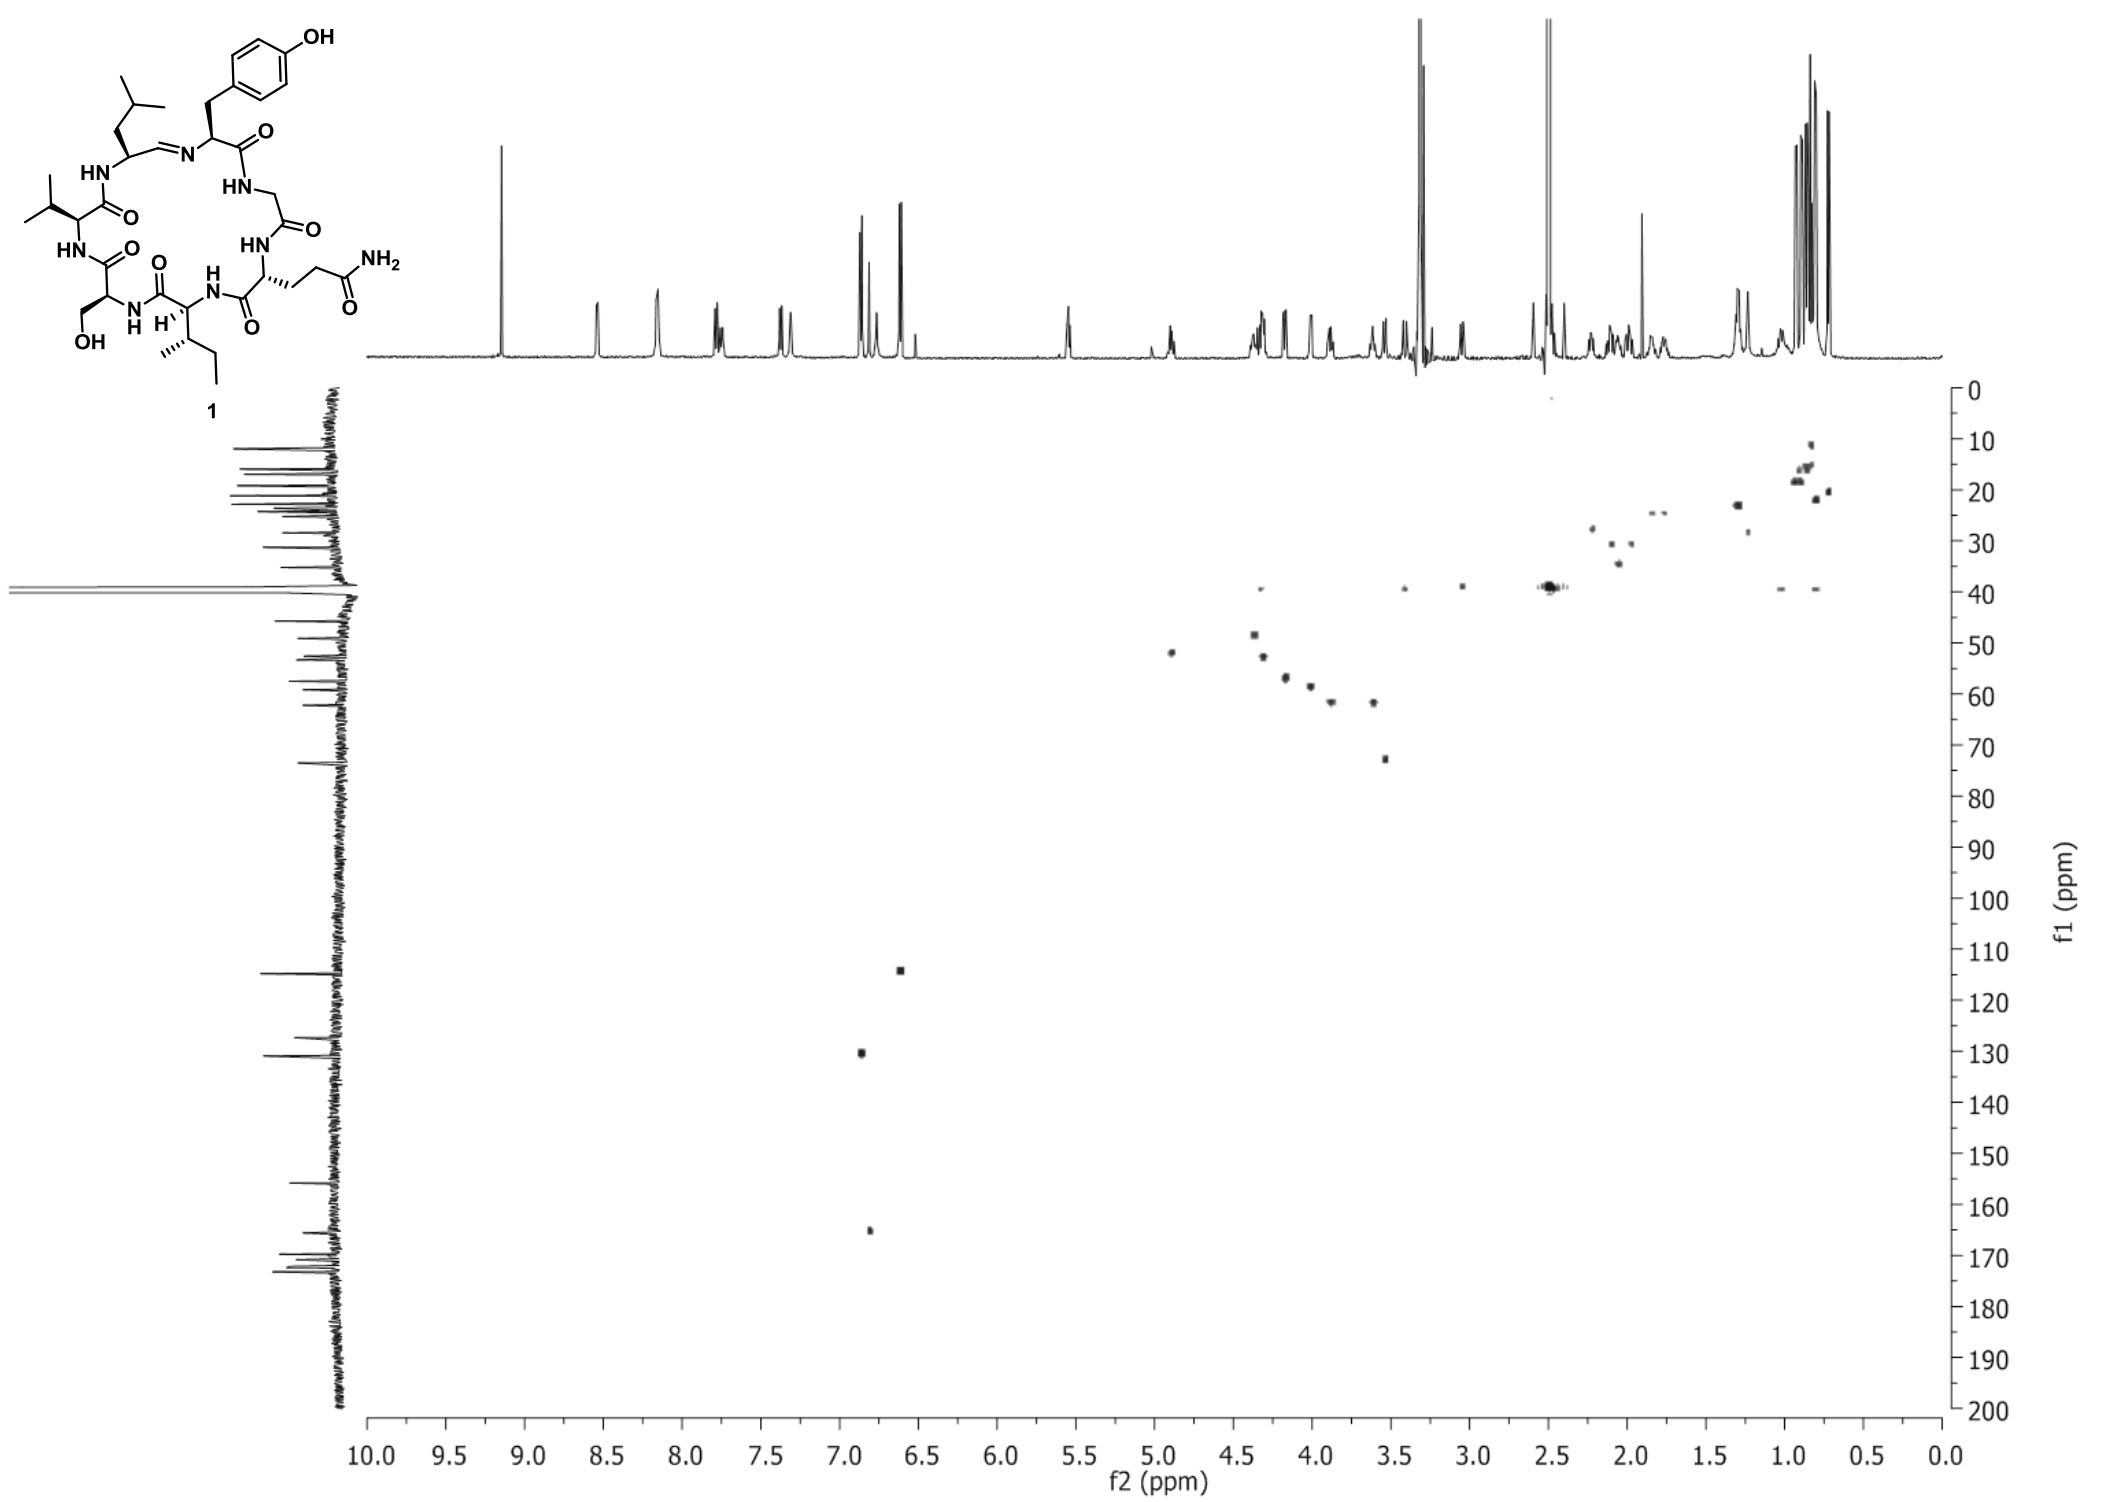

HSQC NMR ( $d_6$ -DMSO, 700 MHz) of scytonemide A (1).

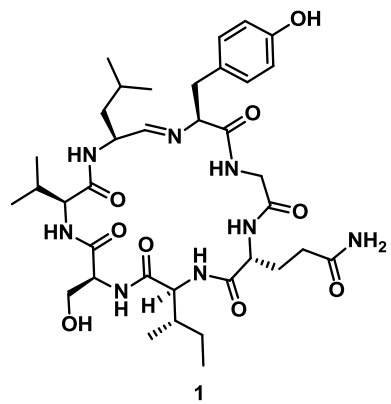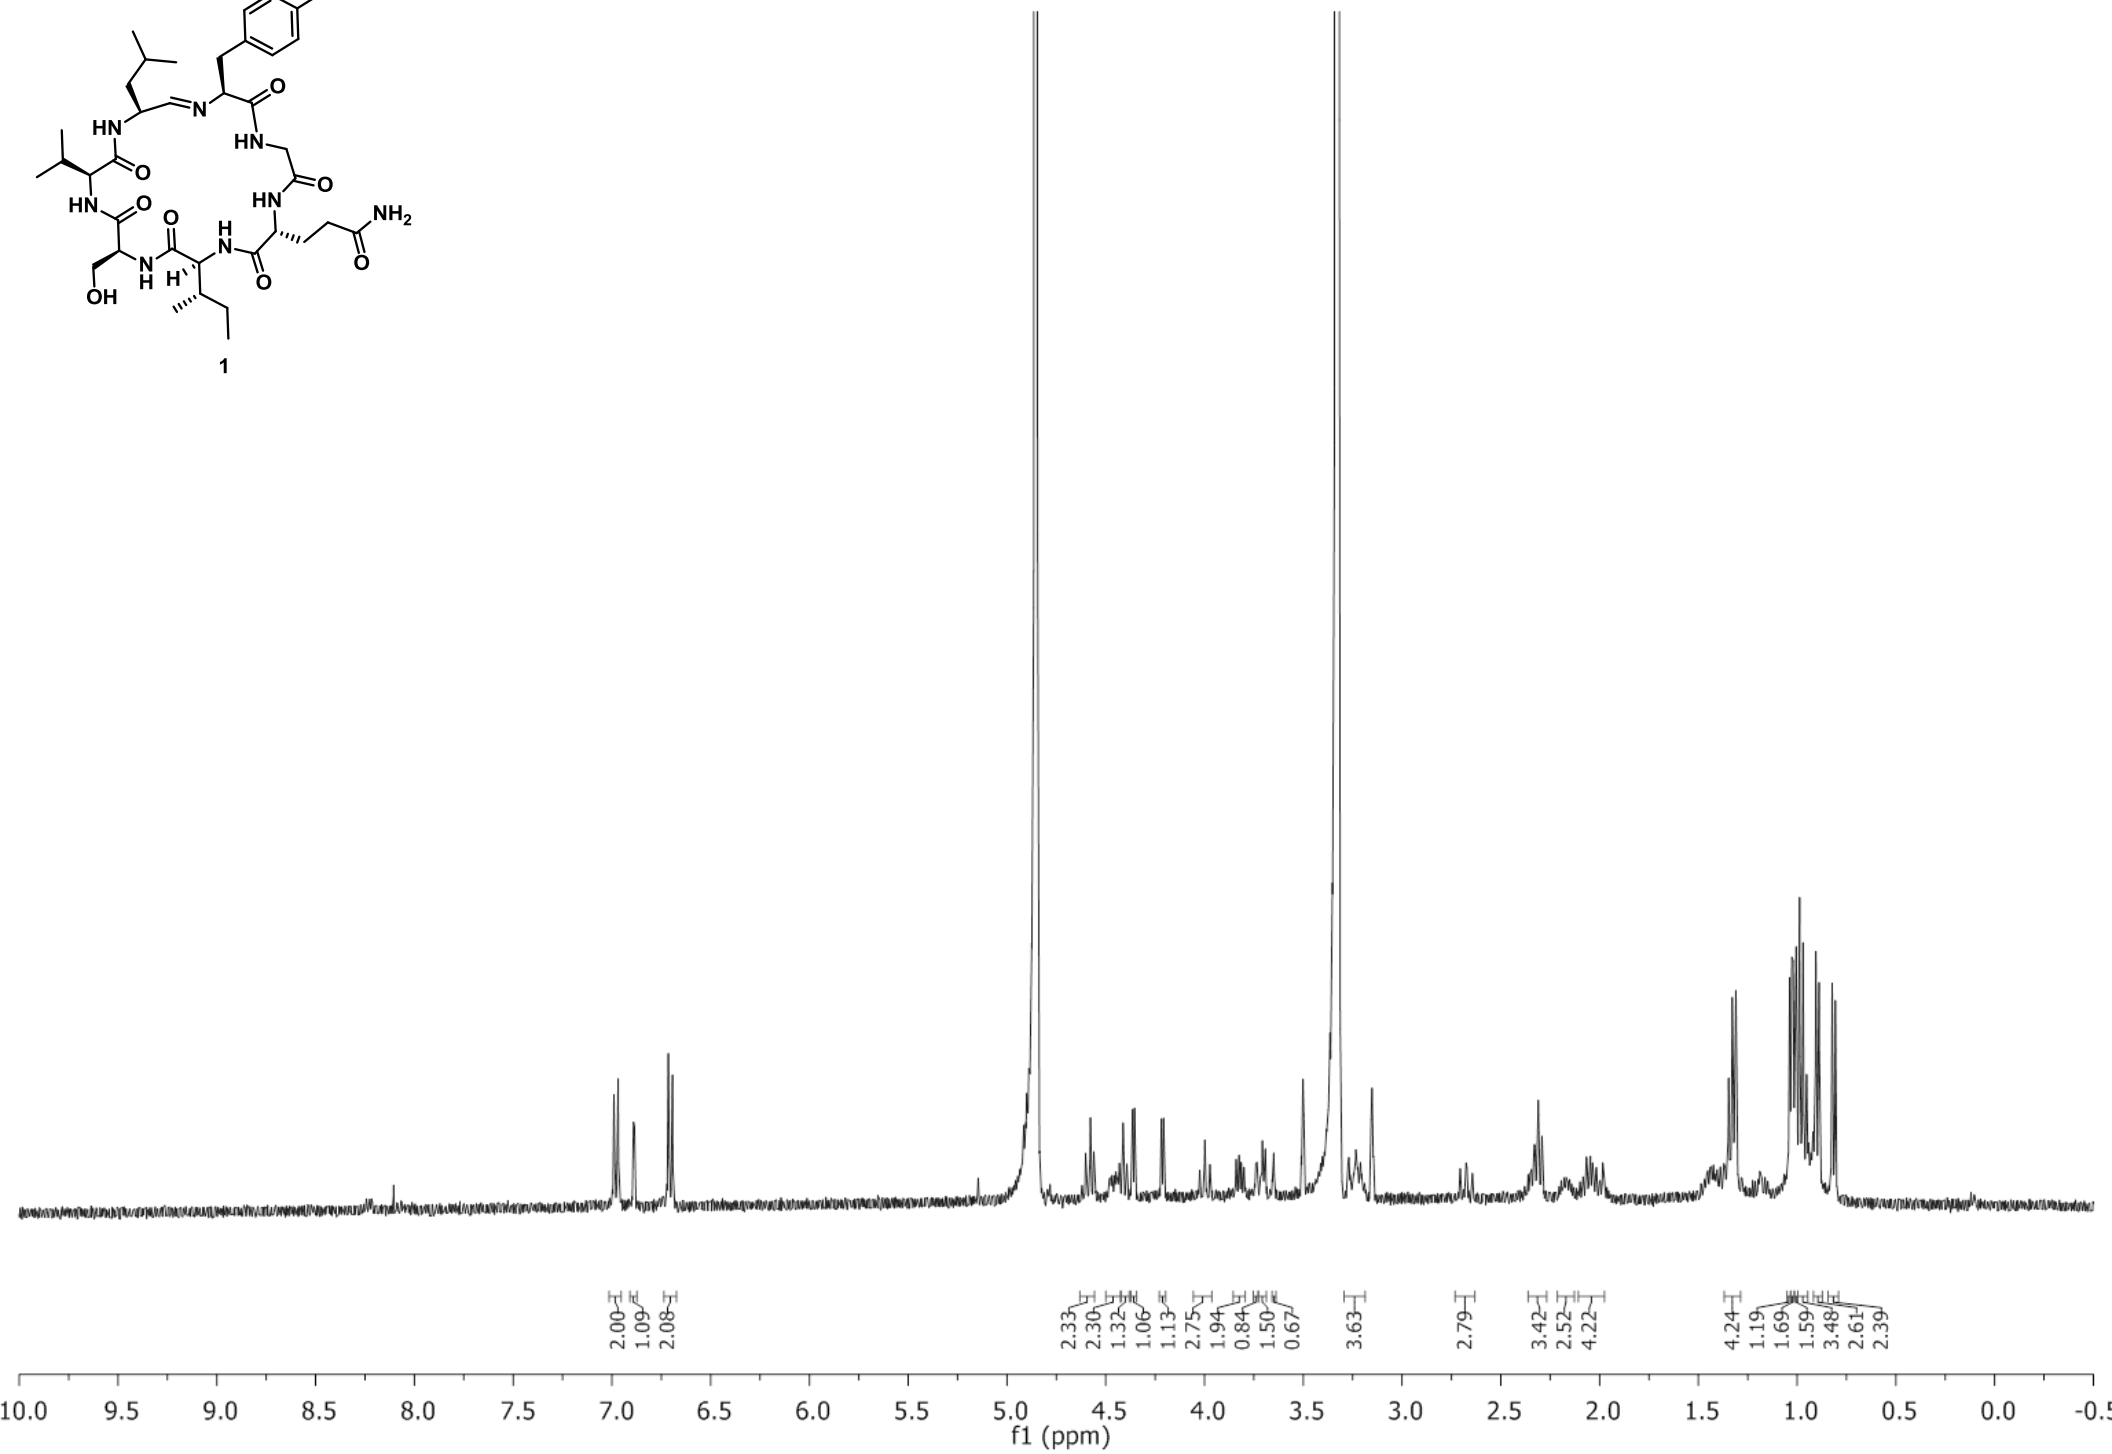

$^1\text{H}$  NMR (methanol- $d_4$ , 400 MHz) of scytonemide A (1).

**Figure S9.** Selective TOCSY experiments for amino acid residues of scytonemide A (**1**).

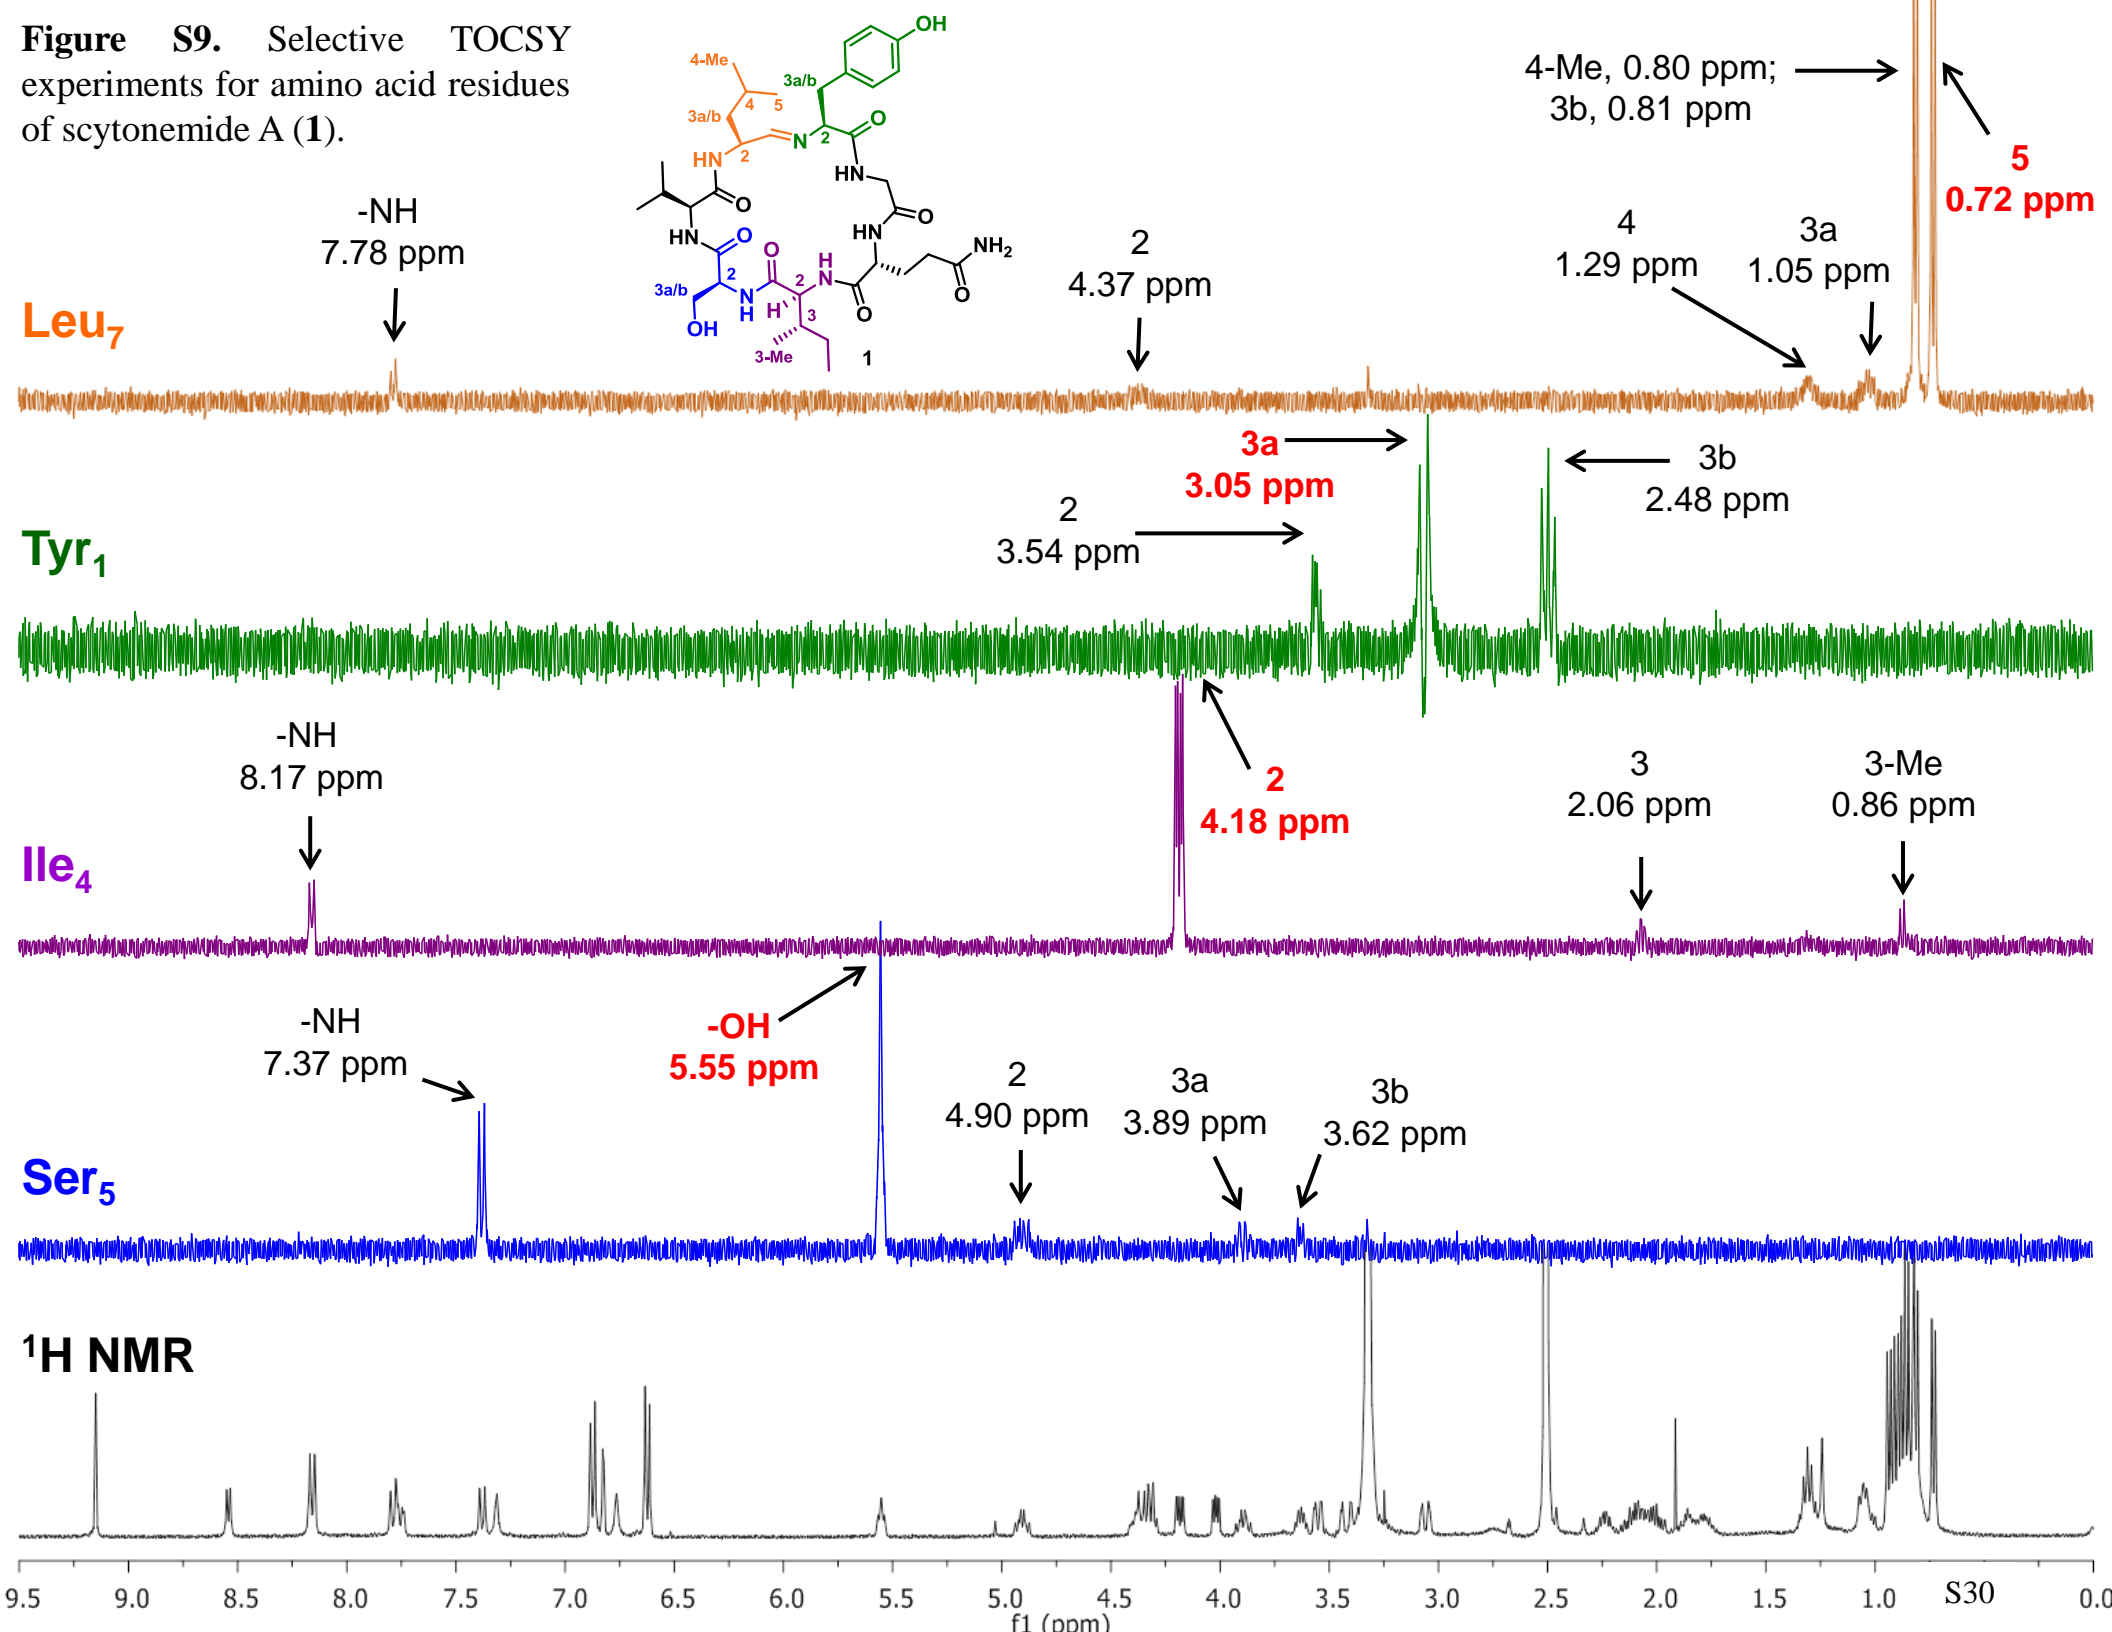

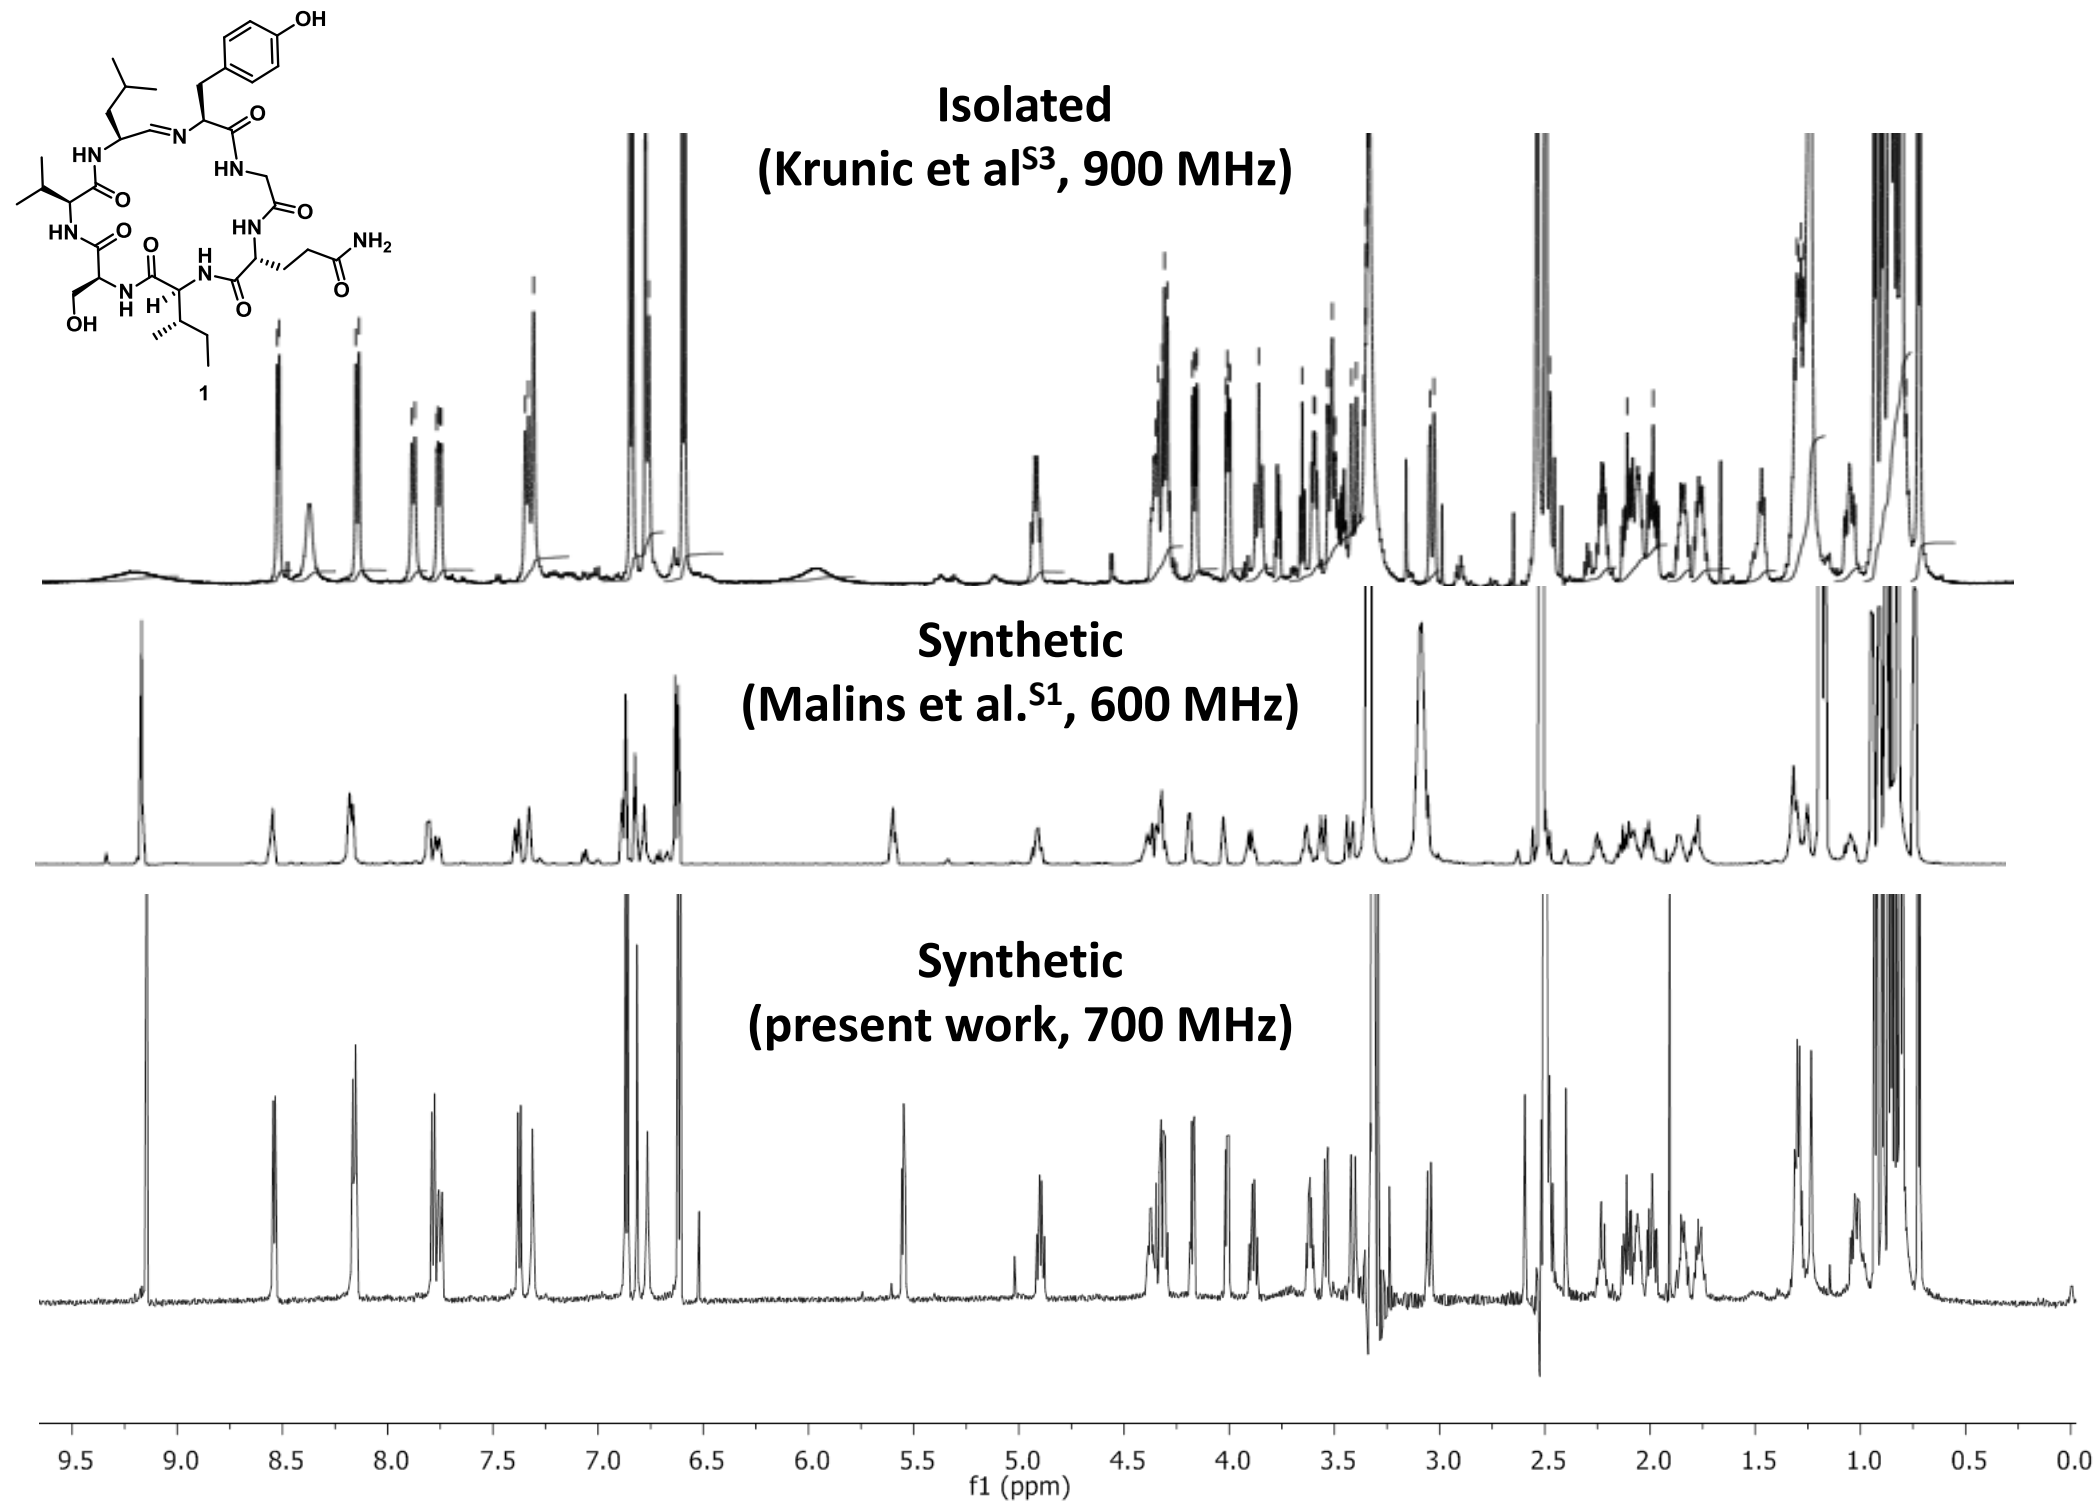

**Figure S10.** <sup>1</sup>H NMR spectra for isolated scytonemide A (**1**) (Kronic et al.<sup>S1</sup> top) and synthesized **1** (Malins et al.<sup>S2</sup> middle; present work, bottom).



## References

(S1) Malins, L. R.; deGruyter, J. N.; Robbins, K. J.; Scola, P. M.; Eastgate, M. D.; Ghadiri, M. R.; Baran, P. S. *J. Am. Chem. Soc.* **2017**, *139*, 5233-5241.

(S2) Eissler, S.; Kley, M.; Bächle, D.; Loidl, G.; Meier, T.; Samson, D. *J. Pept. Sci.* **2017**, *23*, 757–762.

(S3) Kronic, A.; Vallat, A.; Mo, S.; Lantvit, D. D.; Swanson, S. M.; Orjala, J. *J. Nat. Prod.* **2010**, *73*, 1927–1932.
